# Supplementary material for: On the Flood Peak Distributions over China
Source: Copernicus journal article supplement (doi:10.5194/hess-2019-322), 2019-07-12
Supplement: Supplementary file [file hess-2019-322-AC2-supplement.pdf]

## Responses to Reviewer 1

*(1) This paper presents an investigation of the characteristics of annual maximum streamflow using a comprehensive database of more than 1000 stream gauges across China. The authors also related flood occurrences and associated changes to catchment regulations and other climatic drivers with a focus on tropical storms. The authors' effort in collating and analyzing streamflow data from different sources is a significant contribution to large-scale hydrology. I'm particularly impressed by the database being used, and found the paper has the potential to make significant contribution to the field, at both regional and global scales. To make the contributions of this study really come through, the authors must address several major issues. Most of these issues belongs to the structure and content, but there are also some methodological issues. I outlined these major issues in "General Comments" section, followed by more specific comments to further clarify my concerns. I'm recommending a major revision to provide the authors sufficient time to thoroughly revise the manuscript.*

**Response:** We really appreciate the reviewer's efforts and time on our manuscript. We revise the manuscript substantially based on all the comments, and make a point-by-point response below. The reviewer's comments are enumerated. Our replies to each comment start with "**Response**". Thanks!

*(2) Perhaps this is an editorial decision but I found the bottom-left panel of Figure 1 (the marine region southern of China) irrelevant to the scientific content of this paper, as there was no gauge located in that area. Please also note that there is political tension around this region due to ongoing territorial disputes involved several countries (see [https://en.wikipedia.org/wiki/Territorial\\_disputes\\_in\\_the\\_South\\_China\\_Sea](https://en.wikipedia.org/wiki/Territorial_disputes_in_the_South_China_Sea)). As political science is not the focus of this study, I strongly recommend omitting this feature from the map to avoid unnecessary debates.*

**Response:** We prefer to keep the bottom-left panel as where it is. As the reviewer also note that it is an editorial decision, we will follow the editor's advice on this particular point. Thanks!

*(3) The nature of an analogous study: this paper shares a significant similarity to that of Villarini and Smith (2010) in terms of manuscript structure, narrative, methodology and content. As indicated at the beginning of my review, the findings are still significant contributions to the literature as this study used an unprecedented database for China and have improved the state-of-understanding of flood hazard at the regional and global scale. Nevertheless, I strongly recommend the authors to revise the manuscript substantially (i.e. making the manuscript more independent to its counterpart for the eastern of US) as the presented study has more potential than a simple incremental research.*

**Response:** We thank the reviewer for this comment. We indeed adopt similar methods as used in Villarini and Smith (2010), but target at different questions. As we have emphasized in the revised manuscript that the ultimate goal of the present study is to provide better characterization of flood hazard over China from both statistical and physical perspective. We appreciate that the reviewer realizes this point as well. The goal leads to a different structure of the paper. For instance, a major part of the present study is to understand the impacts of landfalling tropical cyclones on the upper-tail properties of flood peaks across China and the key

features of tropical cyclones that lead to most extreme floods. These contents together with the research goal is not what Villarini and Smith pursued in their paper. We reconstruct the Abstract and Introduction in the revised manuscript to make this clear. Thanks!

*(4) I would also consider it appropriate to highlight the link between this analysis to similar works across the globe to place this contribution in a broader context of current assessments and datasets being used worldwide to assess flood peak characteristics. There are some studies for other regions mentioned in the introduction, but they have not been discussed systematically to highlight the significance of a China-wide investigation. Considering the quality/magnitude of the database and analyses presented, I consider the study's most significant contribution (which unfortunately was not adequately highlighted in the current manuscript) is to complement the limited understanding of flood characteristics at the global scale (e.g. changes in flood magnitude and timing). Specifically, recent observation-based findings on flood hazard magnitude and timing (Do et al., 2019; Do et al., 2017; Hodgkins et al., 2017; Burn and Whitfield, 2018; Mangini et al., 2018; Hall and Blöschl, 2018; Slater and Villarini, 2016) have not provided much information for Asia (note that China contributes a significant share to Asia land area). The key barrier is the insufficient streamflow records presented with the most comprehensive global datasets to-date such as GRDC or GSIM (Do et al., 2018a; Gudmundsson et al., 2018a), and thus large-scale hydrologists do not possess a representative sample of streamflow observation (especially for Asia). Current understanding of global flood hazards may therefore be biased toward Europe and North America, making studies similar to the present study very demanding.*

**Response:** We thank the reviewer for this excellent suggestion. We have substantially revised the manuscript, and highlight the missing piece of research on flood hazards over China in the Introduction part (Line 32-36 in the revised manuscript). We clearly describe in the Introduction that “*Due to the limitation of observational datasets, existing knowledge on flood hazards is significantly biased towards Europe and North America, with the characteristics of other worldwide regions far from being well represented*” by following the reviewer’s suggestion. Suggested references have been included where necessary. We further emphasize the contribution of our analysis based on this unprecedented dataset to global-scale flood hydrology at the very end of the manuscript. Thanks!

*(5) If the authors prefer to stay on the current objective (i.e. conducting an analogous study of a previous study), I want to see this objective introduced more prominent (e.g. explain why a nearly identical study was conducted) as it is currently mentioned very vaguely in the introduction (page 2, lines 35-37). This potentially makes a notion that the authors did not give Villarini and Smith (2010) the merits it deserves.*

**Response:** The manuscript has been pre-reviewed by Gabriele Villarini and James Smith before submission. Both of them are long-term collaborators of the leading author for the present study. We extend our thanks to their comments in the Acknowledgement section.

The objective has been revised. The strategy is to target questions that are unique and important to flood hazards over China (see also response to comment #3), even though some of the approaches have been used in Villarini and Smith (2010) and other previous studies. Thanks!

*(6) The authors should also focus on clarifying the technical aspects that were identically repeated and the ones that were done differently (beside different datasets and study areas) – the rationale of these choices should also be discussed. In addition, “distributions” in Villarini and Smith (2010) refer to several terminologies (e.g. spatial, temporal and statistical distributions) and the rationale of using this word was presented adequately in the introduction of that paper. The authors must rethink the key motivation of their study to clarify which “distributions” are the focus of their research and justify why a specific characteristic of flood peaks is chosen (similar to the link between Typhoon Nina and timing of flood peaks currently presented). The loose ties between the “distributions” and the objectives currently made the paper read fragmented and confused.*

**Response:** This is a very good suggestion, and has been adopted in developing the revised manuscript. We clarify the aspects of flood peak distributions that we are planning to focus on at the very beginning of the manuscript. We also note that understandings of these aspects would contribute to improved characterization of flood hazards over China from both statistical and physical perspectives. An important difference of our study from Villarini and Smith (2010) is analysis on the impacts of landfalling tropical cyclones on the upper tails of flood peaks. This is mainly motivated by that facts that some of the most extreme floods in the history of China are associated with tropical cyclones (e.g., Typhoon Nina) and also the unique nature of China’s geographic location on the margin of the most active oceans in Tropical cyclones. These issues have been clarified or emphasized in the Introduction section. Thanks!

*(7) If the authors decide to follow another approach, the study may exclude some analyses (e.g. GEV distribution) to focus more on an aspect of flood hazards (e.g. trends in flood magnitude and timing) and relate the paper findings to previous observation-based studies. As indicated above, with this unprecedented dataset, I believe there are several rooms for analyses and discussions beyond the current strategy (i.e. an analogous study of Villarini and Smith (2010)). There are opportunities for deeper and more critical discussions included in the “Specific comments” section that are applicable if the authors choose this direction.*

**Response:** We thank the reviewer for this critique. The objective has been revised, but still demonstrate the focus of flood hazards. We believe that the upper tail of flood peaks based on GEV framework is an important characteristic of flood hazards, as it represents how extreme floods are statistically distributed. Equally important is the impact of different flood agents on the upper-tail properties. We therefore prefer to keep the analyses in the revised manuscript. The strategy is not to present an analogous study of Villarini and Smith (2010). Please see comments #3, #5, and #6. Thanks!

All the specific comments raised by the reviewer have been properly incorporated in the revised manuscript. Thanks!

*(8) Abstract: This section should be revised significantly to provide a clear synthesis of the objectives, the methods being used and the main findings. The opening sentence reiterates the ambiguous terminology presented in the title (i.e. “flood peak distributions”) without sufficient clarifications in the rest of the abstract. There are several statistical analyses presented with little “hints” about the role of each assessment as well as the links between the results and specific objectives. This shortcoming has led to the notion that the paper is a collection of unrelated analyses (which is not the case when reading further to the main text).*

**Response:** We substantially reconstruct the Abstract by following the reviewer's comments. Thanks!

*(9) Introduction: After reading through the introduction twice, I'm still unclear about "what are the research questions being introduced?", and "what are the key contributions of this study?" The confusions partly come from the loose link between the ideas being presented and the choice of terminologies/wordings that sometimes overcomplicates the ideas. This section must be revised to provide a more synthesized literature review and simplify the ideas where possible. Please also refer to my previous comments for some thoughts about improving the introduction. The authors may find some of the "specific comments" useful as well.*

**Response:** We substantially reconstruct the Introduction section by following the reviewer's comments. The current structure starts with the main objective of this study and a brief introduction of key aspects of flood peak distributions to be examined. We move on to the following paragraphs through literature review that shows existing gap in our knowledge in flood hydrology and hydroclimatology. We conclude the section by raising five questions to be targeted at for the following analysis (Line 88-93). The questions echo with Summary and Conclusions. Thanks!

*(10) Results and Discussions: This section was too "report focused" with very loose connection between individual sub-sections. This led to a notion that the "Results and Discussion" is a compilation of four separate studies. I strongly recommend the authors to remedy this issue and better explain the contribution of each sub-section to the overarching aims. One possible way is to have an "introduction sentence/paragraph" at the beginning of each sub-section to clarify how the subsequent discussion contributes to a better understanding of "flood peak distributions for China".*

**Response:** We thank the reviewer for this critique. We remove the content about changes in flood peak timing, since we decide to just focus on flood peak magnitudes (including long-term changes, seasonality, upper tails etc.) in the present study. The logistic structure of the remain contents is explicitly described at the very beginning of Results and Discussion section (Line 166-173 in the revised manuscript). We also place one or two sentences at the beginning of each subsection to hint on the relationships between the present subsection and previous subsections. Thanks!

*(11) Conclusions: This section reads more "Summary" than "Conclusion". It would be more useful if the authors be more concise in summarizing the key findings and then focus on highlighting (1) what was the contribution of this study to the state-of-understanding for flood hazard (China-wide and global scale) and (2) the fact that collected data set is unprecedented and has much more potentials beyond this study (e.g. adding values to the literature of global scale hydrology). It would be beneficial to also comments on the benefit, challenges and potential of making China streamflow data becomes more FAIR (Findable, Accessible, Interoperable and Reusable; see Wilkinson et al., 2016). Some potential options toward this ambitious goal is to publish metadata and indices (Do et al., 2018b; Gudmundsson et al., 2018b) and even include hydrological variable time series (Addor et al., 2017).*

**Response:** We thank the reviewer for this critique. We substantially reconstructed the Conclusion section in the revised manuscript. We first change the title of this section to "Summary and Conclusions". We highlight the main contribution of our present study to improved understanding on flood hazards across China (e.g.,

long-term changes, upper tails and physical drivers), and emphasize innovative approaches for future flood frequency analysis that can explicitly address the nonstationarities in flood series across China. The role of tropical cyclones in flood hydroclimatology contributes to physical insights into the upper tails of flood peaks across China. We conclude this section (and our paper) by highlighting the further utilization of this exceptional dataset in flood hydrology from a global perspective by following the reviewer's suggestion. Thanks!

*(12) Methodological issues There are some data aspects that should be clarified in Section 2 (or presented in supplementary) as this is the first study to use such dataset, which may be unfamiliar to other hydrologists.*

**Response:** We expand this section by providing more details about the dataset in the revised manuscript. Thanks!

*(13) Data quality statements. The definition of "continuous records of at least 50 years" (e.g. non-missing data consecutively for 50 years) and "Strict quality control procedures are implemented to ensure consistency and accuracy of the records". These aspects are very important on the credibility of detectable trends.*

**Response:** We emphasize this in the revised manuscript by following the reviewer's suggestion. Thanks!

*(14) Filtering criteria related to missing data. Please note that annual value of maximum is very sensitive to missing data. Previous studies usually applied a threshold of number of missing data points per year to assign "N/A" value for a specific year (e.g. station A has 30 missing data points in 1950 so N/A value was assigned for that particular year). If all gauges have zero missing data-point, this feature should be highlighted to show the exceptionally good quality of this dataset.*

**Response:** We thank the reviewer for this critique, and totally agree with this argument. However, we note that the flood records from China demonstrate miscellaneous ways of data collection, rather than based on instantaneous discharge with regular temporal intervals (like most U.S. geological survey stations). However, since the stations are all national control-stations with the highest data quality, various procedures are implemented to make sure each of the annual statistics are reliable and accurate. For some stations, annual maximum is the only available data. We expand the text on quality control in the revised manuscript (Line 99-106). Thanks!

*(15) A graph presents the number of stations with available data over time may be useful. This will also provide an understanding of the uncertainty related to step-change analysis. Figure 2 of Do et al. (2017) is an example for this type of plot.*

**Response:** We add a sub-plot in Figure 2 by following the reviewer's suggestion. Thanks!

*(16) Figure 1 should show the location of "discarded stations" prior to further analyses. It seems to me that the station density reduced significantly in other figures. If all stations showed in Figure 1 were used, please note in the caption. If there are stations removed, the number of stations used/removed for each subsequent*

*analysis should also be mentioned.*

**Response:** Figure 1 shows all the 1120 gauges used throughout the manuscript. We clarify this in the caption. Only stations with results being statistically significant are shown in subsequent figures, which leads to reduced numbers of stations compared to Figure 1. We clarify this in the caption of each subsequent figure. Thanks!

*(17) Additional maps should be added to Figure 1 to show (i) data length, (ii) the beginning and (iii) end of records for each station to complement the subsequent analysis of change-point. For instance, one hypothesized reason for change point detected mostly over 1980-2010 was most stations have streamflow data available for only 1970s onward.*

**Response:** We show record length of each station in Figure 1 using shaded color. We note that approximately 95% stations show end of records after 2016, we therefore prefer not to show this in the map. The beginning of records can also be inferred based on record lengths or Figure 2a (the time series of total number of available stations for each year). Approximately 90% stations have records during the period 1960-2017 instead of from 1970s onward. Thanks!

*(18) Trends analysis: as a China-wide investigation is one of the key motivations of this study, I'm recommending the use of "reference period". The authors may conduct the analysis for only one period (e.g. all stations were assessed for 1969-2019) or different period (e.g. 1980-2010, 1950- 2019, and 1900-2019). This is particular important to remedy data limitation, which could dismiss the usefulness of the detected trends wherever too short records was used to assess trend in floods over a long period (e.g. using 50 years of data to infer changes in floods for a 150-year period).*

**Response:** The trend analysis is based on time series with record lengths exceeding 50 years which should be quite enough to infer robust slowly varying changes in flood peaks. In addition, more than 95% stations extend onward after 2016, with about 90% stations covering the entire period 1960-2017. We believe additional analysis focusing on "reference period" is therefore not necessary. Thanks all the same!

*(19) For Mann-Kendall test: is there any criterion for data length to conduct the analysis (e.g. at least ten data points)? This is relevant for the test conducted for before-step-changes and after-step-changes time series (there may be insufficient data points). I noted that the figures 5b and 5c have different numbers of stations, potentially due to insufficient data points for a specific sub-group?*

**Response:** The reviewer is absolutely correct. Only sub-groups with record lengths exceeding 10 years are used for further trend analysis. We add this information in the revised manuscript (Lines 135). Different numbers of stations in Figure 5b and 5c are partially due to the fact that some of the sub-series do not show statistically significant trends before change points, in contrast to the sub-series after change points. Thanks!

*(20) For flood timing, it is unclear the motivation for assessing trends in this flood index. In addition, it is more useful to use an analysis where the magnitude of changes is visible. The reason is even when changes are significant, it is not practically meaningful if flood timing shifts only a small time-window (e.g. one day*

over 100 years). Theil-Sen slope estimator is a useful statistical technique for this type of analysis (Blöschl et al., 2017).

**Response:** The reviewer is absolutely correct. We decide to remove all the materials pertaining to the trends in flood peak timing from the revised manuscript. We are working on a parallel manuscript that specifically focus on the seasonality of annual flood peaks across China. Thanks!

(21) Title: “Flood Peak Distributions over China” made the notion that “spatial distribution” is the key feature being analyzed (which is not the case).

**Response:** We respectfully disagree with the reviewer on this particular point. We use the word “distributions” similar to Villarini and Smith (2010) by referring to a couple of meanings that include spatial and temporal distribution, seasonal distribution, and statistical distribution. This is also pointed by the reviewer under comment #8. We clarify its meanings in the Abstract and Introduction sections. Thanks all the same!

(22) Line 2: “flood peak distributions across China” in the abstract also made the notion that “spatial distribution” is the key feature being analyzed.

**Response:** We clarify the multiple meanings of “distributions” in the Abstract section. Thanks all the same!

(23) Line 16: the research objectives were “to provide improved understandings on the nature of upper tails of flood peaks and innovative methods for flood frequency analysis in a changing environment”. This statement has two issues: (1) it is unclear what is “the nature of upper tails of flood peaks”? (Any alternative for “upper tails of flood peaks”, which was used quite often across the manuscript?), and (2) “provide innovative methods for flood frequency analysis” indicates the development of a new method, which is not the focus of this paper. The goal should be rewritten.

**Response:** Description on the research objectives has been removed. We note in the revised manuscript that “The ultimate goal of our study is to provide improved characterizations of flood hazard across China from both statistical and physical perspectives”. Thanks!

(24) Line 17: It is unclear how the four presented themes linked to the two objectives.

**Response:** The four themes have been removed in the revised manuscript. Thanks!

(25) Line 26: “staionarity” should be “stationarity”.

**Response:** Done. Thanks!

(26) Line 35: “highlight possible factors that induce the changes” should be clarified: some of potential factors and why did they are chosen?

**Response:** We change it to “highlight potential influencing factors” in the revised manuscript. Thanks!

*(27) Line 36: it is unclear to me what “dominant modes of violation for the stationarity assumption” is. Would there be a simpler way to explain it?*

**Response:** We actually mean “whether abrupt changes or slowly varying trend is the main demonstration of nonstationarities in flood series”. We add “abrupt changes and slowly varying trend” into the context of this sentence, but still prefer to use “dominant mode” for simplicity. The terminology is also used in previous studies (Villarini and Smith, 2010). Thanks!

*(28) Line 37: the final sentence seems out of place. I was expecting a clarification of the “dominant modes...” mentioned in the previous sentence, or justification of why the authors followed Villarini and Smith (2010) rather than Hodgkins et al. (2019).*

**Response:** This sentence has been moved to an earlier place. Due to unavailability of meta-data (including changes in land use/land cover, regulation for each drainage basin), we are unable to attribute the changes in flood series to specific factors as Hodgkins et al. (2019). We are working on developing a meta-data archive for all the gauges, and expect to do analysis as Hodgkins et al. (2019) in future studies. Thanks!

*(29) Line 46: it is unclear what “space-time rainfall organizations” means.*

**Response:** We replace it with “spatio-temporal rainfall variability” in the revised manuscript. Thanks!

*(30) Line 48: I don't think the sub-sequent sections discussed anything related about “the necessity of improved procedures for regional flood frequency analysis with spatial heterogeneity in flood hydroclimatology considered”. Please revise this statement or extend the discussion.*

**Response:** This sentence has been removed in the revised manuscript. Thanks!

*(31) Lines 52: please note that “seasonality” may refer to more than the timing of floods (Villarini, 2016).*

**Response:** We remove “(e.g., seasonality)” in the revised manuscript. Thanks!

*(32) Lines 57-62: please focus more on introducing the mechanisms generating floods across China.*

**Response:** This sentence has been removed in the revised manuscript. We focus on the flood-generation mechanisms in China by following the reviewer's suggestion. Thanks!

*(33) Line 63: it is unclear what “monsoon-related systems” means.*

**Response:** We changed it to “monsoon” in the revised manuscript. Thanks!



*(34) Lines 64-67: these two sentences read out of place.*

**Response:** These sentences have been removed in the revised manuscript. Thanks!

*(35) Line 67-68: this section is repetitive. I'm recommending the authors to link this paragraph to the subsequent one (starting at line 70) as timing of tropical cyclones were then related to flood timing.*

**Response:** These sentences have been removed in the revised manuscript. Thanks!

*(36) Lines 70-92: I found the detail introduction of Typhoon Nina is too disruptive-and a distraction. This is also a reason for confusion about the key research question of this research. If the key motivation was "to examine the impact of tropical cyclone on the upper tail properties of flood peak distribution over China" (line 85; and I think this is a great research question itself), the structure of the manuscript need to be revised to reflect this main research objective. The current manuscript presents the link between floods and tropical storms at the very end (section 4.4), after a very long discussion for other factors (e.g. step-changes, seasonality, GEV...) with almost no "reminder" for readers. At the time I got to section 4.4, I almost forgot the motivation to analyze "Tropical cyclones and upper tail properties" in this study.*

**Response:** We shrink the discussion on Typhoon Nina in the revised manuscript. We substantially reconstruct the Introduction section by summarizing the key research questions we are targeting in the present study. The structure of the Results and Discussion sections has also been reconstructed by connecting each piece of analysis in a better way. Thanks!

*(37) Line 88: I'm not sure why "Results presented in this study can promote a predictive understanding of flood hazards associated with landfalling tropical cyclones"*

**Response:** This sentence has been removed in the revised manuscript. Thanks!

*(38) Line 121: please explain the rationale of applying Mann-Kendall test for two sub-groups and the contribution of this analysis to the main objective.*

**Response:** We note that monotonic trends can be induced by abrupt changes in mean rather than indicating slowly varying trend in the series. We therefore do trend analysis for series without significant change points in mean. For those series with change points in mean, we do trend analysis for two sub-series. MK test for the sub-groups can highlight stations that demonstrate both abrupt changes in mean and slowly varying trend in the entire flood series. We reconstruct this paragraph pertaining to trend analysis in the revised manuscript (Line 128). Thanks!

*(39) Line 124: "significance level of 5%" is for one-tail or two-tail?*

**Response:** It is two-tailed test that we are using throughout the manuscript. We make this clear in the revised manuscript. Thanks!

*(40) Line 125: please justify why circular statistic, a common approach for flood timing investigations (Villarini, 2016; Blöschl et al., 2017; Hall and Blöschl, 2018), was not used in this study to prevent the issues where two flood peaks occurring on calendar day 1 and calendar 365 only have one day difference.*

**Response:** We throw out the analysis on the changes in flood peak timing in the revised manuscript. We are currently working on an ongoing manuscript that specifically focus on the seasonality of annual flood peaks across China, including changes in flood peak timing. Thanks!

*(41) Lines 136-140: this is repetitive (has been mentioned in introduction). The authors should clarify about how to examine the dependence of GEV parameters on drainage area.*

**Response:** We reconstruct this section by deleting the repetitive texts. The dependence is examined based on checking the correlations of three GEV parameters with drainage areas as shown in Figure 9. Thanks!

*(42) Line 145: is there any reference for this choice (i.e. 500km and two weeks).*

**Response:** We add several references in the revised manuscript (Line 155). Thanks!

*(43) Lines 149-155: these information seems irrelevant as only the circulation center location was used. In case the sub-sequent analyses will divide tropical storms into sub-categories (ET/TS), the authors should clarify this technical aspect.*

**Response:** One of the distinctive features of tropical cyclones that produced a large number of flood peaks over China is that they experience extratropical transition during their life cycles. We provide an explicit discussion about this feature in section 4.4 (also see Table 1 for details). We prefer to keep this information in the manuscript. Thanks all the same!

*(44) Line 160: "The majority of stations tend to show smaller values". Please clarify what is "the majority" and how "smaller" the values are (perhaps in %).*

**Response:** There are 398 and 305 stations that exhibit smaller values of mean and variance after than before the change point, respectively. We have clarified this in the revised manuscript (Line 178). We prefer not to provide specific values in the manuscript, as they show considerable variation by stations. Thanks!

*(45) Line 169: "We are able to relate some of the changes in annual flood peaks series to intentional human activities". Please clarify the procedure used to identify these relationships (e.g. metadata inspection?) and what is the magnitude of "some" (e.g. 5% of stations with significant step-change detected?).*

**Response:** The reviewer is correct. The abrupt changes in flood series can be related to intentional human activities based on meta-data analysis. We clarify this in the revised manuscript (Line 187). Due to the limitation of meta-data, we are only able to relate the changes for the four stations shown in Figure 4. We believe these four representative stations demonstrate some of the main facets of human regulations in the flood series, although additional analysis is needed. This calls for additional efforts in data collection and

interpretation, which seems quite challenging at present. Thanks!

*(46) Figure 3: Please also show the locations of gauges with insignificant results. The geographical location of individual stations analyzed in Figure 4 should also be highlighted (e.g. starred symbol).*

**Response:** We thank the reviewer for this suggestion. However, we prefer not to show all the locations, as by doing this the figure will turn a complete mess. We show all the stations in Figure 1 for readers' reference. The difference between Figure 3 and Figure 1 will be stations that show insignificant results. We highlight the locations of the four stations analyzed in Figure 3 using numbers in brackets. Thanks!

*(47) Line 197: this is somewhat expected as changes in climate variables occur quite gradually in general. Previous studies generally link abrupt changes to human interventions rather than natural climate drivers.*

**Response:** This is not entirely true. One of our previous studies found abrupt changes in rainfall series across China (Yang et al., 2013; similarly, also see Gu et al., 2017a). Although we are not quite sure of the drivers (i.e., shift in climate), changes in rainfall can obviously demonstrate themselves in flood series. However, the spatial patterns between changes in rainfall and changes in flood series are not consistent, which lead us to conclude that climate may play a less important role in flood series across China. We do not modify the text. Thanks all the same!

*(48) Line 203: please be careful with your conclusion that “Abrupt change rather than slowly varying trend is a common mode of the violation of the stationarity assumption for the annual flood peak series over China” as both modes of non-stationarity can present at the same station. For instance, “naturalized streamflow records” (e.g. the difference in means between two before/after step-change time series were removed) may reveals gradual change, which is more relevant to climate changes and variabilities. As a result, assessing linear trends over only stations that did not exhibit significant step-change is not sufficient to support this statement.*

**Response:** We thank the reviewer for this critique. Note that we are comparing “abrupt change” vs. “***slowly varying*** trend”, rather than linear trends. Linear trends can be induced by both abrupt change points in mean (as the example of naturalized streamflow series raised by the reviewer) or indicate slowly varying trend for a time series. That is the reason why we detect abrupt change points, and then move on to slowly varying trend detection for those series without significant abrupt changes in mean. We believe our results can support our argument that “abrupt change rather than slowly varying trend is a common mode of the violation of the stationarity assumption across China”. We clarify this in the methodology section of the revised manuscript. Thanks!

*(49) Figure 5b and Figure 5c: please clarify why these two figures have different number of data points. If it is due to statistical insignificance, please also show the location of stations that did not exhibit significant linear trends.*

**Response:** Different numbers of data points between Figure 5b and 5c can be resulted from (1) insufficient record length (less than 10 years) for the sub-series before or after change points, (2) linear trends being not

statistically significant. The figures would turn into a ‘chaos’ after we show all stations. We therefore prefer to only highlight data points that are statistically significant. We add explanations for the difference in the number of stations in the caption of Figure 5. Thanks!

*(50) Line 227: Please note that the findings do not support the statement that “external climate factors (i.e., extreme rainfall), and changes in soil moisture on flood hydrology” leads to flood stationarity.*

**Response:** We rephrase this sentence, and now it reads “Attribution analysis on the nonstationarities of annual flood peaks across China point to mixed controls of human activities, external climate factors (i.e., extreme rainfall), and changes in soil moisture on flood hydrology”. The argument is partially based on comparative analysis between the present study and previous studies that focus on changes in extreme rainfall across China (i.e., Yang et al., 2013, Gu et al., 2017a; 2017b). Thanks!

*(51) Lines 232-235: it is unclear what “state-of-art process-based approaches” and “statistical modelling approaches” are – please clarify. Please also make it clearer why these approaches important to “flood frequency analyses across China” (i.e. how could these approaches address the nonstationarities in flood frequency).*

**Response:** We reconstruct this section to more clearly explain what process-based and statistical modelling approaches really refer to. These innovative approaches can explicitly deal with nonstationarity in flood series which is the case for most stations across China, especially northern China (refer to Figure 3 and Figure 5b). Thanks!

*(52) Section 4.2: maps of the average flood timing and associated concentration (Villarini, 2016) would be a nice addition.*

**Response:** We thank the reviewer for this suggestion. We decide to reserve more details about the seasonality of flood peaks across China to an ongoing study. Thanks!

*(53) Lines 239: “the first peaks”? Considering the distribution of the floods timing (Figure 6), I thought there is only one peak per group?*

**Response:** It should be “the first peak”. We correct this in the revised manuscript. Thanks!

*(54) Lines 240-241: please provide reference.*

**Response:** Done. Thanks!

*(55) Line 252: please clarify how “tropical cyclone floods” defined (this should be presented in methodology).*

**Response:** We have clarified how to associate an annual flood peak with tropical cyclones in the manuscript (i.e., section 3.3). We remind readers by pointing them to the methodology section in the revised manuscript.

Thanks!

*(56) Line 260: forward-reference is not recommended.*

**Response:** We removed these sentences in the revised manuscript. Thanks!

*(57) Lines 265-280: without sufficient evidence of “how many days flood peaks have shifted”, it is hard to justify these statements.*

**Response:** This section has been completely removed in the revised manuscript. Thanks!

*(58) Line 271: “Villarini (2016) found ...” sounds out of place.*

**Response:** We removed this sentence in the revised manuscript. Thanks!

*(59) Lines 273-278: these statements read contradicting to each other.*

**Response:** These sentences have been removed. Thanks!

*(60) Line 287: please clarify why only these stations used (should explain in the methodology).*

**Response:** The requirement of probability theory is the data samples should be identically and independently distributed. We thus only conduct GEV analysis for stations that are show stationary flood records during the study period. We clarify this in methodology section by following the reviewer’s advice (Line 146-147). Thanks!

*(61) Line 312: “contrasting space-time organizations” is unclear. Please clarify.*

**Response:** We replace it with “Spatial contrasts in rainfall climatology between northern and southern China” in the revised manuscript. Thanks!

*(62) Line 343: the presented results only show the impacts of tropical cyclone on flood occurrence rather than “flood peak distributions”.*

**Response:** We respectively disagree with the reviewer on this particular point. Note that we highlight stations with records floods (scatter) together with the frequency of annual flood peaks (shade) induced by tropical cyclones in Figure 10. Record flood is the largest flood peak for the entire record, and points to the upper tail of flood peak distribution. The argument is further supported by testing the dependence of GEV shape parameter on tropical cyclones. We do not modify the text. Thanks all the same!

*(63) Figure 12: please plot also the stations within 500-km distant and the annual maximum streamflow does not coincide with the occurrence of the selected tropical cyclones (i.e. flood timing is outside the two-week*

*threshold) and extend the discussions appropriately (e.g. the proportions of stations influenced by tropical storms).*

***Response:*** We thank the reviewer for this suggestion. However, we prefer not to show all the stations with annual flood peaks not associated with tropical cyclones. We provide a figure below to show that the add-in will make annual-flood-peaks stations less standing-out (Figure R2a). We instead highlight the 500 km buffer zone for each tropical cyclone in the revised manuscript (as the one showed in Figure R2b). We add the number of total storm-affected stations in Table 1, and expand the discussion in the revised manuscript. Thanks!

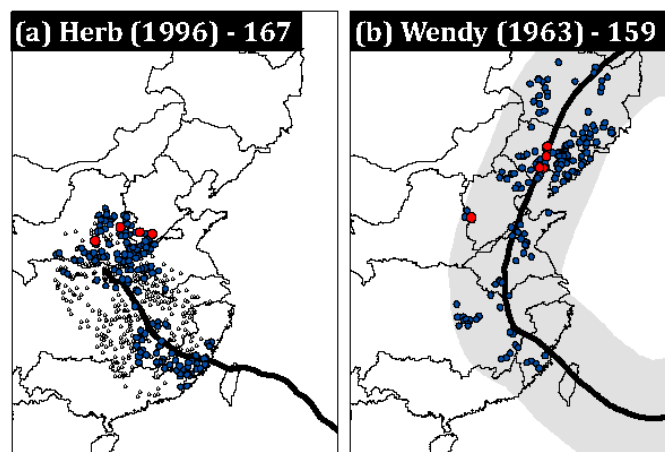

Figure R2. Sample figure to compare visual effects of two ways of dealing with other stations: (a) include all other stations, (b) add a buffer zone.

### ***References***

Yang, L., Villarini, G., Smith, J. A., Tian, F., and Hu, H.: Changes in seasonal maximum daily precipitation in China over the period 1961-2006, *International Journal of Climatology*, 33, 1646–1657, 2013.

Gu, X., Zhang, Q., Singh, V. P., Liu, L., and Shi, P.: Spatiotemporal patterns of annual and seasonal precipitation extreme distributions across China and potential impact of tropical cyclones, *International Journal of Climatology*, 37, 3949–3962, 2017a.

Gu, X., Zhang, Q., Singh, V. P., and Shi, P.: Nonstationarity in timing of extreme precipitation across China and impact of tropical cyclones, *Global and Planetary Change*, 149, 153–165, 2017b.

# On the Flood Peak Distributions over China

Long Yang<sup>1</sup>, Lachun Wang<sup>1</sup>, Xiang Li<sup>2,3</sup>, and Jie Gao<sup>4</sup>

<sup>1</sup>School of Geography and Ocean Science, Nanjing University, Nanjing, Jiangsu province, China

<sup>2</sup>China Institute of Water Resources and Hydropower Research, Beijing, China

<sup>3</sup>State Key Laboratory of Plateau Ecology and Agriculture, Qinghai University, Xining province, China

<sup>4</sup>China Renewable Energy Engineering Institute, Beijing, China

**Correspondence:** Long Yang (yanglong@nju.edu.cn)

**Abstract.** ~~Time series of annual maximum instantaneous peak discharge from~~ Here we for the first time present a nation-wide characterization of flood hazard across China. Our analysis is based on an exceptional dataset of 1120 ~~stations with record lengths of stream gauging stations with continuous records of annual flood peaks for~~ at least 50 years ~~are used to examine across the entire country.~~ Our results are organized by centering on various aspects of flood peak distributions ~~across China.~~

5 ~~Abrupt change rather than slowly varying trend is the dominant mode of the violation of stationary assumption for,~~ including temporal changes in flood series and their spatial variations, statistical distribution of extreme values, and properties of storms that lead to annual flood peaks ~~over China.~~. These aspects altogether contribute to improved understandings of flood hydrology under a changing environment over China, and promote the advance of flood science at the global scale. Historical changes in annual flood peaks demonstrate frequent abrupt changes rather than slowly varying trends. The dominance of decreasing trends

10 ~~in annual flood peak series magnitudes~~ indicates a weakening tendency of flood hazard over China in recent decades. ~~Delayed (advanced) occurrence of annual flood peaks in southern (northern) China point to a tendency for seasonal clustering of floods across the entire country.~~ We model the upper tails of flood peaks based on the Generalized Extreme Value (GEV) distributions ~~for the stationary series, and evaluate the scale-dependent properties of flood peaks. The relations of GEV parameters and drainage area show spatial contrasts.~~ The GEV shape parameter is weakly dependent on drainage area, but shows spatial splits

15 ~~tied to rainfall climatology~~ between northern and southern China. ~~Weak dependence of the GEV shape parameter on drainage area highlights the critical role of space-time rainfall organizations in dictating the upper tails of flood peaks. Landfalling tropical cyclones play~~ Landfalling tropical cyclone plays an important role in characterizing the upper-tail properties of flood peak distributions especially in northern China and southeastern coast, while the upper tails of flood peaks are dominated by extreme monsoon rainfall in southern China. Severe flood hazards associated with landfalling tropical cyclones are character-

20 ized with ~~tropical cyclones experiencing extratropical transition, and persistent moisture transport/interactions with regional topography as demonstrated by Typhoon Nina (1975).~~ complex interactions of storm circulation with synoptic environment (i.e., mid-latitude baroclinic disturbances) and regional topography.

## 1 Introduction

We examine flood peak distributions over China based on 1120 stream gauging stations with continuous records of annual maximum flood peaks for at least 50 years. The ultimate goal of our study is to provide improved ~~understandings on the nature of upper tails of flood peaks and innovative methods for flood frequency analysis in a changing environment.~~ The central themes of this study are (1) stationarity of characterization of flood hazard across China from both statistical and physical perspectives. This involves a comprehensive suite of analyses that investigate temporal nonstationarities in annual flood peaks (for both peak magnitude and timing), (2) mixture of flood-generation systems, (3) spatial heterogeneity of flood peak distributions, and (4) the impacts of tropical cyclones on the upper-tail properties of flood peak distributions, i.e., temporal distribution), flood peak distribution based on extreme value theory (i.e., statistical distribution) and critical factors (in terms of both physiography and climate) that determine the upper tails of flood peaks (i.e., spatial distribution).

Hydrological regimes in most river basins over China, like the rest of the world, have experienced strong anthropogenic influences (i.e., river regulations, land use changes). Human-related impacts on flood hydrology are further complicated by detectable changes in external factors that are critical for flood-generation processes, such as temperature and extreme rainfall, even though it remains unsettled whether the changes are due to natural climate variability or human-induced climate change (e.g., Held and Soden, 2006; Marvel and Bonfils, 2013; Trenberth et al., 2015; Schaller et al., 2016; Risser and Wehner, 2017; Eden et al., 2017). The ~~stationarity~~ stationarity assumption of flood series has been questioned and debated in ~~the~~ scientific community (Milly et al., 2008; Montanari and Koutsoyiannis, 2014; Salas et al., 2018). Extensive studies on the stationarity of annual ~~maximum~~ flood peaks have been carried out in many parts of the world (e.g., Robson et al., 1998; Robson, 2002; Franks and Kuczera, 2002). ~~There are also~~ (e.g., Robson et al., 1998; Robson, 2002; Franks and Kuczera, 2002; Villarini et al., 2009; Petrow and Merz, 2009; Villarini et al., 2010; Arnell and Gosling, 2016; Do et al., 2017, 2018). Due to the limitation of observational datasets, existing knowledge on flood hazard is significantly biased towards Europe and North America, with the characteristics of other worldwide regions (including China) far from being well represented. There are some regional studies across China (e.g., Zhang et al., 2016, 2014, 2018b; Liu et al., 2018). A nation-wide investigation on the stationarity of annual maximum flood peaks in flood series over China, however, is still missing, and is the principal focus of our study. The exceptional dataset of ~~flood records in China~~ annual flood peaks, as demonstrated in ~~the~~ present study, will provide additional evidence for detectable changes in flood ~~series in hydrology~~ under a changing environment. Better understanding of historical changes in annual flood peaks is of paramount importance for constraining model-based projections of flood hazards (e.g., Milly et al., 2002; Hirabayashi et al., 2013; Dankers et al., 2014; Arnell and Gosling, 2016). In this study, we ~~do not aim to do attribution analysis for the changes in annual flood peaks for each river basin (like e.g., Hodgkins et al., 2019), but to highlight possible~~ expect to explore the dominant mode (i.e., abrupt changes or slowly varying trends) of nonstationarities in flood series, and highlight potential factors that induce the changes. ~~Similar with the study by Villarini and Smith (2010) in the eastern United States, we identify the dominant modes of violation for the stationarity assumption in annual maximum in~~ annual flood peaks.



Improved understanding of flood hazard requires essential knowledge of flood-generation mechanisms. This is also a critical aspect to consider for improved flood frequency analysis (Hirschboeck, 1988; Singh et al., 2005; Leonard et al., 2014; Brooks and Day, 2018). Smith et al. (2018) shows that the most extreme flood peaks are frequently determined by extreme events resulted from anomalous flood agents for particular regions of the United States (which is the notion of "strange floods"). Mixture of flood-generation mechanisms poses great challenges for characterizing the upper tails of flood peaks, as different flood agents might lead to flood regimes with distinct statistics (e.g., magnitude, timing, frequency). This is, however, often the case for many regions in the world (e.g., Jarrett and Costa, 1988; Smith et al., 2011; Villarini, 2016; Blöschl et al., 2017; Smith et al., 2018; England et al., 2018). We expect annual flood peaks over China to be characterized with a mixture of flood-generation mechanisms, due to its geographic location in a monsoon-climate region and on the margin of the most active ocean in tropical cyclones. China suffers the most frequent landfalling tropical cyclones in the world, with 9 tropical cyclones making landfall on average per year (Jiang and Jiang, 2014). Despite its significance, little is known about the hydroclimatology of flooding associated with landfalling tropical cyclones. Even less effort has been spent on investigating the impacts of different flood-generation mechanisms on the upper-tail properties of flood peaks across China. This is a critical issue for China that shows contrasting rainfall climatology (under combined influences from monsoon and landfalling tropical cyclones) between the northern and southern part of the country (i.e., traditionally take the Yangtze River as the geographic divide) (e.g., Yang et al., 2013; Gu et al., 2017a; Zhang et al., 2018a). Extreme floods for different regions are often associated with contrasting flood agents. This is not merely associated with the nature of flood agents themselves, but is also determined by complex interplay of storms with ambient synoptic and physiographic environment. For instance, extreme rainfall from landfalling tropical cyclones can be amplified through interactions of storm circulation with mid-latitude baroclinic disturbances (e.g., Hart and Evans, 2000) and regional topography (e.g., Houze, 2012). Propagation of monsoon also plays a role in determining the spatial contrasts of flood agents through regulating temporal occurrences of flood peaks over different regions (e.g., Ding and Zhang, 2009). Knowledge in the mixed flood-generation mechanisms and their spatial variations can provide valuable insights into improved procedures for the estimates of Probable Maximum Precipitation (PMP) / Probable Maximum Flood (PMF) in designing flood-control infrastructures (e.g., Smith and Baeck, 2015; Yang et al., 2017).

We examine the upper tails of flood peaks over China. An important way of characterizing flood hazards is through examining flood peak distributions and factors that determine the upper-tail properties. In this study, we model annual flood peaks based on the statistical framework of the generalized extreme value (GEV) distributions (similarly see e.g., Katz et al., 2002; Morrison and Smith, 2002; Villarini and Smith, 2010; Barros et al., 2014; Bates et al., 2015; Gaume, 2018; Smith et al., 2018). The key focus is placed on the spatial heterogeneity of flood peak distributions over upper tails of flood peaks across China. Previous studies show strong dependence of location and scale parameters for the GEV distributions on drainage area, while the GEV shape parameters only weakly depend on drainage area (Morrison and Smith, 2002; Villarini and Smith, 2010). Weak dependence of the GEV shape parameters on drainage area indicate scale-independent properties of the upper tail of flood peak distributions, and highlight additional factors (e.g., space-time rainfall organizations spatio-temporal

rainfall variability) in determining the upper tails of flood peaks. Yang et al. (2013) identified a spatial contrast of extreme rainfall distributions between northern and southern China and point-pointed to contrasting flood hydroclimatology across the country. We therefore propose that similar spatial contrasts also exist in flood peak distributions across China, and highlight the necessity of improved procedures for regional flood frequency analysis with spatial heterogeneity in flood hydroclimatology considered.

~~In addition to annual maximum flood peak magnitude, we examine the timing of annual maximum flood peak (as represented by day of the year) in this study. Analysis on the timing of annual flood peaks (e.g., seasonality) can shed light on flood-generating mechanisms, and is an important aspect of flood frequency analysis (Hirschboeck, 1988; Singh et al., 2005; Leonard et al., 2014; Brooks and  
Annual flood peaks resulted from different flood-generation mechanisms violate the assumption of homogeneous flood  
population that most conventional methods for flood frequency analysis rely on. This is, however, often the case for many  
regions in the world (e.g., Jarrett and Costa, 1988; Villarini, 2016; Blöschl et al., 2017; Smith et al., 2018; England et al., 2018)  
For instance, flooding in the eastern United States is under mixed controls of extratropical systems and landfalling tropical  
cyclones, with relative importance varies spatially (Smith et al., 2011). The upper-tail properties of flood peak distributions are  
frequently determined by extreme events resulted from anomalous flood agents for particular regions (the notion of “strange floods”, see Smith  
We expect annual flood peaks to be characterized with a mixture of flood-generating mechanisms over China, due to the  
geographic location of China in a monsoon-climate region and on the western margin of the north Pacific basin for tropical  
cyclones. We characterize the relative importance of monsoon-related systems and tropical cyclones in dictating the upper tails  
of flood peaks across China. Consistent changes in flood peak timing over Europe indicate a clear signal of climate impact on  
the seasonality of European flood records (Blöschl et al., 2017). Villarini (2016) does not find a strong signal of temporal  
changes in the seasonality of annual maximum discharge over the continental United States. Changes in the seasonality  
of annual flood peaks across China is still lacking, despite its strong implication for flood hazards and water resources  
management. In this study, we examine changes in the timing of annual maximum flood peak across China, to shed more  
light on the stationarity of annual maximum floods and the changing flood hazards over the country.~~

Our study is also motivated by Typhoon Nina and the resultant August 1975 flood in central China. The August 1975  
flood in central China, with 26000 direct fatalities, is one of the most destructive floods in the world history (Yang et al.,  
2017). The August 1975 flood plays a key role in shaping the envelop curve of floods in China and different versions of  
the world envelop curve (Yang et al., 2017; Costa, 1987). The unit peak discharge is  $17 \text{ m}^3 \text{ s}^{-1} \text{ km}^{-2}$  (which is i.e., flood  
peak discharge divided by drainage area) for a  $760 \text{ km}^2$  drainage basin, and is on the list of the world maximum floods.  
The maximum 6-hour rainfall accumulation of 830 mm is comparable to the world record (840 mm, Teegavarapu, 2013).  
Central China lies in the region with relatively less frequent visits of tropical cyclones in the western North Pacific basin  
(Wu et al., 2005; Jiang and Jiang, 2014). Previous studies show that landfalling tropical cyclones can make great contributions  
to extreme rainfall in inland regions, even though the frequency of occurrence is not as comparative as coastal regions  
(e.g., Zhang et al., 2018a). This is closely linked to a couple of factors, such as the interplay of tropical cyclone and baroclinic  
disturbances (i.e., known as extratropical transition, Hart and Evans, 2000), interactions with mid-latitude systems (e.g., easterly, Shu et al.  
, and impact of regional topography (as demonstrated by Typhoon Nina, Yang et al., 2017). The devastating August 1975 flood

plays a key role in shaping the envelop curve of floods in China and different versions of the world envelop curve (Yang et al., 2017; Costa, 1  
130 ~~. Devastating consequences of Typhoon Nina and the August 1975 flood partially resulted from cascading collapses of dozens  
of dams, and expose inadequacies of conventional approaches for flood frequency analysis (e.g., fitting historical flood records  
with assumed distribution function), and highlight the importance of hydrometeorological approaches for Probable Maximum  
Precipitation (PMP)/Probable Maximum Flood (PMF) analyses for better designs of flood-control infrastructures (e.g., Smith and Baeck, 2  
-In this study, we examine the impact of tropical cyclone on the upper tail properties of flood peak distribution over China.  
We provide characterizations of landfalling tropical cyclones that produced severe historical floods over China, focusing on the  
nature of the storm and relative locations of flood peaks to the circulation center. Results presented in this study can promote a  
predictive understanding of flood hazards associated with landfalling tropical cyclones. This is especially a critical issue over  
135 Chinadue to its high frequency of landfalling tropical cyclones (i.e., with 9.3 tropical cyclones making landfall on average per  
year) (Jiang and Jiang, 2014). Economic functions) (e.g., Smith and Baeck, 2015; Yang et al., 2017). This is an urgent issue  
for China, as statistics show socio-economic damages caused by landfalling tropical cyclones are rapidly increasing in re-  
cent decades across China, with a large portion of the damages resulted from extreme tropical cyclone rainfall and flooding  
(Zhang et al., 2009) riverine flooding (Zhang et al., 2009; Rappaport, 2014).~~

140 ~~The rest of the paper is structured as follows. In section 2, we introduce the dataset of annual maximum flood peaks, followed  
by section~~ Based on the aforementioned gap of our knowledge in flood hydrology, we examine flood peak distributions across  
China by centering on the following questions: (1) What is the dominant mode of the violation of stationarity in annual flood  
peak series? (2) How do dominant flood-generation mechanisms vary across China? (3 ~~for detailed descriptions of methods,  
including change point and trend analyses, Generalized Extreme Value distribution, and association of annual maximum floods  
with particular tropical cyclones. Results and discussions are provided in section 3, followed by summary and conclusions  
in section 4.~~) How do upper-tail properties of flood peak distributions depend on drainage areas (i.e., scale-dependence) and  
rainfall climatology? (4) What is the impact of landfalling tropical cyclones on the upper tails of flood peaks across China? (5)  
150 ~~What are the characteristics of the most severe flood hazards (i.e., as represented by the number of stations with annual flood  
peaks) in the history of China and the tropical cyclones that induce them? Even though these questions are examined based  
on an exclusive dataset over China, timely answers to these questions will undoubtedly contribute to the compliment of our  
limited understandings on flood hazard under a changing environment, and promote the advance of flood science at the global  
scale.~~

## 2 Data

Our analysis is based on observations of annual maximum instantaneous peak discharge from 1120 stream gauging stations with  
155 continuous records of at least 50 years ~~. The longest flood record is 145 years (i.e., no missing data consecutively throughout  
the entire periods). There are relatively more stations distributed in eastern China than the western part of the country (Figure  
1).~~ The dataset is comprehensively collected from local hydrographic offices of nine major river basins across China. All  
these stations are nation-level control stations with ~~little evidence of site re-location during the observational periods. Strict~~

the records that have been through strict quality control procedures ~~are implemented to ensure~~ to ensure data consistency and accuracy of the records. There are relatively more stations distributed in the eastern China than the western part of the country (Figure 1). ~~The record-~~ For instance, the dates of annual maximum flood peak and highest stage should be comparable, with records of missing flood peak timing discarded to ensure data accuracy. Stations with notable site re-locations (i.e., that lead to changes in drainage area) during the observational periods are not included in this dataset. The flood records demonstrate a variety of ways in data collection, mainly include intermittent direct measurements of discharge during flood season, indirect inferences through stage-discharge rating curves, and post-flood field surveys.

Time series of total number of available stations are shown in Figure 2a. The longest flood record is 153 years, with approximately more than 90% stations fully available during the period from 1960 to 2017. The record length of 66% stations exceeds 60 years starting from 1950s till the year of 2017 (Figure 2ab). There are considerable variabilities in the spatial scales of represented river basins, with a large percentage (approximately 64%) of stations representing small and medium river basins (with drainage areas less than 5000 km<sup>2</sup>, Figure 2b)-c). Previous studies found contrasting climate regimes and extreme rainfall distributions between northern and southern China (e.g., Yang et al., 2013; Ma et al., 2015). To facilitate analyses and comparisons, we further classify the 1120 stations into two sub-groups, i.e., northern and southern China, based on their geographic locations (Figure 1). The northern group includes stations mainly in northeastern river basins, the Yellow River basin, the Huaihe River basin, and the Haihe River basin, while the southern group includes southeastern river basins, southwestern river basins, the Yangtze River basin, and the Pearl River basin. ~~Previous studies found contrasting climate regimes and extreme rainfall distributions between northern and southern China (e.g., Yang et al., 2013; Ma et al., 2015)-~~

### 3 Methodology

#### 3.1 Change point and trend analysis

We use the ~~nonparametric non-parametric~~ Pettitt's test (Pettitt, 1979) to examine the presence of abrupt changes in annual flood peak series. Pettitt's test is a rank-based test that relies on the Mann-Whitney statistic to test whether two samples come from the same population. There are no assumed distributions for the test, which makes it less sensitive to outliers and skewed distributions. It allows for the detection of a single change point in mean at an unknown point in time, with the test significance computed using the given formulation. We further apply the Pettitt's test on the squared residuals derived with respect to the local polynomial regression line (loess function, Cleveland, 1979) to detect change point in variance in annual flood peak series (similarly see, e.g., Villarini et al., 2009; Villarini and Smith, 2010; Yang et al., 2013).

~~We use the nonparametric~~ We also adopted a different change-point detection approach, i.e., the one proposed by Matteson and James (2009), but only found negligible deviations from the results based on Pettitt's test (results not shown).

Monotonic trends can be induced by existence of abrupt change points in mean rather than indicating slowly varying trend for the flood series. For those series that do not show significant abrupt change points in mean, we directly use the non-parametric Mann-Kendall test (Mann, 1945; Kendall, 1975) to examine the presence of monotonically increasing or decreasing trends in annual flood peak series. For the series with change point in mean, we divide it into two sub-groups and test monotonic

trends for each of the two sub-groups (i.e., before and after the change point). Additional trend analysis for the sub-series can highlight stations that show both abrupt changes and slowly varying trend in the entire flood series. We assume the existence of only a single change point in mean for each flood peak series in this study, to avoid dividing the series into too many segments  
195 ~~-(similarly see, e.g., Villarini et al., 2009, 2012). Only sub-series with record lengths exceeding 10 years are considered in the trend analysis.~~ We set a significance level of 5% (i.e., two-tailed) for both the change-point and trend tests. ~~Pettitt's test and Mann-Kendall test are further applied in the series of timing of annual maximum flood peaks (represented by day-of-the-year) to investigate changes in flood peak timing across China.~~

### 3.2 Generalized Extreme Value distribution

200 The Generalized Extreme Value (GEV) distribution is used to statistically model distributions of annual maximum flood peaks (e.g., Coles, 2001; Villarini and Smith, 2010). The GEV, based on extreme value theory, has been widely used in flood frequency analysis (e.g., Coles, 2001; Katz et al., 2002; Morrison and Smith, 2002; Villarini and Smith, 2010). The cumulative distribution function of the GEV takes the form:

$$F(x|\mu, \sigma, \xi) = \exp \left\{ - \left[ 1 + \xi \left( \frac{x - \mu}{\sigma} \right) \right]^{-1/\xi} \right\} \quad (1)$$

where  $\mu$ ,  $\sigma$ , and  $\xi$  represents the location, scale, and shape parameter, respectively. The location ( $\mu$ ) and scale ( $\sigma$ ) parameter is  
205 related to the magnitude and variability of the records, respectively. The shape parameter ( $\xi$ ) indicates the tail properties of the distribution, with positive (negative) values pointing to heavy and unbounded (light and bounded) upper ~~tails-tail~~ of flood peak distribution. The GEV parameters are estimated based on the maximum likelihood estimators (e.g., Coles, 2001). We fit the GEV distributions only for stations without statistically significant change points in mean and variance and monotonic trends.

~~We examine the dependence of GEV parameters on drainage area. Villarini and Smith (2010) examined annual flood peaks in the eastern US, and found a strong dependence of location and scale parameter on drainage area, while the shape parameter only shows a weak dependence on drainage area (Villarini and Smith, 2010). We further test whether or not drainage area can explain the spatial variability of GEV parameters over-~~ following the basic assumption of probability theory that data samples should be independent and identically distributed. The three fitted GEV parameters (i.e., location, scale and shape) will be further used to examine their correlations with drainage areas, shedding light on the scale-dependence of the upper-tail  
215 properties of flood peak distributions across China.

### 3.3 Association of flood peaks with tropical cyclones

We associate an annual flood peak of a given stream gauging station with a particular tropical cyclone ~~following procedures in Villarini and Smith (2010) and Smith et al. (2011)~~ by following the procedures, i.e., if the center of a tropical cyclone is within 500 km of the gauging station during a time window of two weeks centered on the occurrence time of the flood peak. The  
220 ~~thresholds (500 km and two weeks)~~ spatial and temporal thresholds reflect the mean spatial extent of tropical cyclone rainfall (e.g., Rios Gaona et al., 2018), and the upper limit of flood response time ~~in the representing river basins~~ (similarly also see, e.g., Hart and E  
. We obtain the information of tropical cyclones ~~for the west Pacific basin~~ from the International Best Track Archive for Climate

Stewardship (IBTrACS, see <https://www.ncdc.noaa.gov/ibtracs/> for details). The dataset provides records of the circulation center location (latitude and longitude) and storm intensity (represented by minimum sea level pressure) at a temporal interval of 6  
225 hours. An additional attribute provided by IBTrACS for each tropical cyclone at each time interval is the nature of the storm, i.e., extratropical transition (~~ET~~) or tropical storm (~~TS~~). Extratropical transition (ET) characterizes the changing properties of a tropical cyclone from a warm-core, symmetric structure to a cold-core, asymmetrical structure (e.g. Hart and Evans, 2000). Physical process associated with extratropical transition plays an important role in determining the spatial distribution of tropical cyclone rainfall (e.g. Hart and Evans, 2000; Atallah and Bosart, 2003; Atallah et al., 2007; Liu and Smith, 2016)(e.g. Atallah and Bosart, 2003; At  
230 . Tropical storm (TS), as a contrast, indicates the maintenance of a warm-core, symmetric structure during the entire life cycle of the storm.

## 4 Results and discussion

The structure of this section is organized as follows. We first detect change points and monotonic trends to shed light on the long-term changes in flood series across China, and discuss possible drivers that induce them (subsection 4.1). We move on to  
235 subsection 4.2 to examine seasonal distribution of annual flood peaks, highlighting the mixture of flood-generation mechanisms across China and its spatial variation. Results from both subsection 4.1 and 4.2 will serve the basis for the analysis of subsection 4.3 that delves into the upper-tail properties of flood peak distributions across China, focusing on the spatial distributions of the GEV parameters as well as their dependence on drainage areas and rainfall climatology. Subsection 4.4 will specifically examine the impacts of tropical cyclones on extreme floods, to shed light on the statistical and physical characteristics of most  
240 extreme floods in the history of China.

### 4.1 Stationarity ~~for flood peak magnitude~~

#### 4.1.1 Abrupt changes

Figure 3 shows the results of change-point analyses for annual flood ~~peak magnitudes-peaks~~ based on the Pettitt's test. There are 436 (38%) and 398 (35%) stations with significant change points in mean and in variance, respectively. 27% stations show  
245 change points both in mean and in variance. The majority of stations tend to show smaller values in mean ~~and/or variance after~~ (383 stations) and variance (305 stations) after than before the change point (figure not shown). Change points in both mean and variance show striking spatial concentration in northern China (i.e., the lower Yellow River basin, the upper Huaihe River basin, and the entire Haihe River basin). Change points in both mean and in variance are frequently observed during the period 1980-2000, with slightly larger frequency of occurrence during the period 1990-2000. We observe an additional amount of  
250 change points in mean distributed in the downstream of southwestern river basins and in the upper and middle portion of the Yangtze River and Pearl River basins (Figure 3a). These change points tend to occur in the period 2000-2010 instead of the period of dominant change-point occurrence in northern China.

Spatial and temporal clustering of change points demonstrate evidence of anthropogenic influences on flood hydrology (e.g., Vogel et al., 2011; Hodgkins et al., 2019). ~~We~~ Through meta-data inspection of selected stations, we are able to relate some of the abrupt changes in annual flood peaks ~~series~~ to intentional human activities. For instance, the change point in mean at the year of 1986 in the upper Yellow River, the Guide hydrological station, is due to the construction of a large hydropower-generation dam, the Longyangxia Dam (Figure 4a). The Longyangxia Dam is a multi-purpose dam (e.g., flood control, water supply), and controls runoff variability of the entire Yellow River basin (Si et al., 2019). The Guide station is approximately 30 km downstream of the Longyangxia Dam. There are a couple of other hydrological stations distributed further downstream (e.g., Xunhua hydrological station, 120 km downstream), and show change points in mean around the year of 1986 for the annual flood peak series. Anthropogenic regulations on rivers in northern China (especially the middle/lower portion of the Yellow River basin and the upper Haihe River basin) is often characterized with a cascade construction of small reservoirs. We show a flood peak series in the upper Haihe River basin that experienced significant decrease in annual maximum flood peak magnitudes (smaller values both in mean and variance after the change point) around early 1990s, associated with extensive construction of small reservoirs due to an increased demand for irrigation and domestic water supply (Figure 4b). The impact of regulation by dams or reservoirs on flood hydrology has been discussed and debated in previous studies (e.g., Yang et al., 2008; Barros et al., 2014; Ayalew et al., 2017; Lu et al., 2018) (e.g., Yang et al., 2008; Barros et al., 2014; Zhang et al., 2010). For instance, Smith et al. (2010) found limited impacts of dams on flood hydrology in the Delaware River basin, which is not the case for the upper Yellow River basin in our study. This might be related to contrasting physiographic properties of the river basins and/or functions of the dams, and needs further analysis.

Changes in land use/land cover (e.g., urbanization, deforestation/afforestation) can also contribute to change points in the series of annual flood peaks. This is especially the case for stations in the lower Haihe River basin (where the Beijing-Tianjin-Hebei metropolitan region is distributed) and Yangtze River delta region (where Shanghai and other major cities are located). Figure 4c shows a small urban watershed in the lower Yangtze River basin) that experienced rapid urbanization in recent decades. ~~Trans-boundary water transfer~~ Transboundary water-transfer project demonstrates another form of anthropogenic influence on flood hydrology. Abrupt increases in flood peak magnitudes are mainly tied to the elevated base flows transferred from ~~neighbouring~~ neighboring river basins. We provide the annual flood peak series for a station in the lower Yellow River basin (Figure 4d). Increasing water demand from domestic and agricultural sectors in the lower Yellow River basin lead to extensive implementation of water-transfer projects.

Abrupt changes in the series of annual flood peaks can also originate from the changes in extreme rainfall across China. ~~One~~ However, one of our previous studies investigated changes in annual maximum daily rainfall over China, but found no clear signature of spatial clustering for change points in either mean or variance for the rainfall series, although abrupt changes in annual maximum daily rainfall frequently ~~occur~~ occurred in the 1990s (see Figure 2 in Yang et al., 2013). Inconsistent spatial patterns of change points in annual maximum flood peak and annual maximum daily rainfall series ~~may~~ indicate a weak signal role of climate shifts in producing abrupt changes in annual flood peaks.

#### 4.1.2 Monotonic trends

We further examine the monotonic trends of annual flood peak series based on the Mann-Kendall test for those stations that do not show significant change points in mean. There are only 69 stations (accounting for approximately 6% of the total stations) with significant linear trends (Figure 5a). For those stations with significant linear trends, 62 (7) of them exhibits decreasing (increasing) trends. The 62 stations are uniformly distributed across the entire country, indicating a weakening tendency of annual maximum flood peaks over China in recent decades. Abrupt change rather than slowly varying trend is a common mode of ~~the~~-violation of the stationarity assumption for the annual flood peak series over China. For those stations with significant change points in mean, we test the ~~linear~~-linear trends for each sub-series of flood peaks before and after the change point. Almost all stations show decreasing trends for the sub-series either before or after the change point with only a few exceptions (Figure 5b and 5c). Similar with change points in mean and in variance, stations with significant decreasing trends after change points spatially concentrate in northern China, especially the middle and lower portion of the Yellow River basin and the upper Haihe River basin. The decreasing trend in the middle and lower portion of the Yellow ~~river~~-River is most likely due to the implementation of soil conservation practices in its tributary regions (e.g., Bai et al., 2016). There are few stations in southern China that show significant linear trends either before or after change points.

Changes in annual rainfall extremes (i.e., annual maximum daily rainfall) show a “dipole-like” spatial structure over China, with decreasing trends in northern China and increasing trends in the south (e.g., Yang et al., 2013; Ma et al., 2015; Gu et al., 2017b). The decreasing annual maximum flood peaks in northern China may be partially attributed to the weakening rainfall intensity in recent decades. The opposite trends in annual rainfall extremes and annual maximum flood peaks in southern China seem contradictory to our perception. Contrasting trends between intense rainfall and annual high flows are also found over United States (mainly eastern of the Mississippi River), which are attributed to inconsistent changes of intense rainfall in different seasons (Small et al., 2006), i.e., changes in fall precipitation mainly contributes to the trend in annual rainfall extremes, while annual high flows are often observed in spring with no significant changes in rainfall. This is, however, not the case for southern China. Changes in rainfall extremes among all four seasons are dominated by significant or relatively weak increasing trends over southern China (Gu et al., 2017b). Disconnections between changes in annual maximum rainfall and annual flood peaks are also identified in other previous studies (e.g., Ivancic and Shaw, 2015; Berghuijs et al., 2016; Wasko and Nathan, 2019), and point to the additional roles of antecedent watershed wetness and changes in space-time rainfall properties in dominating flood-generation processes (i.e., storm extent, Sharma et al., 2018). Disconnection of changes in rainfall extremes and ~~flood~~-floods as exhibited for the gauges across southern China highlight the complex drivers for flood-generation process, and ~~is worthwhile for~~-merits further investigation.

~~Analysis on the stationarity of annual flood peaks across China point to mixed controls of human activities, external climate factors (i.e., extreme rainfall), and changes in soil moisture on flood hydrology. We note that further attribution analysis can provide additional insights into flood drivers and their changes, but can be challenging. The homogeneity of flood population for flood frequency analysis need to be carefully revisited in a changing environment. This is especially proposed by England et al. (2018) in Hydrology Subcommittee Bulletin 17C as an imminent need to “define flood potentials~~



320 for watersheds altered by urbanization, wildfires, deforestation, and by reservoirs". Our results highlight the importance of state-of-art process-based approaches (e.g., Wright et al., 2014; Yu et al., 2018) and statistical modeling approaches (Salas et al., 2018; Ser for flood frequency analyses-

## 4.2 Mixture of flood-generation mechanisms

325 Long-term changes in annual flood peak series highlight the need for better understanding on flood-generation mechanisms across China, especially for northern China that exhibits an overwhelming frequency of stations with nonstationarities.-

## 4.3 Seasonality of annual flood peaks

~~We examine which can be pursued through the examination of~~ seasonal distribution of annual flood peaks ~~to highlight the mixture of flood-generating systems over China.~~ There are three (two) distinct peaks in the seasonal distribution of annual flood peaks for southern (northern) China (Figure 6). The first ~~peaks peak~~ for both southern and northern China occur around late April, but are resulted from different ~~flood-generating systems. Frequent occurrence~~ flood-generation mechanisms. Frequent occurrences of annual flood peaks around late April in southern China are observed mainly in the southeastern coast, and are caused by frontal systems or associated with early onset of the East Asia Summer Monsoon (e.g., Ding and Chan, 2005; Ding and Zhang, 2009). The April peak of flood frequency in northern China is contributed by localized storm events associated with mid-latitude weather systems in the northwestern part of the country, or related to snow melt in high-altitude regions (Ding and Zhang, 335 2009). The East Asia Summer Monsoon onsets around early May over mainland China, and moves stepwise northward/northeastward driven by the West Pacific Subtropical High (e.g., Ding and Chan, 2005; Zhang et al., 2017). The monsoon system is characterized with "two abrupt northward jumps and three stationary periods", and plays a deterministic role in the seasonal distribution of flood peaks in both northern and southern China. Frequent flood peaks around late June in the middle and lower portion of the Yangtze River basin contribute to the second peak of seasonal distribution of flood frequency in southern China. Further 340 northward propagation of the monsoon system leads to frequent annual flood peaks in northern China around late July and early August. The summer monsoon retreats back to the south and is weakened afterwards, transferring the dominance in ~~flood-generating flood-generation~~ systems to tropical cyclones and post-monsoon synoptic systems.

Annual flood peaks that are caused by tropical cyclones show a very sharp seasonal distribution, with 70% of them observed in August alone (Figure 6, see section 3 for the association of annual flood peaks with a tropical cyclone). Strong 345 pressure gradients along the western flank of the West Pacific Subtropical High provide favorable synoptic conditions for large-scale moisture transport and ~~north-westward~~ northwestward propagation of tropical cyclones. Interactions of tropical cyclones with mid-latitude systems (e.g., mid-latitude upper-level trough) and regional topography (i.e., Qinling and ~~Tainhang~~ Taihang Mountains) can further enhance ~~tropical eyelone rainfall~~ extreme rainfall associated with landfalling tropical cyclones and the resultant flooding over ~~eastern China~~ (e.g., Svensson and Berndtsson, 1996; Yang et al., 2017; Gu et al., 2017a) China 350 (mainly the eastern part of the country, e.g., Svensson and Berndtsson, 1996; Yang et al., 2017; Gu et al., 2017a). The seasonal distribution of annual flood peaks in northern China is almost overlapped with that of flood peaks caused by tropical cyclones, while tropical cyclones mainly contribute to the third peak of the seasonal distribution for annual flood peaks in

southern China (Figure 6). The concurrency of monsoon-controlled storm events and tropical cyclones is a key element of flood hydro-meteorology and hydroclimatology in eastern China. As we will further demonstrate in section 4.4, even though landfalling tropical cyclones are relatively more frequent in southern China, annual flood peaks caused by relatively infrequent tropical cyclone visits play a vital role in determining the upper tail properties of flood peak distributions in northern China. Monsoon-related extreme rainfall dominates the upper tail of flood peaks in southern China.

Figure ?? shows stations with significant change points in mean and monotonic trends for the series of annual flood peak timing. Compared to flood peak magnitude, flood peak timing exhibits weak decadal variations. There is a considerably small number of stations with significant change points in mean (and in variance, figure not shown) for flood peak timing. For those stations with significance, they show similar spatial concentration with that for flood peak magnitude (Figure ??a). Abrupt changes in flood peak timing tend to occur during the period 1980-1990, consistent with what we previously found for the annual maximum daily rainfall series over China (Yang et al., 2013). There is a notable spatial split in terms of monotonic trends for flood peak timing, with decreasing (increasing) trends in northern (southern) China (Figure ??b). Villarini (2016) found limited impact of urbanization and river regulations on the average timing of flooding across the continental United States, even though the strength of seasonality is weakened. Delayed occurrence of annual flood peaks is consistent with changes in the seasonality of heavy precipitation across China related to the delayed occurrence of annual maximum daily rainfall in southern China (Gu et al., 2017b). Previous studies show that later onset of East Asia Summer Monsoon and intensified rainfall during the monsoon and post-monsoon season might have leads to the changing seasonality of extreme rainfall over China (Day et al., 2018). Changes in flood peak timing can be resulted from changes in both rainfall and antecedent soil moisture, but are not necessarily related to changes in annual peak rainfall. Contrasting changes in the timing of annual flood peaks point to a tendency for a more centralized hydroclimatology across China Analysis on the seasonal distribution of annual flood peaks over the entire country through minimizing the current shift of seasonal distributions highlight contrasting rainfall climatology between northern and southern China (as presented in Figure 6). Changes in the flood peak timing highlight the necessity of revisiting operation rules for multi-objective dams (i.e., flood-control, hydropower, irrigation, water supply) across China. For instance, reservoir managers in southern China possibly need to consider to delay the release of water storage in reservoirs so that sufficient water be maintained for irrigation and domestic water use. A centralized seasonal distribution of annual flood peaks calls for coordinated flood-control practices across the as well as mixture of flood-generation mechanisms across the entire country.

### 380 4.3 Generalized Extreme Value ~~distribution~~Distribution

We model distributions of annual flood ~~peak magnitudes~~peaks using the GEV distribution. We only focus on the stations without significant change points in mean or in variance, and without significant monotonic trends ~~(i.e., the stationary stations)~~. There are 486 stations that satisfy these requirements. These stations are densely located in southern rather than northern China (Figure 7), mostly due to the spatial clustering of stations with abrupt change points in annual flood peaks in northern China (Figure 3). The stationary stations represent a wide range of spatial scales of ~~river drainage~~basins for both northern and southern China. Figure 8 shows the dependence of GEV parameters on drainage area for the 486 stationary stations. Location

and scale parameters are positively correlated with drainage area in a log-log domain. The correlations are all significant at the level of 5%. The shape parameter, however, generally decreases with drainage area but shows only weak dependence in a log-log domain (~~no statistical significance~~with a correlation coefficient of -0.15 for northern China and -0.16 for the south, ~~neither being statistically significant~~). The ~~upper-tail~~ ~~upper-tail~~ properties (as represented by the shape parameter) of flood peak distributions are weakly determined by drainage ~~area~~ ~~areas~~, while the magnitude and variability of annual flood peaks can be well explained by drainage area. Our results are consistent with the study in the eastern ~~US~~ ~~United States~~ by Villarini and Smith (2010), and contribute to generalized ~~understandings on the upper tails~~ ~~understanding on the upper-tail properties~~ of flood peak distributions.

395 An interesting finding ~~for annual flood peaks over China~~ is that there are striking spatial splits in terms of the dependence of the GEV parameters on drainage ~~area~~ ~~areas~~ between northern and southern China (Figure 8). The location and scale parameters for stations in southern China are consistently larger than their counterparts in the north (with a few exceptions, Figure 8a and 8b). The shape parameters in northern China are comparatively larger than that in southern China. Large shape parameters indicate heavier upper tails of flood peak distributions in northern than southern China, even though the magnitudes and variability of flood peaks are relatively smaller in the north. One of our previous studies on the distribution of annual maximum daily rainfall found similar spatial splits for the dependence of GEV parameters on elevation between northern and southern China (~~Yang et al., 2013~~) (~~see also a most recent study by Gu et al., 2017a~~) (~~Yang et al., 2013; Gu et al., 2017a~~). Spatial splits in extreme rainfall distributions highlight spatial heterogeneity in flood hydroclimatology across China (~~which is also represented by the contrasting seasonal distributions of annual flood peaks shown in section 4.2~~). Spatial contrasts of extreme rainfall distribution further lead to different ~~relations between the~~ ~~relationships between~~ three GEV parameters and drainage ~~area~~ ~~areas~~ for flood peak distributions between northern and southern China. ~~Regional flood frequency analysis should explicitly address the spatial splits through considering spatial heterogeneity in flood hydroclimatology.~~

We further show the spatial splits for the shape parameter in Figure 7. The majority of the northern stations show positive shape parameters, while ~~the~~ southern stations are mixed with both negative and positive shape parameters. ~~Contrasting space-time rainfall organizations~~ ~~Spatial contrast in rainfall climatology between northern and southern China~~ seems to be a more effective predictor in explaining the spatial variability of ~~the shape parameter~~ ~~shape parameter rather~~ than drainage area. Our results highlight the importance of hydrometeorological analyses for better characterizations of the ~~upper-tail properties of flood peak distributions~~ ~~physical processes that lead to most extreme floods~~ (similarly see e.g., Smith and Baeck, 2015; Yang et al., 2017). Positive shape parameters in northern China indicate flood peak distributions with unbounded upper tails, while negative shape parameters for most southern stations ~~show flood peak distributions with upper bounds~~ ~~are characterized with a bounded upper tail of flood peak distribution~~. Understandings remain poor pertaining to the nature of the upper ~~tails of flood peak distributions~~ ~~(e.g., Smith et al., 2018)~~ ~~tail of flood peaks~~ (see detailed discussion in e.g., Smith et al., 2018). The bounded upper ~~tails of flood peak distributions~~ ~~tail of flood peaks~~ in the south can be associated with physical constrains over ~~river drainage~~ basins (for instance, large dams for flood-control purposes) and/or the upper bounds to the ~~hydroclimatological processes~~ (see, e.g., Enzel et al., 1993; O'Connor et al., 2002; Serinaldi and Kilsby, 2014) ~~hydrometeorological processes~~ (e.g., Enzel et al.

#### 4.4 Tropical cyclones and upper ~~tail properties~~ tails of flood peaks

~~In this section, we focus on tropical cyclones and their impacts on~~ We examine the impacts of tropical cyclones on the upper-tail properties of flood peak distributions across China in this subsection. As mentioned in previous sections, some of the most extreme floods in the history of China are associated with landfalling tropical cyclones in the western North Pacific basin (e.g., Typhoon Nina). Better characterizations of tropical cyclones and flood hazards associated with them can provide physical insights into the upper-tail properties of flood peak distributions ~~over China.~~

Tropical cyclones contribute to approximately 18% of annual flood peaks over China. Figure 9 shows the map of the percentage of annual flood peaks that are caused by tropical cyclones to total annual flood peaks for each station. More than 50% of the annual flood peaks are caused by tropical cyclones in the southeastern coast of China, with the percentage even attaining 90% over the Hainan Island. The percentage gradually decreases when we move further inland and to higher latitudes. Less than 10% annual flood peaks can be associated with landfalling tropical cyclones in the middle portion of the Yellow River and Yangtze River basins (Figure 9). The percentage of annual flood peaks caused by tropical cyclones is closely tied to the spatial distribution of tropical cyclone rainfall and frequency of tropical cyclone occurrence over China (Wu et al., 2005; Ren et al., 2010; Gu et al., 2017b) (Wu et al., 2005; Ren et al., 2010; Gu et al., 2017b). More than 30% of the extreme rainfall events are induced by tropical cyclones along the coastal regions (Gu et al., 2017a, b) (Gu et al., 2017a, b), with the percentage gradually decreased moving inland due to rapid weakening of storm intensity (e.g., surface roughness, insufficient moisture transport).

We further show the stations with record floods (i.e., the largest flood peak for the entire record of a station) that are caused by tropical cyclones in Figure 9 to highlight the impacts of tropical cyclones on the most extreme floods. Stations with record floods caused by tropical cyclones are spatially clustered in the southeastern coast, central and northeastern China (Figure 9). Tropical cyclone-induced record floods in the southeastern coast are mainly associated with abundant moisture and energy supply for extreme rainfall right after tropical cyclones making landfall. However, the spatial clustering of record floods by tropical cyclones in northern China (more specifically, the upper Huaihe River and northeastern China) can be partially related to extratropical transition processes during the life cycle of the storm and/or interactions with regional topography (i.e., Taihang and Qinling Mountains), as will be elaborated below. We do not observe a comparable distribution of record floods caused by tropical cyclones in southern China (e.g., the Yangtze River basin) excluding the coastal regions, even though the percentage of annual flood peaks caused by tropical cyclone is comparable to that in northern China (less than 30%, Figure 9). Our results highlight the impacts of tropical cyclones on flood peak distributions in northern China with a large percentage of record floods caused by relatively infrequent visits of landfalling tropical cyclones.

The ~~impacts~~ impact of tropical cyclones on the upper tail properties of flood peak distributions ~~are~~ is further examined through the shape parameter of the GEV distribution. We compare the shape parameters between the entire annual flood peak series and the series with annual flood peaks caused by tropical cyclones removed (Figure 10). We focus on the series with record length exceeding 30 years after annual flood peaks caused tropical cyclones being removed from the series. This leads to the exclusion of most stations in the southeastern coast due to the high percentage of tropical cyclone-induced annual flood

peaks (Figure 9). As can be seen from Figure 10, the scatters are generally distributed along the 1:1 line, indicating overall small changes in the shape parameters between two series. However, if we restrict our attention to the stations with record floods caused by tropical cyclones (mainly those stations in northern China), we observe significantly smaller shape parameters (see the insert box plot in Figure 10) for the series with annual flood peaks caused by tropical cyclones removed. Smaller shape parameter implies a lighter tail of flood peak distribution. Small variations in the shape parameters as demonstrated for the rest of the stations indicate relatively weak impacts of tropical cyclones on the upper tail properties of flood peak distributions. These stations are mainly located in inland regions of southern China. Our results are different from the study of Villarini and Smith (2010) in eastern United States that shows significant decreases in shape parameters for the majority of stations when annual flood peaks caused by tropical cyclones are removed from the series. The differences are tied to contrasting flood-generation mechanisms between China and the eastern [US-United States](#). Tropical cyclones and extratropical systems play central roles in the mixture of flood-generation mechanisms for the flooding in the eastern [US-United States](#) (Smith et al., 2011). Extreme rainfall associated with East Asia Summer Monsoon, rather than landfalling tropical cyclones, can be a more important player in characterizing the upper ~~tails~~-tail of flood peak distributions in most inland regions of southern China (e.g., the middle and lower portion of the Yangtze River basin) (Zhang et al., 2017). Tropical cyclones in northern China, even though characterized with low frequency of occurrence, pose significant influences on the ~~upper-tail~~-[upper-tail](#) properties of flood peak distributions. ~~Contrasting roles of tropical cyclones in flood peak distributions highlight the necessity of tailored procedures for flood control practices and flood hazard assessment across China. For instance, landfalling tropical cyclones can be good candidates for PMP/PMF designs for river basins in northern rather than southern China.~~

We focus on tropical cyclones that produced relatively large numbers of flood peaks over China, to shed light on the physical attributes of [most severe](#) flood hazards associated with ~~landfalling~~-[landfalling](#) tropical cyclones. There are 9 tropical cyclones that produced more than 100 annual flood peaks over China since late 1950s till present. The 9 tropical cyclones alone contribute to approximately 50% of total annual flood peaks caused by tropical cyclones. ~~Figure 11 and Table 1 provide~~ [Table 1 provides](#) a summary of the 9 tropical cyclones. Typhoon Herb (1996) produced the largest number of annual flood peaks (167 in total), followed by Typhoon Wendy (1963) and Typhoon Tim (1994). Typhoon Herb (1996) produced a large number of annual flood peaks right after its landfall in mainland China (Figure 11a). Almost all the annual flood peaks caused by other tropical cyclones are distributed over the most inland regions (Figure 11). [The percentage of stations with annual flood peaks caused by tropical cyclones relative to total storm-affected stations \(i.e., located within 500 km buffer zone of each tropical cyclone track\) varies between 14% \(Typhoon Doris\) and 35% \(Typhoon Herb\). Typhoon Andy \(1982\) and Typhoon Russ \(1994\) lead to annual flood peaks for more than 30% storm-affected stations \(Table 1\).](#)

The 9 tropical cyclones can be further categorized into two groups according to the nature of the storm and spatial patterns of their tracks. The first group includes Typhoon Herb (1996), Typhoon Andy (1982), and Typhoon Nina (1975). The three tropical cyclones did not experience extratropical transition during the entire life cycle of the storms, and are characterized with two landfalls (i.e., Taiwan and mainland China). The tracks of these three tropical cyclones do not fall into the prevailing tropical cyclone tracks in the Western North Pacific basin (Wu et al., 2005). Typhoon Nina (1995) produced the largest number of record floods (24 in total) among all historical tropical cyclones over China, followed by Typhoon Polly (1960) (14 in total)

and Typhoon Andy (1982) (10 in total). Annual flood peaks and record floods caused by tropical cyclones in the first group are frequently observed in northern China (mainly the middle portion of the Yellow River and the upper Huaihe River basins). This region is characterized with complex terrain (i.e., Taihang and Qinling Mountains). Interactions of tropical cyclones with regional topography can significantly enhance rainfall intensity through orographic lifting, as demonstrated by Typhoon Nina (1975). For instance, historical records of extreme rainfall (e.g., three-day rainfall accumulation exceeding 1000 mm) from Typhoon Nina (1975) were observed in the windward topographic regions (Yang et al., 2017). The other 6 tropical cyclones in Table 1 are categorized into the second group (Figure 11). A common feature for the tropical cyclones in the second group is extratropical transition process during the life cycle of the storms. Annual flood peaks are frequently observed after the extratropical transition process (see the curvatures of tropical cyclone tracks in the latitudes around 30° in Figure 11), and are frequently observed in northern China. Except Typhoon Herb (1996), 4 of the top 5 largest number of annual flood peaks are caused by tropical cyclones with extratropical transition.

There are no strong preferences for the spatial distribution of annual flood peaks with respect to storm tracks (i.e., left or right of the track), even though the records floods caused by tropical cyclones tend to be frequently observed in the left-front quadrant (typically the down-shear side) of the circulations. This is related to the preferable distribution of extreme tropical cyclone rainfall, due to enhanced moisture convergence and updraft on the down-shear side of the circulation (e.g., Atallah et al., 2007; Shu et al., 2018). Future studies need to investigate variabilities in the physical properties of river basins (i.e., drainage area, slope, shape) and their relationships with flood peaks (i.e., frequency and magnitude) caused by tropical cyclones, to shed more light on flood hazards associated with landfalling tropical cyclones over China.

## 5 Summary and Conclusions

In this study, we examine flood peak distributions over China based on 1120 stream gauging stations with continuous records of annual maximum instantaneous discharge for more than 50 years. The principal findings of this study can be summarized as follows.

(1) There are 38% and 35% stations exhibiting significant change points in mean and in variance, respectively. Change points tend to occur during the period 1980-2000, and show strong a spatial concentration in the lower Yellow River, upper Huaihe River, the entire Haihe River, upper Yangtze and Pearl River basins. Hydrological regimes in these regions demonstrate intensive anthropogenic influences, for instance, large hydropower-generation dam hydro-power generation dams, cascade constructions of small-capacity reservoirs, trans-boundary water transfer transboundary water-transfer projects, soil-water conservation projects, urbanization. There is a weak signal of climate impacts on the abrupt changes in annual flood peaks series across China. Abrupt change is the dominant mode of the violation of violation of the stationary assumption for annual flood peaks over China.

(2) Approximately 6% stations (69 in total) show significant linear trends in the annual flood peak series. Those stations with significant trends are uniformly distributed across the country, with 62 of them exhibiting significantly decreasing trends. The decreasing trends of flood peak magnitude in northern China may be at least partially tied to changes in extreme rainfall.

Disconnections between changes in annual rainfall extremes and annual maximum floods are identified in southern China, and highlight complex flood-generation processes across China. The dominance of decreasing trends in annual flood peak series indicates weakening tendencies of severe flood hazards (i.e., annual maximum floods) over China, even though flood-affected area and economic damages are on the rise in recent decades (Kundzewicz et al., 2019). Future studies need to further examine changes in flood frequency for a complete assessment on flood hazards (based on peaks-over-threshold flood series, similarly see, e.g., Mallakpour and Villarini, 2015).

(3) ~~Flood-generation systems over China show a mixture of East Asia Summer Monsoon, tropical cyclones, and extratropical systems. There is a temporal shift in the seasonal distribution of flood peaks between northern and southern China. Compared to flood peak magnitude, there are fewer stations exhibiting significant change points and/or linear trends in flood peak timing. For those stations with significant linear trends in flood peak timing, the decreasing trends tend to occur in northern China, while the opposite is true for southern China. Changes in flood peak timing tend to minimize the shift of seasonal distribution of annual flood peaks between northern and southern China, leading to centralized seasonality of annual maximum floods over China.~~

(4) ~~We fitted~~ We fit GEV distribution for the stationary time series of annual flood peaks, and examined the dependence of its parameters on drainage area. We ~~found~~ find that the location and scale parameters are linearly scaled with drainage area in a log-log domain. There is only a weak tendency for the shape parameters to decrease as a function of drainage area. Our results ~~are consistent with previous studies, and~~ highlight scale-independent properties of upper tails of annual flood peaks. The relationships between GEV parameters and drainage area show strong spatial splits between northern and southern China, indicating space-time rainfall organization as an important player in determining the upper-tail properties of flood peak distributions over China. Procedures for regional flood frequency analysis ~~over China~~ should explicitly address spatial ~~the~~ spatial splits through considering spatial heterogeneity in flood hydroclimatology.

(5) ~~4) Flood-generation systems over China show a mixture of monsoon, tropical cyclones, and extratropical systems.~~ Tropical cyclone plays an important role in characterizing spatial-temporal variability of flood peaks and the upper-tail properties of flood peak distributions over China. More than 50% of the annual flood peaks in the southeastern coast are caused by tropical cyclones. The percentage progressively decreases when we move further inland and to higher latitudes. Tropical cyclones lead to heavier tails of flood peak distributions (with larger shape parameters of the GEV distribution) in northern China. Those regions are characterized with record floods frequently associated with tropical cyclones, despite that tropical cyclone visits relatively infrequently compared to the southern China. Record floods in southern China are more frequently associated with monsoon-related extreme rainfall ~~events rather than~~ rather than landfalling tropical cyclones. We highlight the importance of considering the mixture of ~~flood-generating~~ flood-generation mechanisms in flood frequency analyses especially in northern China. Contrasting roles of tropical cyclones in flood peak distributions highlight the necessity of tailored procedures for flood-control practices and flood hazard assessment across China. For instance, landfalling tropical cyclones can be good candidates for PMP/PMF designs for drainage basins in northern rather than southern China.

(6) ~~5) Tropical cyclone plays an important role in most severe flood hazards in the history of China.~~ There are 9 tropical cyclones that produced more than 100 annual flood peaks over China. ~~The 9 tropical cyclones contribute,~~ contributing to

approximately 50% of total annual flood peaks caused by all historical tropical cyclones. ~~Large~~ The large number of annual  
560 flood peaks is associated with extended spatial coverages of extreme rainfall after the storms going through the processes  
of extratropical transition. ~~It can also be~~ An additional feature for severe flood hazards is tied to favorable synoptic set-up for  
persistent moisture transport after the storm making landfall, as demonstrated by Typhoon Herb (1996), Typhoon Andy (1982),  
and Typhoon Nina (1975). Interaction of tropical cyclone with regional topography (~~i.e., Taihang and Qinling Mountains~~) is a  
key element for ~~severe flood hazards~~ most extreme floods in central China (mainly the middle/lower Yellow River basin and  
565 upper Huaihe River basin). Annual flood peaks caused by tropical cyclones do not show strong spatial ~~preferenee~~ preferences  
with respect to the ~~track~~ tracks, even though the record floods tend to be frequently observed in the left-front quadrant of the  
circulation. ~~Typhoon Nina (1975) produced the largest number of record floods, and plays a critical role in shaping the envelope~~  
~~curve of floods over China. Hydrometeorological analyses can provide improved characterization on the physical attributes of~~  
~~flood hazards associated with~~ Hydrometeorological analyses can provide improved physical characterization on severe flood  
570 hazards associated with landfalling tropical cyclones (see e.g., Yang et al., 2017).

Attribution analysis on the nonstationarities of annual flood peaks across China point to mixed controls of human activities,  
external climate factors (i.e., extreme rainfall), and changes in soil moisture on flood hydrology. The homogeneity of flood  
population for flood frequency analysis needs to be carefully revisited in a changing environment. This is especially proposed by  
England et al. (2018) in Hydrology Subcommittee Bulletin 17C as an imminent need to “define flood potentials for watersheds  
575 altered by urbanization, wildfires, deforestation, and by reservoirs”. Innovative approaches that explicitly address the nonstationarities  
should be embraced for flood frequency analysis across China, for instance, process-based approaches that rely on physically-based  
hydrological modelling which can represent the processes of nonstationarities in flood series (see e.g., Wright et al., 2014; Yu et al., 2018)  
, statistical modelling approaches that mathematically parametrize the role of human regulations in flood series based on the  
framework of probability theory (Salas et al., 2018; Serago and Vogel, 2018; Gao et al., 2019; Dong et al., 2019; Barth et al., 2019)  
580 . These approaches should be especially in great needs for northern China that exhibits an overwhelming portion of stations  
with nonstationarities in flood series.

Our results highlight the important role of landfalling tropical cyclones (~~e.g., Yang et al., 2017~~) in determining the upper tails  
of flood peak distributions across China, especially the northern China and the southeastern coast. Previous studies show strong  
teleconnections between ~~the activities of tropical cyclones over~~ tropical cyclone activity in the western North Pacific basin and  
585 large-scale ~~atmospheric forcing~~ climate variability, e.g., the El Niño-Southern Oscillation (~~ENSO, e.g., Chan and Shi, 1996; Chan, 2000~~)  
(~~e.g., Chan and Shi, 1996; Chan, 2000~~), Madden-Julian Oscillation (~~MJO, Kim et al., 2008~~) (~~e.g., Kim et al., 2008~~). Statistical  
models that adopt varying parameters on time or other predictors (such as, large-scale climate indices) can provide predictive  
tools of understanding future changes in flood hazards associated with landfalling tropical cyclones (e.g., Zhang et al., 2018c).  
Future studies need to ~~investigate the linkage between tropical cyclone floods and remote atmospheric forcing (similarly see, e.g., Aryal et al.~~  
590 ~~to better understand decadal changes in flood hazards~~ zoom into watershed scales, and explore physical connections between  
extreme flood processes and key tropical cyclone features (e.g., space-time structures of tropical cyclone rainfall, tropical  
cyclone intensity), to provide additional insights into flood hazard associated with landfalling tropical cyclones ~~over~~ China.



595 A unique feature of our study is a nation-wide assessment of flood hazard based on an unprecedented network of stream gauging stations across China. Comprehensive analysis based on the exceptional dataset over China, together with studies by Villarini et al. (2009) and Burn and Whitfield (2018) in North America, Blöschl et al. (2017, 2019) in European countries, among others, promotes improved understandings on flood hydrology and hydroclimatology under a changing environment from a global perspective. A future endeavor will further exploit the dataset through developing a data archive of key hydrological indices that is accessible to worldwide research community.

600 *Data availability.* The data used in this research are collected from distributed hydrological offices of major river basins over China. The dataset is unavailable to access due to licensing issues at the moment.

*Author contributions.* L.Y. designed the study and carried out the analysis. L.Y. wrote the manuscript with the contribution of L. W. All authors contributed to the discussion and revision.

*Competing interests.* The authors declare that they have no conflict of interest.

605 *Acknowledgements.* This research is supported by the Strategic Priority Research Program of the Chinese Academy of Sciences (XDA230402). LX acknowledges support from the National Science Foundation of China (51609256) and the Young Elite Scientists Sponsorship Program by the China Association for Science and Technology (2017QNRC001). The authors would like to acknowledge Gabriele Villarini from the University of Iowa and James Smith from Princeton University for pre-review comments, Dr. Hong Do and the other anonymous reviewer for review comments, which substantially improve the manuscript. The authors would like to extend sincere thanks to colleagues and collaborators from hydrographic offices of major river basins ~~for their contribution to the~~ across China for their exceptional contribution to this dataset.

610

## References

- Arnell, N. W. and Gosling, S. N.: The impacts of climate change on river flood risk at the global scale, *Climatic Change*, 134, 387–401, 2016.
- Aryal, Y. N., Villarini, G., Zhang, W., and Vecchi, G. A.: Long term changes in flooding and heavy rainfall associated with North Atlantic tropical cyclones : Roles of the North Atlantic Oscillation and El Niño-Southern Oscillation, *Journal of Hydrology*, 559, 698–710, 2018.
- 615 Atallah, E., Bosart, L. F., and Aiyyer, A. R.: Precipitation distribution associated with landfalling tropical cyclones over the Eastern United States, *Monthly Weather Review*, 135, 2185–2206, 2007.
- Atallah, E. H. and Bosart, L. F.: The Extratropical Transition and precipitation distribution of Hurricane Floyd (1999), *Monthly Weather Review*, 131, 1063–1081, 2003.
- Ayalew, T. B., Krajewski, W. F., Mantilla, R., Wright, D. B., and Small, S. J.: Effect of spatially distributed small dams on flood frequency: insights from the Soap Creek watershed, *Journal of Hydrologic Engineering*, 22, 04017 011, 2017.
- 620 Bai, P., Liu, X., Liang, K., and Liu, C.: Investigation of changes in the annual maximum flood in the Yellow River basin, China, *Quaternary International*, 392, 168–177, 2016.
- Barros, A. P., Duan, Y., Brun, J., and Medina, M. A.: Flood nonstationarity in the Southeast and Mid-Atlantic regions of the United States, *Journal of Hydrologic Engineering*, 19, 05014 014, 2014.
- 625 Barth, N. A., Ph, D., Villarini, G., Ph, D., White, K., and Ph, D.: Accounting for Mixed Populations in Flood Frequency Analysis : Bulletin 17C Perspective, *Journal of Hydrologic Engineering*, 24, 1–12, 2019.
- Bates, N. S., Smith, J. A., and Villarini, G.: Flood response for the watersheds of the Fernow Experimental Forest in the central Appalachians, *Water Resources Research*, 51, 4431–4453, 2015.
- Berghuijs, W. R., Woods, R. A., Hutton, C. J., and Sivapalan, M.: Dominant flood generating mechanisms across the United States, *Geo-*
- 630 *physical Research Letters*, 43, 4382–4390, 2016.
- Blöschl, G., Hall, J., Parajka, J., Perdigão, R. A. P., Merz, B., Arheimer, B., Aronica, G. T., Bilibashi, A., Bonacci, O., Borga, M., Ivan, Č., Castellarin, A., and Chirico, G. B.: Changing climate shifts timing of European floods, *Science*, 357, 588–590, 2017.
- Blöschl, G., Hall, J., Viglione, A., Perdigão, R., Parajka, R., Merz, B., Lun, D., Arheimer, B., Aronica, G., Bilibashi, A., Boháč, M., Bonacci, O., Borga, M., Čanjevac, I., Castellarin, A., Chirico, G., Claps, P., Frolova, N., Ganora, D., Gorbachova, L., Gül, A., Hannaford, J.,
- 635 Harrigan, S., Kireeva, M., Kiss, A., Kjeldsen, T., Kohnová, S., Koskela, J., Ledvinka, O., Macdonald, N., Mavrova-Guirguinova, M., Mediero, L., Merz, R., Molnar, P., Montanari, A., Murphy, C., Osuch, M., Ovcharuk, V., Radevski, I., Salinas, J., Sauquet, E., Šraj, M., Szolgay, J., Volpi, E., Wilson, D., Zaimi, K., and Živković, N.: Changing climate both increases and decreases European floods, *Nature*, 573, 108–111, 2019.
- Brooks, F. and Day, C. A.: Analyzing the Mixed Flood Hydroclimatology of the Red River Basin, Kentucky, *Journal of the Kentucky*
- 640 *Academy of Science*, 75, 47–52, 2015.
- Burn, D. H. and Whitfield, P. H.: Changes in flood events inferred from centennial length streamflow data records, *Advances in Water Resources*, 121, 333–349, 2018.
- Chan, J. C.: Tropical Cyclone Activity over the Western North Pacific Associated with El Niño and La Niña Events, *Journal of Climate*, 13, 2960–2972, 2000.
- 645 Chan, J. C. and Shi, J. E.: Long-term trends and interannual variability in tropical cyclone activity over the western North Pacific, *Geophysical Research Letters*, 23, 2765–2767, 1996.

- Cleveland, W.: Robust locally weighted regression and smoothing scatterplots, *Journal of the American Statistical Association*, 74, 829–836, 1979.
- Coles, S.: *An introduction to statistical modeling of extreme values*, Springer, London, 2001.
- 650 Costa, J. E.: A comparison of the largest rainfall-runoff floods in the United States with those of the People’s Republic of China and the world, *Journal of Hydrology*, 96, 101–115, 1987.
- Dankers, R., Arnell, N. W., Clark, D. B., Falloon, P. D., Fekete, B. M., Gosling, S. N., Heinke, J., Kim, H., Masaki, Y., Satoh, Y., Stacke, T., Wada, Y., and Wisser, D.: First look at changes in flood hazard in the Inter-Sectoral Impact Model Intercomparison Project ensemble, *Proceedings of the National Academy of Sciences*, 111, 3257–3261, 2014.
- 655 Day, J. A., Fung, I., and Liu, W.: Changing character of rainfall in eastern China, 1951–2007, *Proceedings of the National Academy of Sciences*, 115, 2016–2021, 2018.
- Ding, Y. and Chan, J. C. L.: The East Asian summer monsoon: an overview, *Meteorology and Atmospheric Physics*, 89, 117–142, 2005.
- Ding, Y. and Zhang, J.: *Torrential Rains and Flashing Floods*, Meteorological Press, 2009.
- Do, H. X., Westra, S., and Leonard, M.: A global-scale investigation of trends in annual maximum streamflow, *Journal of Hydrology*, 552, 660 28–43, 2017.
- Do, H. X., Zhao, F., Westra, S., Leonard, M., Gudmundsson, L., Chang, J., Ciais, P., Gerten, D., Gosling, S. N., Schmied, H. M., Stacke, T., Stanislas, B. J. E., and Wada, Y.: Historical and future changes in global flood magnitude & evidence from a model-observation investigation, *Hydrology and Earth System Sciences Discussions*, pp. 1–31, 2019.
- Dong, Q., Zhang, X., Lall, U., Sang, Y.-f., and Xie, P.: An improved nonstationary model for flood frequency analysis and its implication to 665 the Three Gorges Dam, China, *Hydrological Sciences Journal*, 0, 02626 667.2019.1596 274, 2019.
- Eden, J. M., Wolter, K., Otto, F. E. L., Harvey, H., Environ, A., and Lett, R.: Attribution of extreme rainfall from Hurricane Harvey, August 2017, *Environmental Research Letters*, 12, 2017.
- England, J. F., Cohn, T. A., Faber, B. A., Stedinger, J. R., Thomas Jr., W. O., Veilleux, A. G., Kiang, J. E., and Mason Jr., R. R.: Guidelines for determining flood flow frequency—Bulletin 17C, Tech. rep., Reston, VA, <https://doi.org/10.3133/tm4B5>, <http://pubs.er.usgs.gov/publication/tm4B5>, 2018.
- 670 Enzel, Y., Ely, L. L., House, P. K., Baker, R., and Webb, R. H.: Paleoflood Evidence for a Natural Upper Bound to Flood Magnitudes in the Colorado River Basin basin, *Water Resources Research*, 29, 2287–2297, 1993.
- Feng, X. and Shu, S.: How Do Weak Tropical Cyclones Produce Heavy Rainfall When Making Landfall Over China, *Journal of Geophysical Research: Atmospheres*, 123, 11,830–11,848, 2018.
- 675 Franks, S. W. and Kuczera, G.: Flood frequency analysis: evidence and implications of secular climate variability, New South Wales, *Water Resources Research*, 38, 1–7, 2002.
- Gao, S., Liu, P., Pan, Z., Ming, B., Guo, S., Cheng, L., and Wang, J.: Incorporating reservoir impacts into flood frequency distribution functions, *Journal of Hydrology*, 568, 234–246, 2019.
- Gaume, E.: Flood frequency analysis: The Bayesian choice, *Wiley Interdisciplinary Reviews: Water*, 5, e1290, 2018.
- 680 Gu, X., Zhang, Q., Singh, V. P., Liu, L., and Shi, P.: Spatiotemporal patterns of annual and seasonal precipitation extreme distributions across China and potential impact of tropical cyclones, *International Journal of Climatology*, 37, 3949–3962, 2017a.
- Gu, X., Zhang, Q., Singh, V. P., and Shi, P.: Nonstationarity in timing of extreme precipitation across China and impact of tropical cyclones, *Global and Planetary Change*, 149, 153–165, 2017b.

- Hart, R. E. and Evans, J. L.: A climatology of the extratropical transition of Atlantic tropical cyclones, *Journal of Climate*, 14, 546–564, 685 2000.
- Held, I. M. and Soden, B. J.: Robust Responses of the Hydrological Cycle to Global Warming, *Journal of Climate*, 19, 1–14, 2006.
- Hirabayashi, Y., Mahendran, R., Koirala, S., Konoshima, L., Yamazaki, D., Watanabe, S., Kim, H., and Kanae, S.: Global flood risk under climate change, *Nature Climate Change*, 3, 816–821, 2013.
- Hirschboeck, K. K.: Flood hydroclimatology, in: *Flood Geomorphology*, edited by Baker, V. R., Kockel, R. C., and Patton, P. C., pp. 27–49, 690 John Wiley, New York, 1988.
- Hodgkins, G., Dudley, R., Archfield, S., and Renard, B.: Effects of climate, regulation, and urbanization on historical flood trends in the United States, *Journal of Hydrology*, 2019.
- Houze, R.: Orographic Effects on Precipitating Clouds, *Reviews of Geophysics*, pp. 1–47, 2012.
- Ishak, E. H., Rahman, A., Westra, S., Sharma, A., and Kuczera, G.: Evaluating the non-stationarity of Australian annual maximum flood, 695 *Journal of Hydrology*, 494, 134–145, 2013.
- Ivancic, T. J. and Shaw, S. B.: Examining why trends in very heavy precipitation should not be mistaken for trends in very high river discharge, *Climatic Change*, 133, 681–693, 2015.
- Jarrett, R. D. and Costa, J. E.: Evaluation of the flood hydrology in the Colorado Front Range using precipitation, streamflow, and paleoflood data for the Big Thompson River basin, Tech. rep., <https://doi.org/10.3133/wri874117>, <http://pubs.er.usgs.gov/publication/wri874117>, 700 1988.
- Jiang, F. and Jiang, B.: Study on impacts of typhoon on China and its characteristics, *Yangtze River*, 45, 1–5, 2014.
- Katz, R. W., Parlange, M. B., and Naveau, P.: Statistics of extremes in hydrology, *Advances in Water Resources*, 25, 1287–1304, 2002.
- Kendall, M.: Rank correlation methods, Charles Griffin, London, 1975.
- Kim, J. H., Ho, C. H., Kim, H. S., Sui, C. H., and Park, S. K.: Systematic variation of summertime tropical cyclone activity in the western 705 North Pacific in relation to the Madden-Julian oscillation, *Journal of Climate*, 21, 1171–1191, 2008.
- Kundzewicz, Z., Su, B., Wang, Y., Xia, J., Huang, J., and Jiang, T.: Flood risk and its reduction in China, *Advances in Water Resources*, <https://doi.org/10.1016/j.advwatres.2019.05.020>, <https://linkinghub.elsevier.com/retrieve/pii/S0309170818308339>, 2019.
- Leonard, M., Westra, S., Phatak, A., Lambert, M., Hurk, B. V. D., McInnes, K., Risbey, J., Jakob, D., and Stafford-smith, M.: A compound event framework for understanding extreme impacts, *WIREs Clim Change*, 5, 113–128, 2014.
- 710 Liu, M. and Smith, J. A.: Extreme rainfall from landfalling tropical cyclones in the Eastern United States: Hurricane Irene (2011), *Journal of Hydrometeorology*, 17, 2883–2904, 2016.
- Liu, S., Huang, S., Xie, Y., Wang, H., Leng, G., Huang, Q., Wei, X., and Wang, L.: Identification of the Non-stationarity of Floods: Changing Patterns, Causes, and Implications, *Water Resources Management*, 2018.
- Lu, W., Lei, H., Yang, D., Tang, L., and Miao, Q.: Quantifying the impacts of small dam construction on hydrological alterations in the 715 Jiulong River basin of Southeast China, *Journal of Hydrology*, 567, 382–392, 2018.
- Ma, S., Zhou, T., Dai, A., and Han, Z.: Observed changes in the distributions of daily precipitation frequency and amount over China from 1960 to 2013, *Journal of Climate*, 28, 6960–6978, 2015.
- Mallakpour, I. and Villarini, G.: The changing nature of flooding across the central United States, *Nature Climate Change*, 5, 250–254, 2015.
- Mann, H. B.: Nonparametric tests against trend, *Econometrica*, 13, 245–259, 1945.
- 720 Marvel, K. and Bonfils, C.: Identifying external influences on global precipitation, *Proceedings of the National Academy of Sciences*, 110, 19 301–19 306, 2013.

- Matteson, D. S. and James, N. A.: A nonparametric approach for multiple change point analysis of multivariate data, *Journal of the American Statistical Association*, 109, 334–345, 2014.
- 725 Mediero, L., Santillán, D., Garrote, L., and Granados, A.: Detection and attribution of trends in magnitude , frequency and timing of floods in Spain, *Journal of Hydrology*, 517, 1072–1088, 2014.
- Milly, P. C. D., Wetherald, R. T., Dunne, K. A., and Delworth, T. L.: Increasing risk of great floods in a changing climate, *Nature*, 415, 4–7, 2002.
- Milly, P. C. D., Bentacourt, J., Falkenmark, M., Robert, M., Hirsch, R. M., Kundzewicz, Z. W., Lettenmaier, D. P., and Stouffer, R. J.: Stationarity is dead: whither water management? , *Science*, 319, 573–574, 2008.
- 730 Montanari, A. and Koutsoyiannis, D.: Modeling and mitigating natural hazards: Stationarity is immortal!, *Water Resources Research*, 50, 9748–9756, 2014.
- Morrison, J. E. and Smith, J. A.: Stochastic modeling of flood peaks using the generalized extreme value distribution, *Water Resources Research*, 38, 2002.
- O’Connor, J. E., Grant, G. E., and Costa, J. E.: The Geology and Geography of Floods, *Ancient Floods Mod. Hazards*, 5, 359–385, 2002.
- 735 Petrow, T. and Merz, B.: Trends in flood magnitude, frequency and seasonality in Germany in the period 1951-2002, *Journal of Hydrology*, 371, 129–141, 2009.
- Pettitt, A. N.: A non-parametric approach to the change-point problem, *Applied Statistics*, 1, 126–135, 1979.
- Rappaport, E. N.: Fatalities in the united states from atlantic tropical cyclones: New data and interpretation, *Bulletin of the American Meteorological Society*, 95, 341–346, 2014.
- 740 Ren, F., Wu, G., Wang, X., and Wang, Y.: Changes in tropical cyclone precipitation over China, *Indian Ocean Tropical Cyclones and Climate Change*, 33, 25–28, 2010.
- Rios Gaona, M. F., Villarini, G., Zhang, W., and Vecchi, G. A.: The added value of IMERG in characterizing rainfall in tropical cyclones, *Atmospheric Research*, 209, 95–102, 2018.
- Risser, M. D. and Wehner, M. F.: Attributable Human-Induced Changes in the Likelihood and Magnitude of the Observed Extreme Precipitation during Hurricane Harvey, *Geophysical Research Letters*, 44, 12,457–12,464, 2017.
- 745 Robson, A. J.: Evidence for trends in UK flooding, *Philosophical Transactions of the Royal Society A: Mathematical, Physical and Engineering Sciences*, 360, 1327–1343, 2002.
- Robson, A. J., Jones, T. K., Reed, D. W., and Bayliss, A. C.: A study of national trend and variation in UK floods, *International Journal of Climatology*, 18, 165–182, 1998.
- 750 Salas, J. D., Obeysekera, J., and Vogel, R. M.: Techniques for assessing water infrastructure for nonstationary extreme events: a review, *Hydrological Sciences Journal*, 63, 325–352, 2018.
- Schaller, N., Kay, A. L., Lamb, R., Massey, N. R., Van Oldenborgh, G. J., Otto, F. E., Sparrow, S. N., Vautard, R., Yiou, P., Ashpole, I., Bowery, A., Crooks, S. M., Hausteine, K., Huntingford, C., Ingram, W. J., Jones, R. G., Legg, T., Miller, J., Skeggs, J., Wallom, D., Weisheimer, A., Wilson, S., Stott, P. A., and Allen, M. R.: Human influence on climate in the 2014 southern England winter floods and their impacts, *Nature Climate Change*, 6, 627–634, 2016.
- 755 Serago, J. M. and Vogel, R. M.: Parsimonious nonstationary flood frequency analysis, *Advances in Water Resources*, 112, 1–16, 2018.
- Serinaldi, F. and Kilsby, C. G.: Rainfall extremes : Toward reconciliation after the battle of distributions, *Water Resources Research*, 50, 336–352, 2014.

- Sharma, A., Wasko, C., and Lettenmaier, D. P.: If Precipitation Extremes Are Increasing, Why Aren't Floods?, *Water Resources Research*, 54, 8545–8551, 2018.
- 760 Shu, S., Feng, X., and Wang, Y.: Essential role of synoptic environment on rainfall distribution of landfalling tropical cyclones Over China, *Journal of Geophysical Research: Atmospheres*, 123, 11,285–11,306, 2018.
- Si, Y., Li, X., Yin, D., Li, T., and Cai, X.: PT State Key Laboratory of Simulation and Regulation of Water Cycle in River Basin , China Institute of, Science of the Total Environment, 682, 1–18, 2019.
- 765 Singh, V. P., Wang, S. X., and Zhang, L.: Frequency analysis of nonidentically distributed hydrologic flood data, *Journal of Hydrology*, 307, 175–195, 2005.
- Small, D., Islam, S., and Vogel, R. M.: Trends in precipitation and streamflow in the eastern U.S.: Paradox or perception?, *Geophysical Research Letters*, 33, 2–5, 2006.
- Smith, J. A. and Baeck, M. L.: "Prophetic vision, vivid imagination": The 1927 Mississippi River flood, *Water Resources Research*, 51, 9127–9140, 2015.
- 770 Smith, J. A., Baeck, M. L., Villarini, G., and Krajewski, W. F.: The hydrology and hydrometeorology of flooding in the Delaware River basin, *Journal of Hydrometeorology*, 11, 841–859, 2010.
- Smith, J. A., Villarini, G., and Baeck, M. L.: Mixture distributions and the hydroclimatology of extreme rainfall and flooding in the Eastern United States, *Journal of Hydrometeorology*, 12, 294–309, 2011.
- 775 Smith, J. A., Cox, A. A., Baeck, M. L., Yang, L., and Bates, P.: Strange floods: the upper tail of flood peaks in the United States, *Water Resources Research*, 54, 6510–6542, 2018.
- Svensson, C. and Berndtsson, R.: Characterization of extreme rainfall in an East Asian monsoon-climate catchment in the upper reaches of the Huai River, China, *International Journal of Climatology*, 16, 321–337, 1996.
- Tan, X. and Gan, T. Y.: Nonstationary analysis of annual maximum streamflow of Canada, *Journal of Climate*, 28, 1788–1805, 2014.
- 780 Teegavarapu, R. S. V.: *Floods in a Changing Climate: Extreme Precipitation*, Cambridge University Press, 2013.
- Trenberth, K. E., Fasullo, J. T., and Shepherd, T. G.: Attribution of climate extreme events, *Nature Climate Change*, 5, 725–730, 2015.
- Villarini, G.: On the seasonality of flooding across the continental United States, *Advances in Water Resources*, 87, 80–91, 2016.
- Villarini, G. and Smith, J. A.: Flood peak distributions for the eastern United States, *Water Resources Research*, 46, 1–17, 2010.
- Villarini, G., Serinaldi, F., Smith, J. A., and Krajewski, W. F.: On the stationarity of annual flood peaks in the continental United States during 785 the 20th century, *Water Resources Research*, 45, 1–17, 2009.
- Villarini, G., Smith, J. A., Serinaldi, F., and Ntelekos, A. A.: Analyses of seasonal and annual maximum daily discharge records for central Europe, *Journal of Hydrology*, 399, 299–312, 2011.
- Villarini, G., Smith, J. A., Serinaldi, F., Ntelekos, A. A., and Schwarz, U.: Analyses of extreme flooding in Austria over the period 1951-2006, *International Journal of Climatology*, 32, 1178–1192, 2012.
- 790 Villarini, G., Goska, R., Smith, J. A., and Vecchi, G. A.: North atlantic tropical cyclones and U.S. flooding, *Bulletin of the American Meteorological Society*, 95, 1381–1388, 2014.
- Vogel, R. M., Yaindl, C., and Walter, M.: Nonstationarity: Flood magnification and recurrence reduction factors in the united states, *Journal of the American Water Resources Association*, 47, 464–474, 2011.
- Wasko, C. and Nathan, R.: Influence of changes in rainfall and soil moisture on trends in flooding, *Journal of Hydrology*, 795 <https://doi.org/10.1016/j.jhydrol.2019.05.054>, <https://linkinghub.elsevier.com/retrieve/pii/S0022169419304998>, 2019.

- Wright, D. B., Smith, J. A., and Baeck, M. L.: Flood frequency analysis using radar rainfall fields and stochastic storm transposition, *Water Resources Research*, 50, 191–203, 2014.
- Wu, L., Wang, B., and Geng, S.: Growing typhoon influence on east Asia, *Geophysical Research Letters*, 32, 1–4, 2005.
- 800 Yan, L., Xiong, L., Liu, D., Hu, T., and Xu, C.-Y.: Frequency analysis of nonstationary annual maximum flood series using the time-varying two-component mixture distributions, *Hydrological Processes*, 89, 69–89, 2017.
- Yan, L., Xiong, L., Ruan, G., Xu, C.-Y., Yan, P., and Liu, P.: Reducing uncertainty of design floods of two-component mixture distributions by utilizing flood timescale to classify flood types in seasonally snow covered region, *Journal of Hydrology*, 2019.
- Yang, L., Villarini, G., Smith, J. A., Tian, F., and Hu, H.: Changes in seasonal maximum daily precipitation in China over the period 1961–2006, *International Journal of Climatology*, 33, 1646–1657, 2013.
- 805 Yang, L., Liu, M., Smith, J. A., and Tian, F.: Typhoon Nina and the August 1975 Flood over Central China, *Journal of Hydrometeorology*, 18, 451–472, 2017.
- Yang, T., Zhang, Q., Chen, Y. D., Tao, X., Xu, C.-Y., and Chen, X.: A spatial assessment of hydrologic alteration caused by dam construction in the middle and lower Yellow River, China, *Hydrological Processes*, 22, 3829–3843, 2008.
- Yu, G., Wright, D. B., Zhu, Z., Smith, C., and Holman, K. D.: Process-based flood frequency analysis in an agricultural watershed exhibiting nonstationary flood seasonality, *Hydrology and Earth System Sciences Discussions*, pp. 1–30, 2018.
- 810 Zhang, Q., Wu, L., and Liu, Q.: Tropical cyclone damages in China 1983–2006, *Bulletin of the American Meteorological Society*, 90, 489–495, 2009.
- Zhang, Q., Gu, X., Singh, V. P., Xiao, M., and Xu, C.-Y.: Stationarity of annual flood peaks during 1951–2010 in the Pearl River basin, China, *Journal of Hydrology*, 519, 3263–3274, 2014.
- 815 Zhang, Q., Gu, X., Singh, V. P., Xu, C.-y., Kong, D., and Xiao, M.: Homogenization of precipitation and flow regimes across China : Changing properties , causes and implications, *Journal of Hydrology*, 530, 462–475, 2015.
- Zhang, Q., Gu, X., Singh, V. P., Sun, P., Chen, X., and Kong, D.: Magnitude, frequency and timing of floods in the Tarim River basin, China: changes, causes and implications, *Global and Planetary Change*, 139, 44–55, 2016.
- Zhang, Q., Zheng, Y., Singh, V. P., Luo, M., and Xie, Z.: Summer extreme precipitation in eastern China: mechanisms and impacts, *Journal of Geophysical Research*, 122, 2766–2778, 2017.
- 820 Zhang, Q., Gu, X., Li, J., Shi, P., and Singh, V. P.: The impact of tropical cyclones on extreme precipitation over coastal and Inland Areas of China and its association to ENSO, *Journal of Climate*, 31, 1865–1880, 2018a.
- Zhang, Q., Gu, X., Singh, V. P., Shi, P., and Sun, P.: More frequent flooding? Changes in flood frequency in Pearl River, *Hydrology and Earth System Sciences*, 22, 2637–2653, 2018b.
- 825 Zhang, W., Villarini, G., Vecchi, G. A., and Smith, J. A.: Urbanization exacerbated the rainfall and flooding caused by hurricane Harvey in Houston, *Nature*, 563, 384–388, 2018c.

**Table 1.** Summary of tropical cyclones that produced more than 100 annual flood peaks over China. All the stations that are located within the 500 km buffer zone of each tropical cyclone track are counted. The “storm type” column shows whether the tropical cyclone experienced extratropical transition (ET) or not (TS).

| Rank | Storm name    | Total No. of storm-affected stations | Total No. of annual flood peaks | No. of record floods | Storm type |
|------|---------------|--------------------------------------|---------------------------------|----------------------|------------|
| 1    | Herb (1996)   | 465                                  | 167                             | 4                    | TS         |
| 2    | Wendy (1963)  | 622                                  | 159                             | 6                    | ET         |
| 3    | Tim (1994)    | 591                                  | 156                             | 2                    | ET         |
| 4    | Freda (1984)  | 634                                  | 144                             | 2                    | ET         |
| 5    | Doris (1961)  | 836                                  | 119                             | 2                    | ET         |
| 6    | Winnie (1997) | 482                                  | 114                             | 0                    | ET         |
| 7    | Andy (1982)   | 375                                  | 111                             | 10                   | TS         |
| 8    | Russ (1994)   | 330                                  | 104                             | 1                    | ET         |
| 9    | Nina (1975)   | 441                                  | 102                             | 24                   | TS         |



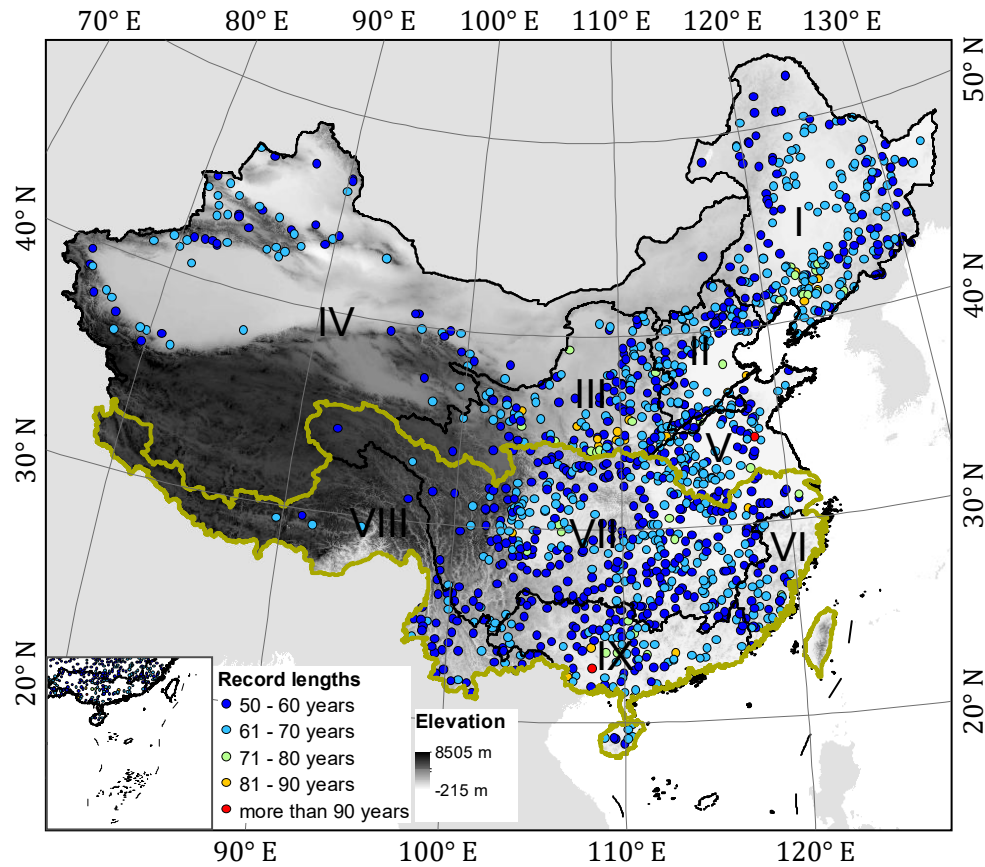

**Figure 1.** Overview of the stream gauging stations (blue dots) with record lengths of more than 50 years over China (1120 gauges in total). Shaded color-Scatter shading represents the record length (in years) for each station. The grey shading represents topography, while the black lines represent the first-level hydrologic units. The Roman numerals highlight the nine major hydrologic units in China: I-Northeastern river basins, II-Haihe River basin, III-Yellow River Basin, IV-Northwestern river basins, V-Huaihe River basin, VI-Southeastern river basins, VII-Yangtze River basin, VIII-Southwestern river basin, and IX-Pearl River basin. Red-Olive line shows the boundary of river basins in southern China (VI-IX), with the rest of the river basins in northern China (I-V).

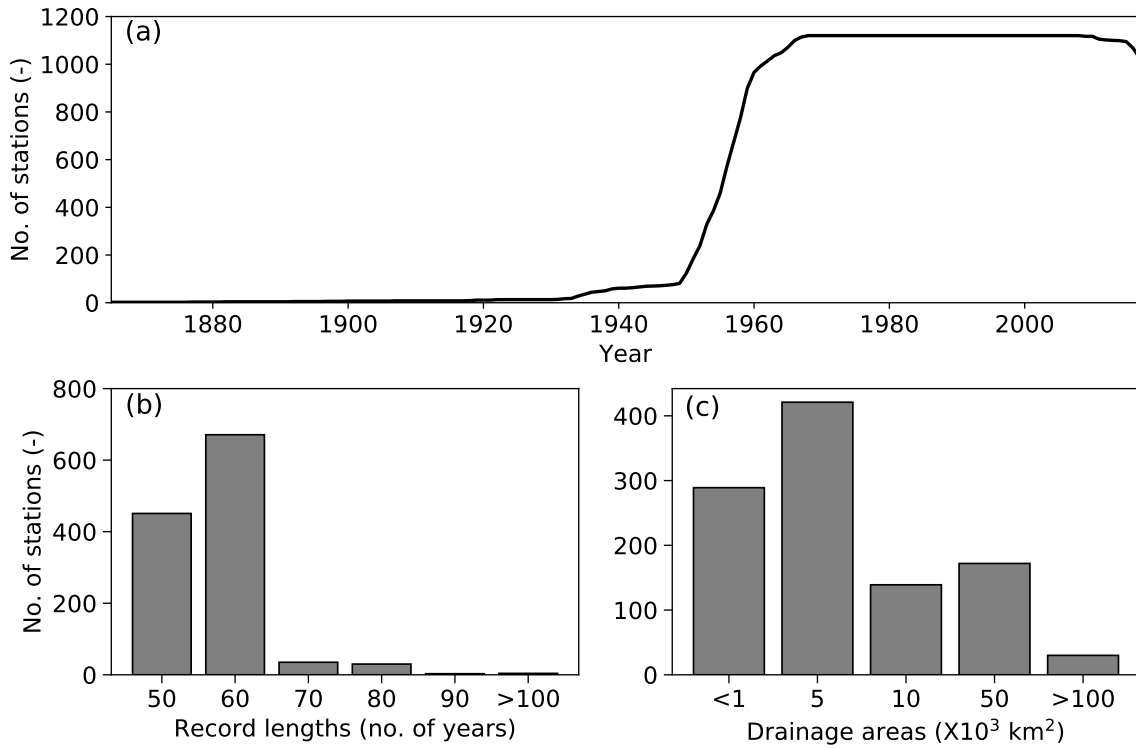

**Figure 2.** (a) Time series of total number of available stations (with record lengths of more than 50 years) for each year. Histograms of all the 1120 stream gauging stations sorted by (ab) record lengths and (bc) drainage areas.

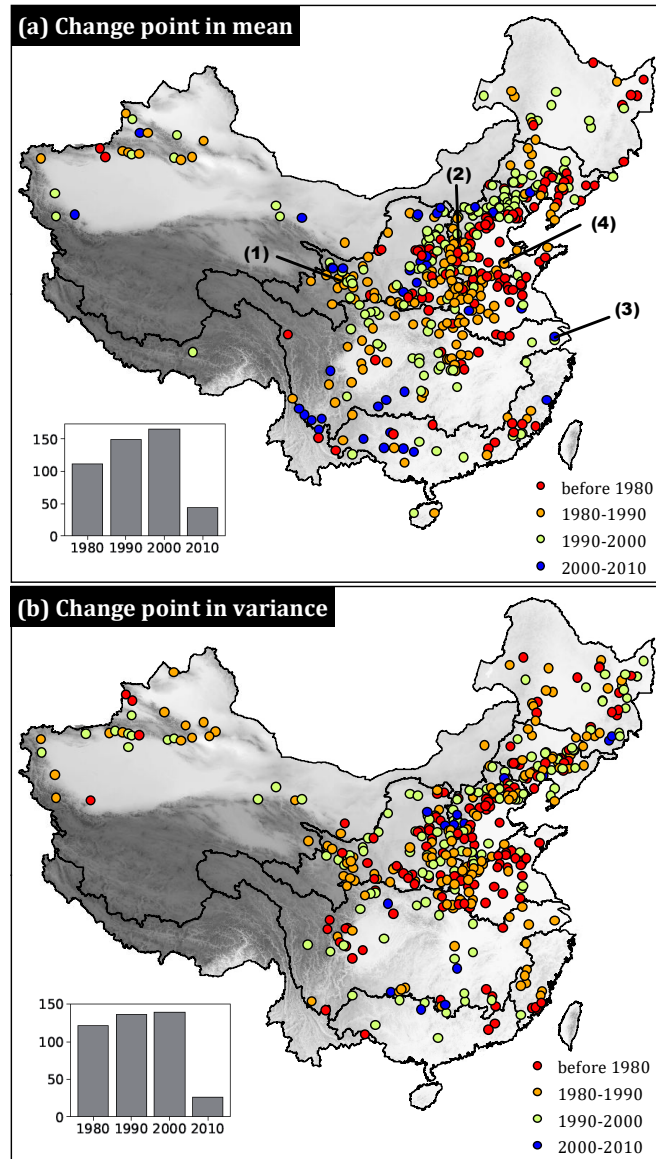

**Figure 3.** Change points in (a) mean and (b) variance. Color represents the year of change-point occurrence. The insert plot shows the histogram of the years of change-point occurrence (y-axis represents the number of change points, while x-axis represents the ending year of a 10-year period, e.g., 1990 actually means 1980-1990). Results are Only stations with results being statistically significant (at the level of 5%) are shown.

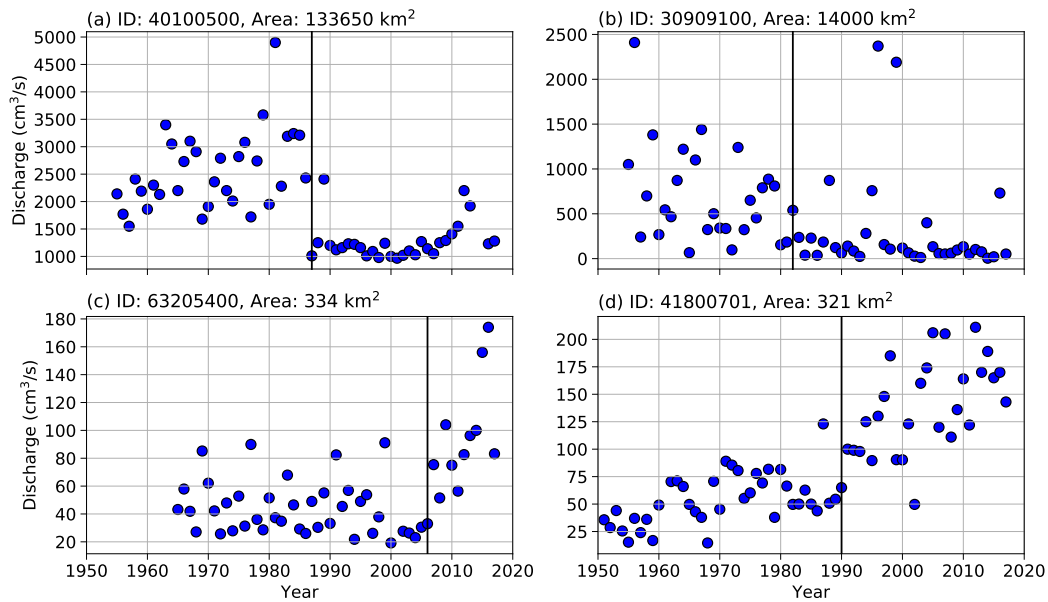

**Figure 4.** Time series of annual flood peaks for four stream gauging stations with strong human interventions: (a) large hydroelectric dams (upper Yellow River, ID: 40100500,  $-36.00^{\circ}\text{N}$ ,  $-101.40^{\circ}\text{E}$ ), (b) a cascade of small reservoirs (upper Haihe River, ID: 30909100,  $-38.39^{\circ}\text{N}$ ,  $-113.71^{\circ}\text{E}$ ), (c) urbanization (a tributary in the lower Yangtze River, ID: 63205400,  $-31.20^{\circ}\text{E}$ ,  $-120.66^{\circ}\text{E}$ ), and (d) ~~water transfer transboundary water-transfer~~ project (a tributary in the lower Yellow River, ID: 41800701). Locations of the four stations are represented by the numbers in brackets in Figure 3,  $36.71^{\circ}\text{N}$ ,  $-117.07^{\circ}\text{E}$  with (1) to (4) corresponding to (a) to (d), respectively. Black lines indicate the year of occurrence for change point in mean. Results are based on the Pettitt's test, ~~and are~~. Only stations with Pettitt's test being statistically significant (at the level of 5%) are shown.

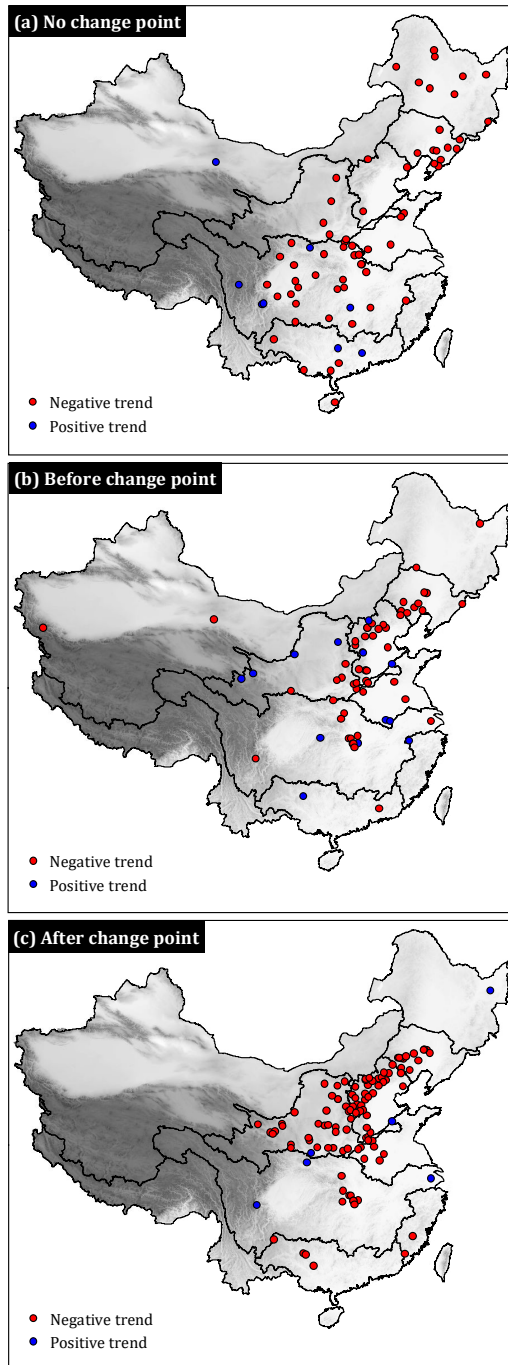

**Figure 5.** Mann-Kendall test results for stations (a) without change point in mean and (b,c) with change point in mean. Results are statistically significant at the level of 5%. Different number of data points between (b) and (c) are associated with (1) insufficient record lengths for sub-groups before or after change points, (2) linear trends for either sub-group being not statistically significant.

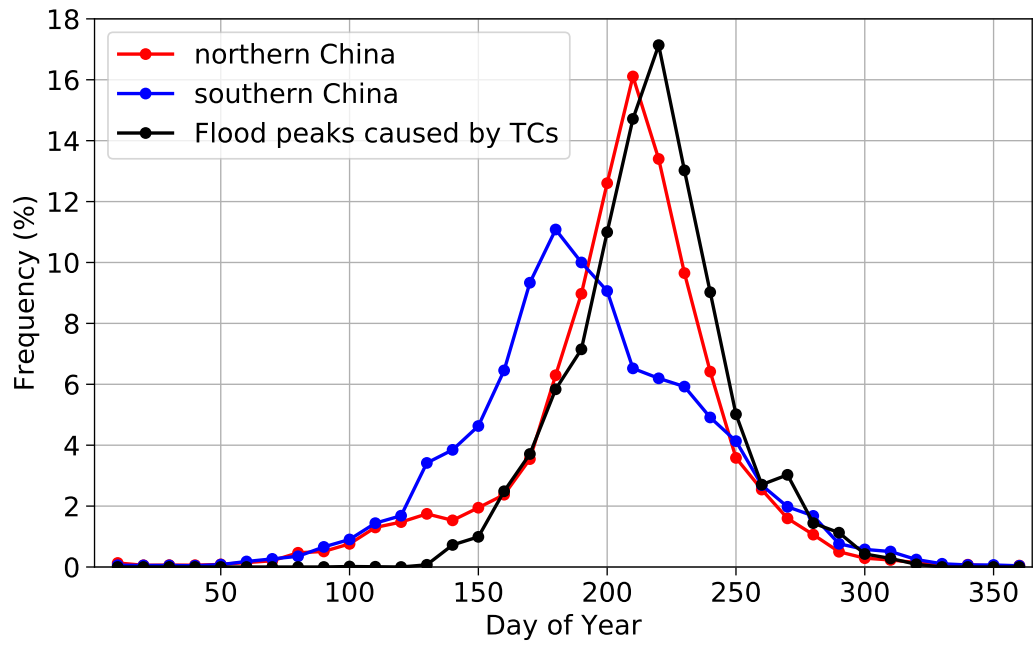

**Figure 6.** Seasonality of annual maximum flood peaks for northern China (red), southern China (blue), and annual flood peaks caused by tropical cyclones (black).

(a) Change point in mean for time-series of annual flood peak timing (represented by day of the year). Color represents the year of change-point occurrence. (b) Mann-Kendall test for stations without change point in mean for the annual flood peak timing. Results are statistically significant at the level of 5%.

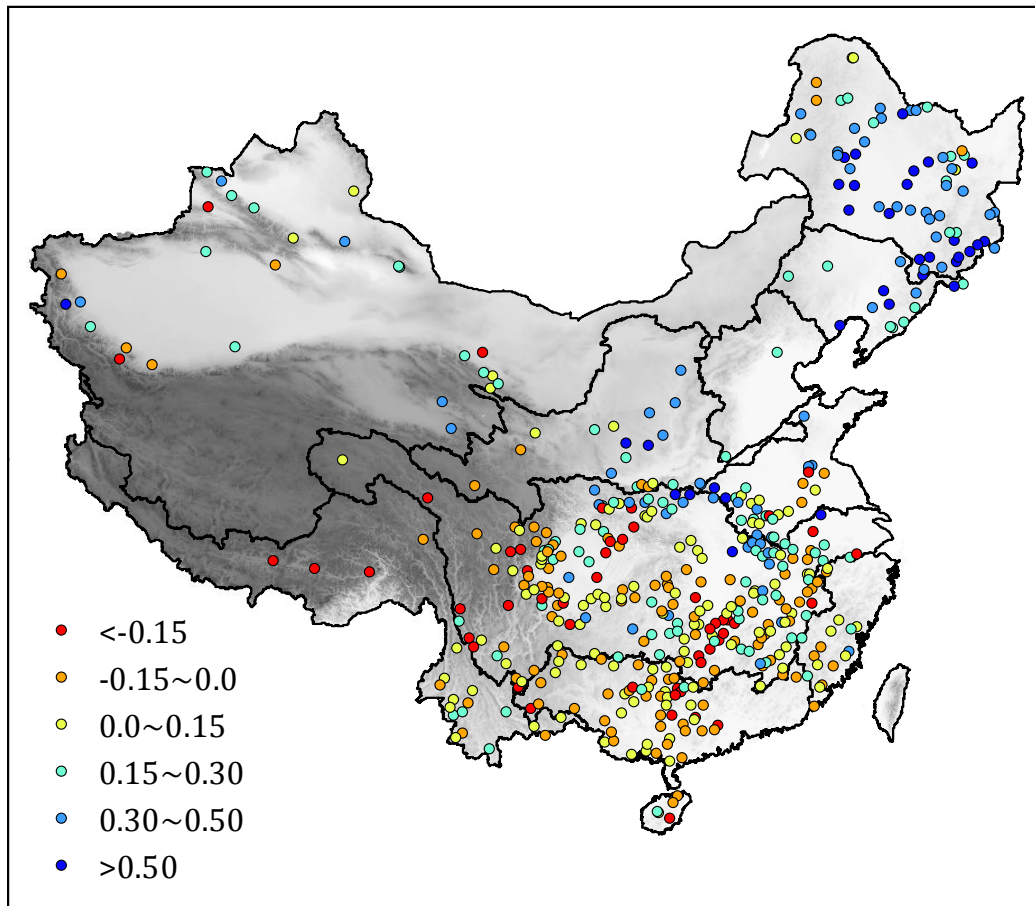

**Figure 7.** Map of the GEV shape parameters for the stationary time series of annual flood peaks.

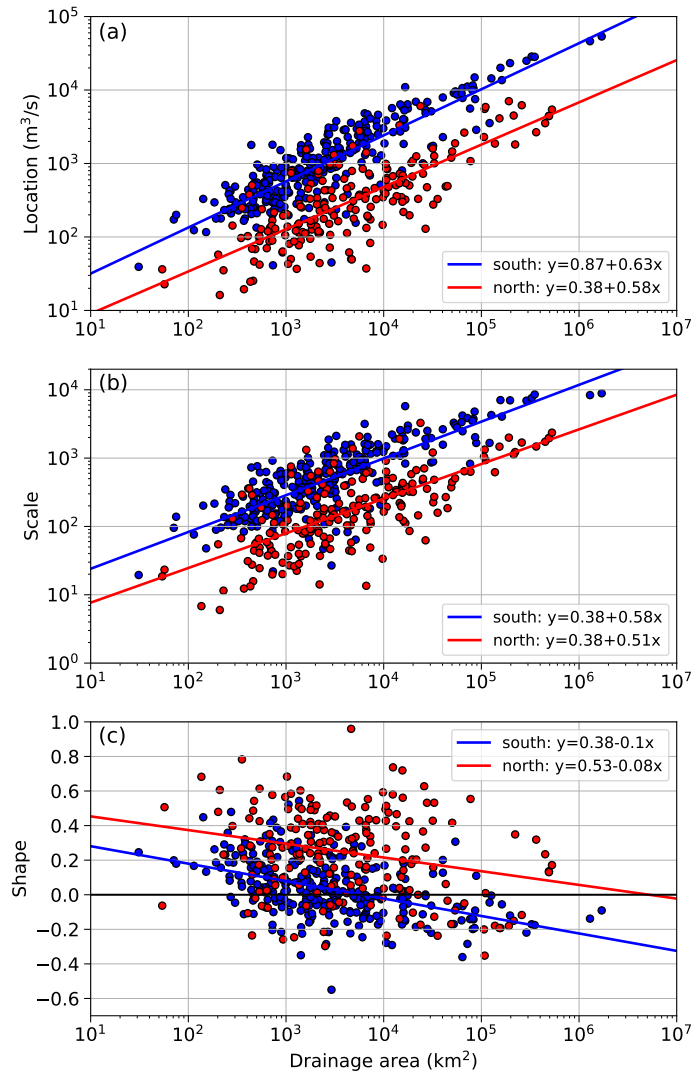

**Figure 8.** Scatterplots of GEV parameters (a) location, (b) scale, and (c) shape, as a function of drainage areas. Blue (red) scatters represent stations over south (north) China.



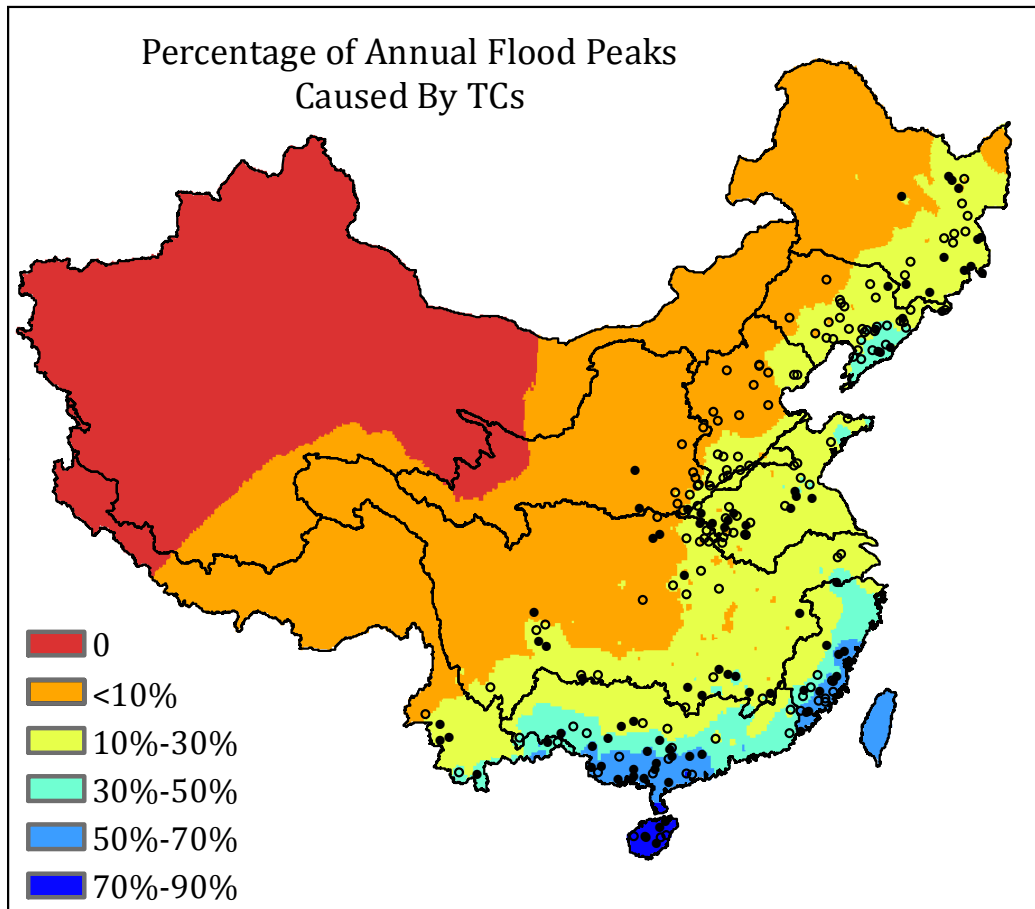

**Figure 9.** Percentage of annual flood peaks that are caused by tropical cyclones. The black dots and circles represent the stations with record floods caused by tropical cyclones. The black dots further highlight stations with stationary time series of annual flood peaks.

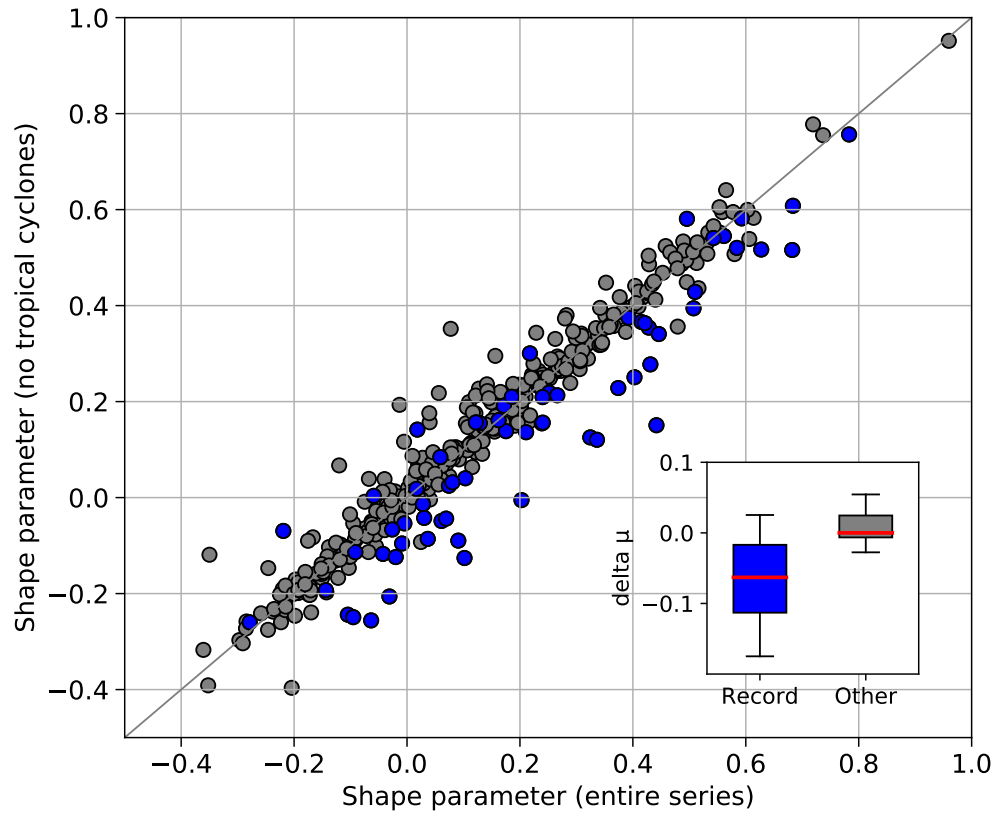

**Figure 10.** Scatterplot of the shape parameters for the entire series versus the series with annual flood peaks caused by tropical cyclones removed. Blue dots highlight the stations with record floods that are caused by tropical cyclones (see Figure 1 for locations). The insert boxplot shows the differences of shape parameter (series with TC flood peaks removed minus the entire series) for stations with (blue) and without (grey) TC-induced record floods.

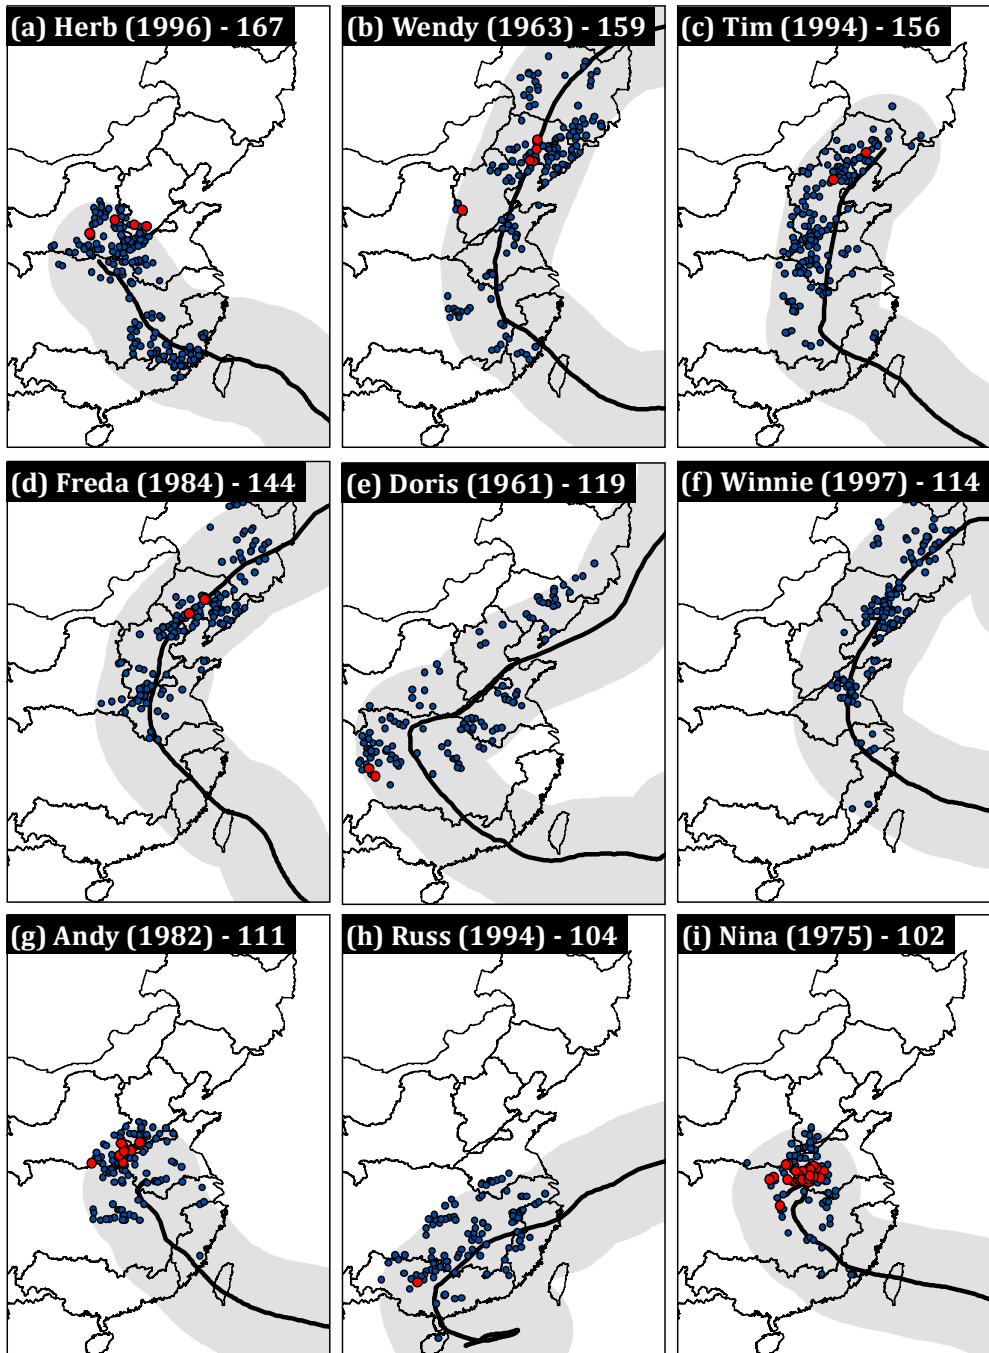

**Figure 11.** Tropical cyclones that produced more than 100 annual flood peaks (blue dots) over China. Red dots highlight that the annual flood peak is also the record flood of the station. Dark black line shows tropical cyclone [track](#). Grey shading represents [500 km buffer zone of each track](#). See Table 1 for more details.

# On the Flood Peak Distributions over China

Long Yang<sup>1</sup>, Lachun Wang<sup>1</sup>, Xiang Li<sup>2,3</sup>, and Jie Gao<sup>4</sup>

<sup>1</sup>School of Geography and Ocean Science, Nanjing University, Nanjing, Jiangsu province, China

<sup>2</sup>China Institute of Water Resources and Hydropower Research, Beijing, China

<sup>3</sup>State Key Laboratory of Plateau Ecology and Agriculture, Qinghai University, Xining province, China

<sup>4</sup>China Renewable Energy Engineering Institute, Beijing, China

**Correspondence:** Long Yang (yanglong@nju.edu.cn)

**Abstract.** Here we for the first time present a nation-wide characterization of flood hazard across China. Our analysis is based on an exceptional dataset of 1120 stream gauging stations with continuous records of annual flood peaks for at least 50 years across the entire country. Our results are organized by centering on various aspects of flood peak distributions, including temporal changes in flood series and their spatial variations, statistical distribution of extreme values, and properties of storms that lead to annual flood peaks. These aspects altogether contribute to improved understandings of flood hydrology under a changing environment over China, and promote the advance of flood science at the global scale. Historical changes in annual flood peaks demonstrate frequent abrupt changes rather than slowly varying trends. The dominance of decreasing annual flood peak magnitudes indicates a weakening tendency of flood hazard over China in recent decades. We model the upper tails of flood peaks based on the Generalized Extreme Value (GEV) distributions. The GEV shape parameter is weakly dependent on drainage area, but shows spatial splits tied to rainfall climatology between northern and southern China. Landfalling tropical cyclone plays an important role in characterizing the upper-tail properties of flood peak distributions especially in northern China and southeastern coast, while the upper tails of flood peaks are dominated by extreme monsoon rainfall in southern China. Severe flood hazards associated with landfalling tropical cyclones are characterized with complex interactions of storm circulation with synoptic environment (i.e., mid-latitude baroclinic disturbances) and regional topography.

## 1 Introduction

We examine flood peak distributions over China based on 1120 stream gauging stations with continuous records of annual maximum flood peaks for at least 50 years. The ultimate goal of our study is to provide improved characterization of flood hazard across China from both statistical and physical perspectives. This involves a comprehensive suite of analyses that investigate temporal nonstationarities in annual flood peaks (i.e., temporal distribution), flood peak distribution based on extreme value theory (i.e., statistical distribution) and critical factors (in terms of both physiography and climate) that determine the upper tails of flood peaks (i.e., spatial distribution).

Hydrological regimes in most river basins over China, like the rest of the world, have experienced strong anthropogenic influences (i.e., river regulations, land use changes). Human-related impacts on flood hydrology are further complicated by detectable changes in external factors that are critical for flood-generation processes, such as temperature and extreme rainfall,

25 even though it remains unsettled whether the changes are due to natural climate variability or human-induced climate change (e.g., Held and Soden, 2006; Marvel and Bonfils, 2013; Trenberth et al., 2015; Schaller et al., 2016; Risser and Wehner, 2017; Eden et al., 2017). The stationarity assumption of flood series has been questioned and debated in scientific community (Milly et al., 2008; Montanari and Koutsoyiannis, 2014; Salas et al., 2018). Extensive studies on the stationarity of annual flood peaks have been carried out in many parts of the world (e.g., Robson et al., 1998; Robson, 2002; Franks and Kuczera, 30 2002; Villarini et al., 2009; Petrow and Merz, 2009; Villarini et al., 2011; Ishak et al., 2013; Tan and Gan, 2014; Mediero et al., 2014; Hodgkins et al., 2019), including some efforts in global-scale investigations of historical changes in flood series (e.g., Arnell and Gosling, 2016; Do et al., 2017, 2019). Due to the limitation of observational datasets, existing knowledge on flood hazard is significantly biased towards Europe and North America, with the characteristics of other worldwide regions (including China) far from being well represented. There are some regional studies across China (e.g., Zhang et al., 2016, 2014, 35 2018b; Liu et al., 2018). A nation-wide investigation on the stationarity in flood series over China, however, is still missing. The exceptional dataset of annual flood peaks, as demonstrated in present study, will provide additional evidence for detectable changes in flood hydrology under a changing environment. Better understanding of historical changes in annual flood peaks is of paramount importance for constraining model-based projections of flood hazards (e.g., Milly et al., 2002; Hirabayashi et al., 2013; Dankers et al., 2014; Arnell and Gosling, 2016). In this study, we expect to explore the dominant mode (i.e., abrupt 40 changes or slowly varying trends) of nonstationarities in flood series, and highlight potential factors that induce the changes in annual flood peaks.

Improved understanding of flood hazard requires essential knowledge of flood-generation mechanisms. This is also a critical aspect to consider for improved flood frequency analysis (Hirschboeck, 1988; Singh et al., 2005; Leonard et al., 2014; Brooks and Day, 2015; Yan et al., 2017, 2019). Smith et al. (2018) shows that the most extreme flood peaks are frequently determined 45 by extreme events resulted from anomalous flood agents for particular regions of the United States (which is the notion of "strange floods"). Mixture of flood-generation mechanisms poses great challenges for characterizing the upper tails of flood peaks, as different flood agents might lead to flood regimes with distinct statistics (e.g., magnitude, timing, frequency). This is, however, often the case for many regions in the world (e.g., Jarrett and Costa, 1988; Smith et al., 2011; Villarini, 2016; Blöschl et al., 2017; Smith et al., 2018; England et al., 2018). We expect annual flood peaks over China characterized with a mixture of 50 flood-generation mechanisms, due to its geographic location in a monsoon-climate region and on the margin of the most active ocean in tropical cyclones. China suffers the most frequent landfalling tropical cyclones in the world, with 9 tropical cyclones making landfall on average per year (Jiang and Jiang, 2014). Despite its significance, little is known about the hydroclimatology of flooding associated with landfalling tropical cyclones. Even less effort has been spent on investigating the impacts of different flood-generation mechanisms on the upper-tail properties of flood peaks across China. This is a critical issue for China that 55 shows contrasting rainfall climatology (under combined influences from monsoon and landfalling tropical cyclones) between the northern and southern part of the country (i.e., traditionally take the Yangtze River as the geographic divide) (e.g., Yang et al., 2013; Gu et al., 2017a; Zhang et al., 2018a). Extreme floods for different regions are often associated with contrasting flood agents. This is not merely associated with the nature of flood agents themselves, but is also determined by complex interplay of storms with ambient synoptic and physiographic environment. For instance, extreme rainfall from landfalling

60 tropical cyclones can be amplified through interactions of storm circulation with mid-latitude baroclinic disturbances (e.g.,  
Hart and Evans, 2000) and regional topography (e.g., Houze, 2012). Propagation of monsoon also plays a role in determining  
the spatial contrasts of flood agents through regulating temporal occurrences of flood peaks over different regions (e.g., Ding  
and Zhang, 2009). Knowledge in the mixed flood-generation mechanisms and their spatial variations can provide valuable  
insights into improved procedures for the estimates of Probable Maximum Precipitation (PMP) / Probable Maximum Flood  
65 (PMF) in designing flood-control infrastructures (e.g., Smith and Baeck, 2015; Yang et al., 2017).

An important way of characterizing flood hazards is through examining flood peak distributions and factors that determine  
the upper-tail properties. In this study, we model annual flood peaks based on the statistical framework of the generalized  
extreme value (GEV) distributions (similarly see e.g., Katz et al., 2002; Morrison and Smith, 2002; Villarini and Smith, 2010;  
Barros et al., 2014; Bates et al., 2015; Gaume, 2018; Smith et al., 2018). The key focus is placed on the upper tails of flood  
70 peaks across China. Previous studies show strong dependence of location and scale parameters for the GEV distributions on  
drainage area, while the GEV shape parameters only weakly depend on drainage area (Morrison and Smith, 2002; Villarini  
and Smith, 2010). Weak dependence of the GEV shape parameters on drainage area indicate scale-independent properties of  
the upper tails of flood peaks, and highlight additional factors (e.g., spatio-temporal rainfall variability) in determining the  
upper tails of flood peaks. Yang et al. (2013) identified a spatial contrast of extreme rainfall distributions between northern and  
75 southern China and pointed to contrasting flood hydroclimatology across the country. We therefore propose that similar spatial  
contrasts also exist in flood peak distributions across China.

Our study is also motivated by Typhoon Nina and the resultant August 1975 flood in central China. The August 1975 flood  
in central China, with 26000 direct fatalities, is one of the most destructive floods in the world history (Yang et al., 2017). The  
unit peak discharge is  $17 \text{ m}^3 \text{ s}^{-1} \text{ km}^{-2}$  (i.e., flood peak discharge divided by drainage area) for a  $760 \text{ km}^2$  drainage basin, and  
80 is on the list of the world maximum floods. The August 1975 flood plays a key role in shaping the envelop curve of floods in  
China and different versions of the world envelop curve (Yang et al., 2017; Costa, 1987). Devastating consequences of Typhoon  
Nina and the August 1975 flood partially resulted from cascading collapses of dozens of dams, and expose inadequacies of  
conventional approaches for flood frequency analysis (e.g., fitting historical flood records with assumed distribution functions)  
(e.g., Smith and Baeck, 2015; Yang et al., 2017). This is an urgent issue for China, as statistics show socio-economic damages  
85 caused by tropical cyclones are rapidly increasing in recent decades, with a large portion of the damages resulted from riverine  
flooding (Zhang et al., 2009; Rappaport, 2014).

Based on the aforementioned gap of our knowledge in flood hydrology, we examine flood peak distributions across China  
by centering on the following questions: (1) What is the dominant mode of the violation of stationarity in annual flood peak  
series? (2) How do dominant flood-generation mechanisms vary across China? (3) How do upper-tail properties of flood peak  
90 distributions depend on drainage areas (i.e., scale-dependence) and rainfall climatology? (4) What is the impact of landfalling  
tropical cyclones on the upper tails of flood peaks across China? (5) What are the characteristics of the most severe flood hazards  
(i.e., as represented by the number of stations with annual flood peaks) in the history of China and the tropical cyclones that  
induce them? Even though these questions are examined based on an exclusive dataset over China, timely answers to these

questions will undoubtedly contribute to the compliment of our limited understandings on flood hazard under a changing  
95 environment, and promote the advance of flood science at the global scale.

## 2 Data

Our analysis is based on observations of annual maximum instantaneous peak discharge from 1120 stream gauging stations with continuous records of at least 50 years (i.e., no missing data consecutively throughout the entire periods). There are relatively more stations distributed in eastern China than the western part of the country (Figure 1). The dataset is comprehensively  
100 collected from local hydrographic offices of nine major river basins across China. All these stations are nation-level control stations with the records that have been through strict quality control procedures to ensure data consistency and accuracy. For instance, the dates of annual maximum flood peak and highest stage should be comparable, with records of missing flood peak timing discarded to ensure data accuracy. Stations with notable site re-locations (i.e., that lead to changes in drainage area) during the observational periods are not included in this dataset. The flood records demonstrate a variety of ways in  
105 data collection, mainly include intermittent direct measurements of discharge during flood season, indirect inferences through stage-discharge rating curves, and post-flood field surveys.

Time series of total number of available stations are shown in Figure 2a. The longest flood record is 153 years, with approximately more than 90% stations fully available during the period from 1960 to 2017. The record length of 66% stations exceeds 60 years starting from 1950s till the year of 2017 (Figure 2b). There are considerable variabilities in the spatial scales of represented river basins, with a large percentage (approximately 64%) of stations representing small and medium river basins (with drainage areas less than 5000 km<sup>2</sup>, Figure 2c). Previous studies found contrasting climate regimes and extreme rainfall distributions between northern and southern China (e.g., Yang et al., 2013; Ma et al., 2015). To facilitate analyses and comparisons, we further classify the 1120 stations into two sub-groups, i.e., northern and southern China, based on their geographic locations (Figure 1). The northern group includes stations mainly in northeastern river basins, the Yellow River basin, the Huaihe River  
115 basin, and the Haihe River basin, while the southern group includes southeastern river basins, southwestern river basins, the Yangtze River basin, and the Pearl River basin.

## 3 Methodology

### 3.1 Change point and trend analysis

We use the non-parametric Pettitt's test (Pettitt, 1979) to examine the presence of abrupt changes in annual flood peak series.  
120 Pettitt's test is a rank-based test that relies on the Mann-Whitney statistic to test whether two samples come from the same population. There are no assumed distributions for the test, which makes it less sensitive to outliers and skewed distributions. It allows for the detection of a single change point in mean at an unknown point in time, with the test significance computed using the given formulation. We further apply the Pettitt's test on the squared residuals derived with respect to the local polynomial regression line (loess function, Cleveland, 1979) to detect change point in variance in annual flood peak series (similarly see,

125 e.g., Villarini et al., 2009; Villarini and Smith, 2010; Yang et al., 2013). We also adopted a different change-point detection approach, i.e., the one proposed by Matteson and James (2014), but only found negligible deviations from the results based on Pettitt's test (results not shown).

Monotonic trends can be induced by existence of abrupt change points in mean rather than indicating slowly varying trend for the flood series. For those series that do not show significant abrupt change points in mean, we directly use the non-parametric  
130 Mann-Kendall test (Mann, 1945; Kendall, 1975) to examine the presence of monotonically increasing or decreasing trends in annual flood peak series. For the series with change point in mean, we divide it into two sub-groups and test monotonic trends for each of the two sub-groups (i.e., before and after the change point). Additional trend analysis for the sub-series can highlight stations that show both abrupt changes and slowly varying trend in the entire flood series. We assume the existence of only a single change point in mean for each flood peak series in this study, to avoid dividing the series into too many segments  
135 (similarly see, e.g., Villarini et al., 2009, 2012). Only sub-series with record lengths exceeding 10 years are considered in the trend analysis. We set a significance level of 5% (i.e., two-tailed) for both the change-point and trend tests.

### 3.2 Generalized Extreme Value distribution

The Generalized Extreme Value (GEV) distribution is used to statistically model distributions of annual maximum flood peaks (e.g., Coles, 2001; Villarini and Smith, 2010). The GEV, based on extreme value theory, has been widely used in flood frequency  
140 analysis (e.g., Coles, 2001; Katz et al., 2002; Morrison and Smith, 2002; Villarini and Smith, 2010). The cumulative distribution function of the GEV takes the form:

$$F(x|\mu, \sigma, \xi) = \exp \left\{ - \left[ 1 + \xi \left( \frac{x - \mu}{\sigma} \right) \right]^{-1/\xi} \right\} \quad (1)$$

where  $\mu$ ,  $\sigma$ , and  $\xi$  represents the location, scale, and shape parameter, respectively. The location ( $\mu$ ) and scale ( $\sigma$ ) parameter is related to the magnitude and variability of the records, respectively. The shape parameter ( $\xi$ ) indicates the tail properties of the distribution, with positive (negative) values pointing to heavy and unbounded (light and bounded) upper tail of flood peak  
145 distribution. The GEV parameters are estimated based on the maximum likelihood estimators (e.g., Coles, 2001). We fit the GEV distributions only for stations without statistically significant change points in mean and variance and monotonic trends, following the basic assumption of probability theory that data samples should be independent and identically distributed. The three fitted GEV parameters (i.e., location, scale and shape) will be further used to examine their correlations with drainage areas, shedding light on the scale-dependence of the upper-tail properties of flood peak distributions across China.

### 150 3.3 Association of flood peaks with tropical cyclones

We associate an annual flood peak of a given stream gauging station with a particular tropical cyclone by following the procedures, i.e., if the center of a tropical cyclone is within 500 km of the gauging station during a time window of two weeks centered on the occurrence time of the flood peak. The spatial and temporal thresholds reflect the mean spatial extent of tropical cyclone rainfall (e.g., Rios Gaona et al., 2018), and the upper limit of flood response time (similarly also see, e.g., Hart and  
155 Evans, 2000; Villarini and Smith, 2010; Smith et al., 2011; Villarini et al., 2014). We obtain the information of tropical cyclones



from the International Best Track Archive for Climate Stewardship (IBTrACS, see <https://www.ncdc.noaa.gov/ibtracs/> for details). The dataset provides records of the circulation center location (latitude and longitude) and storm intensity (represented by minimum sea level pressure) at a temporal interval of 6 hours. An additional attribute provided by IBTrACS for each tropical cyclone at each time interval is the nature of the storm, i.e., extratropical transition or tropical storm. Extratropical transition (ET) characterizes the changing properties of a tropical cyclone from a warm-core, symmetric structure to a cold-core, asymmetrical structure (e.g. Hart and Evans, 2000). Physical process associated with extratropical transition plays an important role in determining the spatial distribution of tropical cyclone rainfall (e.g. Atallah and Bosart, 2003; Atallah et al., 2007; Liu and Smith, 2016). Tropical storm (TS), as a contrast, indicates the maintenance of a warm-core, symmetric structure during the entire life cycle of the storm.

## 165 4 Results and discussion

The structure of this section is organized as follows. We first detect change points and monotonic trends to shed light on the long-term changes in flood series across China, and discuss possible drivers that induce them (subsection 4.1). We move on to subsection 4.2 to examine seasonal distribution of annual flood peaks, highlighting the mixture of flood-generation mechanisms across China and its spatial variation. Results from both subsection 4.1 and 4.2 will serve the basis for the analysis of subsection 4.3 that delves into the upper-tail properties of flood peak distributions across China, focusing on the spatial distributions of the GEV parameters as well as their dependence on drainage areas and rainfall climatology. Subsection 4.4 will specifically examine the impacts of tropical cyclones on extreme floods, to shed light on the statistical and physical characteristics of most extreme floods in the history of China.

### 4.1 Stationarity

#### 175 4.1.1 Abrupt changes

Figure 3 shows the results of change-point analyses for annual flood peaks based on the Pettitt's test. There are 436 (38%) and 398 (35%) stations with significant change points in mean and in variance, respectively. 27% stations show change points both in mean and in variance. The majority of stations tend to show smaller values in mean (383 stations) and variance (305 stations) after than before the change point (figure not shown). Change points in both mean and variance show striking spatial concentration in northern China (i.e., the lower Yellow River basin, the upper Huaihe River basin, and the entire Haihe River basin). Change points in both mean and in variance are frequently observed during the period 1980-2000, with slightly larger frequency of occurrence during the period 1990-2000. We observe an additional amount of change points in mean distributed in the downstream of southwestern river basins and in the upper and middle portion of the Yangtze River and Pearl River basins (Figure 3a). These change points tend to occur in the period 2000-2010 instead of the period of dominant change-point occurrence in northern China.

Spatial and temporal clustering of change points demonstrate evidence of anthropogenic influences on flood hydrology (e.g., Vogel et al., 2011; Hodgkins et al., 2019). Through meta-data inspection of selected stations, we are able to relate some of the abrupt changes in annual flood peaks to intentional human activities. For instance, the change point in mean at the year of 1986 in the upper Yellow River, the Guide hydrological station, is due to the construction of a large hydropower-generation dam, the Longyangxia Dam (Figure 4a). The Longyangxia Dam is a multi-purpose dam (e.g., flood control, water supply), and controls runoff variability of the entire Yellow River basin (Si et al., 2019). The Guide station is approximately 30 km downstream of the Longyangxia Dam. There are a couple of other hydrological stations distributed further downstream (e.g., Xunhua hydrological station, 120 km downstream), and show change points in mean around the year of 1986 for the annual flood peak series. Anthropogenic regulations on rivers in northern China (especially the middle/lower portion of the Yellow River basin and the upper Haihe River basin) is often characterized with a cascade construction of small reservoirs. We show a flood peak series in the upper Haihe River basin that experienced significant decrease in annual maximum flood peak magnitudes (smaller values both in mean and variance after the change point) around early 1990s, associated with extensive construction of small reservoirs due to an increased demand for irrigation and domestic water supply (Figure 4b). The impact of regulation by dams or reservoirs on flood hydrology has been discussed and debated in previous studies (e.g., Yang et al., 2008; Barros et al., 2014; Zhang et al., 2015; Ayalew et al., 2017; Lu et al., 2018). For instance, Smith et al. (2010) found limited impacts of dams on flood hydrology in the Delaware River basin, which is not the case for the upper Yellow River basin in our study. This might be related to contrasting physiographic properties of the river basins and/or functions of the dams, and needs further analysis.

Changes in land use/land cover (e.g., urbanization, deforestation/afforestation) can also contribute to change points in the series of annual flood peaks. This is especially the case for stations in the lower Haihe River basin (where the Beijing-Tianjin-Hebei metropolitan region is distributed) and Yangtze River delta region (where Shanghai and other major cities are located). Figure 4c shows a small urban watershed in the lower Yangtze River basin) that experienced rapid urbanization in recent decades. Transboundary water-transfer project demonstrates another form of anthropogenic influence on flood hydrology. Abrupt increases in flood peak magnitudes are mainly tied to the elevated base flows transferred from neighboring river basins. We provide the annual flood peak series for a station in the lower Yellow River basin (Figure 4d). Increasing water demand from domestic and agricultural sectors in the lower Yellow River basin lead to extensive implementation of water-transfer projects.

Abrupt changes in the series of annual flood peaks can also originate from the changes in extreme rainfall across China. However, one of our previous studies investigated changes in annual maximum daily rainfall over China, but found no clear signature of spatial clustering for change points in either mean or variance for the rainfall series, although abrupt changes in annual maximum daily rainfall frequently occurred in the 1990s (see Figure 2 in Yang et al., 2013). Inconsistent spatial patterns of change points in annual maximum flood peak and annual maximum daily rainfall series indicate a weak role of climate shifts in producing abrupt changes in annual flood peaks.

### 4.1.2 Monotonic trends

We further examine the monotonic trends of annual flood peak series based on the Mann-Kendall test for those stations that do not show significant change points in mean. There are only 69 stations (accounting for approximately 6% of the total stations) with significant linear trends (Figure 5a). For those stations with significant linear trends, 62 (7) of them exhibits decreasing (increasing) trends. The 62 stations are uniformly distributed across the entire country, indicating a weakening tendency of annual maximum flood peaks over China in recent decades. Abrupt change rather than slowly varying trend is a common mode of violation of the stationarity assumption for the annual flood peak series over China. For those stations with significant change points in mean, we test the linear trends for each sub-series of flood peaks before and after the change point. Almost all stations show decreasing trends for the sub-series either before or after the change point with only a few exceptions (Figure 5b and 5c). Similar with change points in mean and in variance, stations with significant decreasing trends after change points spatially concentrate in northern China, especially the middle and lower portion of the Yellow River basin and the upper Haihe River basin. The decreasing trend in the middle and lower portion of the Yellow River is most likely due to the implementation of soil conservation practices in its tributary regions (e.g., Bai et al., 2016). There are few stations in southern China that show significant linear trends either before or after change points.

Changes in annual rainfall extremes (i.e., annual maximum daily rainfall) show a “dipole-like” spatial structure over China, with decreasing trends in northern China and increasing trends in the south (e.g., Yang et al., 2013; Ma et al., 2015; Gu et al., 2017b). The decreasing annual maximum flood peaks in northern China may be partially attributed to the weakening rainfall intensity in recent decades. The opposite trends in annual rainfall extremes and annual maximum flood peaks in southern China seem contradictory to our perception. Contrasting trends between intense rainfall and annual high flows are also found over United States (mainly eastern of the Mississippi River), which are attributed to inconsistent changes of intense rainfall in different seasons (Small et al., 2006), i.e., changes in fall precipitation mainly contributes to the trend in annual rainfall extremes, while annual high flows are often observed in spring with no significant changes in rainfall. This is, however, not the case for southern China. Changes in rainfall extremes among all four seasons are dominated by significant or relatively weak increasing trends over southern China (Gu et al., 2017b). Disconnections between changes in annual maximum rainfall and annual flood peaks are also identified in other previous studies (e.g., Ivancic and Shaw, 2015; Berghuijs et al., 2016; Wasko and Nathan, 2019), and point to the additional roles of antecedent watershed wetness and changes in space-time rainfall properties in dominating flood-generation processes (i.e., storm extent, Sharma et al., 2018). Disconnection of changes in rainfall extremes and floods as exhibited for the gauges across southern China highlight the complex drivers for flood-generation process, and merits further investigation.

### 4.2 Mixture of flood-generation mechanisms

Long-term changes in annual flood peak series highlight the need for better understanding on flood-generation mechanisms across China, which can be pursued through the examination of seasonal distribution of annual flood peaks. There are three (two) distinct peaks in the seasonal distribution of annual flood peaks for southern (northern) China (Figure 6). The first peak

for both southern and northern China occur around late April, but are resulted from different flood-generation mechanisms. Frequent occurrences of annual flood peaks around late April in southern China are observed mainly in the southeastern coast, and are caused by frontal systems or associated with early onset of the East Asia Summer Monsoon (e.g., Ding and Chan, 2005; Ding and Zhang, 2009). The April peak of flood frequency in northern China is contributed by localized storm events  
255 associated with mid-latitude weather systems in the northwestern part of the country, or related to snow melt in high-altitude regions (Ding and Zhang, 2009). The East Asia Summer Monsoon onsets around early May over mainland China, and moves stepwise northward/northeastward driven by the West Pacific Subtropical High (e.g., Ding and Chan, 2005; Zhang et al., 2017). The monsoon system is characterized with “two abrupt northward jumps and three stationary periods”, and plays a deterministic role in the seasonal distribution of flood peaks in both northern and southern China. Frequent flood peaks around  
260 late June in the middle and lower portion of the Yangtze River basin contribute to the second peak of seasonal distribution of flood frequency in southern China. Further northward propagation of the monsoon system leads to frequent annual flood peaks in northern China around late July and early August. The summer monsoon retreats back to the south and is weakened afterwards, transferring the dominance in flood-generation systems to tropical cyclones and post-monsoon synoptic systems.

Annual flood peaks that are caused by tropical cyclones show a very sharp seasonal distribution, with 70% of them observed  
265 in August alone (Figure 6, see section 3 for the association of annual flood peaks with a tropical cyclone). Strong pressure gradients along the western flank of the West Pacific Subtropical High provide favorable synoptic conditions for large-scale moisture transport and northwestward propagation of tropical cyclones. Interactions of tropical cyclones with mid-latitude systems (e.g., mid-latitude upper-level trough) and regional topography (i.e., Qinling and Taihang Mountains) can further enhance extreme rainfall associated with landfalling tropical cyclones and the resultant flooding over China (mainly the eastern  
270 part of the country, e.g., Svensson and Berndtsson, 1996; Yang et al., 2017; Gu et al., 2017a). The seasonal distribution of annual flood peaks in northern China is almost overlapped with that of flood peaks caused by tropical cyclones, while tropical cyclones mainly contribute to the third peak of the seasonal distribution for annual flood peaks in southern China (Figure 6). The concurrency of monsoon-controlled storm events and tropical cyclones is a key element of flood hydroclimatology across China. Analysis on the seasonal distribution of annual flood peaks highlight contrasting rainfall climatology between northern  
275 and southern China as well as mixture of flood-generation mechanisms across the entire country.

### 4.3 Extreme Value Distribution

We model distributions of annual flood peaks using the GEV distribution. We only focus on the stations without significant change points in mean or in variance, and without significant monotonic trends (i.e., the stationary stations). There are 486 stations that satisfy these requirements. These stations are densely located in southern rather than northern China (Figure 7),  
280 mostly due to the spatial clustering of stations with abrupt change points in annual flood peaks in northern China (Figure 3). The stationary stations represent a wide range of spatial scales of drainage basins for both northern and southern China. Figure 8 shows the dependence of GEV parameters on drainage area for the 486 stationary stations. Location and scale parameters are positively correlated with drainage area in a log-log domain. The correlations are all significant at the level of 5%. The shape parameter, however, generally decreases with drainage area but shows only weak dependence in a log-log domain (with a

285 correlation coefficient of -0.15 for northern China and -0.16 for the south, neither being statistically significant). The upper-tail properties (as represented by the shape parameter) of flood peak distributions are weakly determined by drainage areas, while the magnitude and variability of annual flood peaks can be well explained by drainage area. Our results are consistent with the study in the eastern United States by Villarini and Smith (2010), and contribute to generalized understanding on the upper-tail properties of flood peak distributions.

290 An interesting finding is that there are striking spatial splits in terms of the dependence of the GEV parameters on drainage areas between northern and southern China (Figure 8). The location and scale parameters for stations in southern China are consistently larger than their counterparts in the north (with a few exceptions, Figure 8a and 8b). The shape parameters in northern China are comparatively larger than that in southern China. Large shape parameters indicate heavier upper tails of flood peak distributions in northern than southern China, even though the magnitudes and variability of flood peaks are relatively smaller in the north. One of our previous studies on the distribution of annual maximum daily rainfall found similar spatial splits for the dependence of GEV parameters on elevation between northern and southern China (Yang et al., 2013; Gu et al., 2017a). Spatial splits in extreme rainfall distributions highlight spatial heterogeneity in flood hydroclimatology across China (which is also represented by the contrasting seasonal distributions of annual flood peaks shown in section 4.2). Spatial contrasts of extreme rainfall distribution further lead to different relationships between three GEV parameters and drainage areas for flood peak distributions between northern and southern China.

We further show the spatial splits for the shape parameter in Figure 7. The majority of the northern stations show positive shape parameters, while the southern stations are mixed with both negative and positive shape parameters. Spatial contrast in rainfall climatology between northern and southern China seems to be a more effective predictor in explaining the spatial variability of shape parameter rather than drainage area. Our results highlight the importance of hydrometeorological analyses for better characterizations of the physical processes that lead to most extreme floods (similarly see e.g., Smith and Baeck, 2015; Yang et al., 2017). Positive shape parameters in northern China indicate flood peak distributions with unbounded upper tails, while negative shape parameters for most southern stations are characterized with a bounded upper tail of flood peak distribution. Understandings remain poor pertaining to the nature of the upper tail of flood peaks (see detailed discussion in e.g., Smith et al., 2018). The bounded upper tail of flood peaks in the south can be associated with physical constraints over drainage basins (for instance, large dams for flood-control purposes) and/or the upper bounds to the hydrometeorological processes (e.g., Enzel et al., 1993; O'Connor et al., 2002; Serinaldi and Kilsby, 2014).

#### 4.4 Tropical cyclones and upper tails of flood peaks

We examine the impacts of tropical cyclones on the upper-tail properties of flood peak distributions across China in this subsection. As mentioned in previous sections, some of the most extreme floods in the history of China are associated with landfalling tropical cyclones in the western North Pacific basin (e.g., Typhoon Nina). Better characterizations of tropical cyclones and flood hazards associated with them can provide physical insights into the upper-tail properties of flood peak distributions.

Tropical cyclones contribute to approximately 18% of annual flood peaks over China. Figure 9 shows the map of the percentage of annual flood peaks that are caused by tropical cyclones to total annual flood peaks for each station. More than 50%

of the annual flood peaks are caused by tropical cyclones in the southeastern coast of China, with the percentage even attaining  
320 90% over the Hainan Island. The percentage gradually decreases when we move further inland and to higher latitudes. Less  
than 10% annual flood peaks can be associated with landfalling tropical cyclones in the middle portion of the Yellow River  
and Yangtze River basins (Figure 9). The percentage of annual flood peaks caused by tropical cyclones is closely tied to the  
spatial distribution of tropical cyclone rainfall and frequency of tropical cyclone occurrence over China (Wu et al., 2005; Ren  
et al., 2010; Gu et al., 2017b). More than 30% of the extreme rainfall events are induced by tropical cyclones along the coastal  
325 regions (Gu et al., 2017a, b), with the percentage gradually decreased moving inland due to rapid weakening of storm intensity  
(e.g., surface roughness, insufficient moisture transport).

We show the stations with record floods (i.e., the largest flood peak for the entire record of a station) that are caused by  
tropical cyclones in Figure 9 to highlight the impacts of tropical cyclones on the most extreme floods. Stations with record  
floods caused by tropical cyclones are spatially clustered in the southeastern coast, central and northeastern China (Figure 9).  
330 Tropical cyclone-induced record floods in the southeastern coast are mainly associated with abundant moisture and energy  
supply for extreme rainfall right after tropical cyclones making landfall. However, the spatial clustering of record floods by  
tropical cyclones in northern China (more specifically, the upper Huaihe River and northeastern China) can be partially related  
to extratropical transition processes during the life cycle of the storm and/or interactions with regional topography, as will be  
elaborated below. We do not observe a comparable distribution of record floods caused by tropical cyclones in southern China  
335 (e.g., the Yangtze River basin) excluding the coastal regions, even though the percentage of annual flood peaks caused by  
tropical cyclone is comparable to that in northern China (less than 30%, Figure 9). Our results highlight the impacts of tropical  
cyclones on flood peak distributions in northern China with a large percentage of record floods caused by relatively infrequent  
visits of landfalling tropical cyclones.

The impact of tropical cyclones on the upper tail properties of flood peak distributions is further examined through the  
340 shape parameter of the GEV distribution. We compare the shape parameters between the entire annual flood peak series and  
the series with annual flood peaks caused by tropical cyclones removed (Figure 10). We focus on the series with record length  
exceeding 30 years after annual flood peaks caused tropical cyclones being removed from the series. This leads to the exclusion  
of most stations in the southeastern coast due to the high percentage of tropical cyclone-induced flood peaks (Figure 9). As  
can be seen from Figure 10, the scatters are generally distributed along the 1:1 line, indicating overall small changes in the  
345 shape parameters between two series. However, if we restrict our attention to the stations with record floods caused by tropical  
cyclones (mainly those stations in northern China), we observe significantly smaller shape parameters (see the insert box plot  
in Figure 10) for the series with annual flood peaks caused by tropical cyclones removed. Smaller shape parameter implies  
a lighter tail of flood peak distribution. Small variations in the shape parameters as demonstrated for the rest of the stations  
indicate relatively weak impacts of tropical cyclones on the upper tail properties of flood peak distributions. These stations are  
350 mainly located in inland regions of southern China. Our results are different from the study of Villarini and Smith (2010) in  
eastern United States that shows significant decreases in shape parameters for the majority of stations when annual flood peaks  
caused by tropical cyclones are removed from the series. The differences are tied to contrasting flood-generation mechanisms  
between China and the eastern United States. Tropical cyclones and extratropical systems play central roles in the mixture

of flood-generation mechanisms for the flooding in the eastern United States (Smith et al., 2011). Extreme rainfall associated with East Asia Summer Monsoon, rather than landfalling tropical cyclones, can be a more important player in characterizing the upper tail of flood peak distributions in most inland regions of southern China (e.g., the middle and lower portion of the Yangtze River basin) (Zhang et al., 2017). Tropical cyclones in northern China, even though characterized with low frequency of occurrence, pose significant influences on the upper-tail properties of flood peak distributions.

We focus on tropical cyclones that produced relatively large numbers of flood peaks over China, to shed light on the physical attributes of most severe flood hazards associated with landfalling tropical cyclones. There are 9 tropical cyclones that produced more than 100 annual flood peaks over China since late 1950s till present. The 9 tropical cyclones alone contribute to approximately 50% of total annual flood peaks caused by tropical cyclones. Table 1 provides a summary of the 9 tropical cyclones. Typhoon Herb (1996) produced the largest number of annual flood peaks (167 in total), followed by Typhoon Wendy (1963) and Typhoon Tim (1994). Typhoon Herb (1996) produced a large number of annual flood peaks right after its landfall in mainland China (Figure 11a). Almost all the annual flood peaks caused by other tropical cyclones are distributed over the most inland regions (Figure 11). The percentage of stations with annual flood peaks caused by tropical cyclones relative to total storm-affected stations (i.e., located within 500 km buffer zone of each tropical cyclone track) varies between 14% (Typhoon Doris) and 35% (Typhoon Herb). Typhoon Andy (1982) and Typhoon Russ (1994) lead to annual flood peaks for more than 30% storm-affected stations (Table 1).

The 9 tropical cyclones can be further categorized into two groups according to the nature of the storm and spatial patterns of their tracks. The first group includes Typhoon Herb (1996), Typhoon Andy (1982), and Typhoon Nina (1975). The three tropical cyclones did not experience extratropical transition during the entire life cycle of the storms, and are characterized with two landfalls (i.e., Taiwan and mainland China). The tracks of these three tropical cyclones do not fall into the prevailing tropical cyclone tracks in the Western North Pacific basin (Wu et al., 2005). Typhoon Nina (1995) produced the largest number of record floods (24 in total) among all historical tropical cyclones over China, followed by Typhoon Polly (1960) (14 in total) and Typhoon Andy (1982) (10 in total). Annual flood peaks and record floods caused by tropical cyclones in the first group are frequently observed in northern China (mainly the middle portion of the Yellow River and the upper Huaihe River basins). This region is characterized with complex terrain, i.e., Taihang and Qinling Mountains. Interactions of tropical cyclones with regional topography can significantly enhance rainfall intensity through orographic lifting, as demonstrated by Typhoon Nina (1975). For instance, historical records of extreme rainfall (e.g., three-day rainfall accumulation exceeding 1000 mm) from Typhoon Nina (1975) were observed in the windward topographic region (Yang et al., 2017). The other 6 tropical cyclones are categorized into the second group (Figure 11). A common feature for the tropical cyclones in the second group is extratropical transition process during the life cycle of the storms. Annual flood peaks are frequently observed after the extratropical transition process (see the curvatures of tropical cyclone tracks in the latitudes around 30° in Figure 11), and are frequently observed in northern China. Except Typhoon Herb (1996), 4 of the top 5 largest number of annual flood peaks are caused by tropical cyclones with extratropical transition.

There is no strong preference for the spatial distribution of annual flood peaks with respect to storm tracks (i.e., left or right of the track), even though the records floods caused by tropical cyclones tend to be frequently observed in the left-front

quadrant (typically the down-shear side) of the circulations. This is related to the preferable distribution of extreme tropical  
390 cyclone rainfall, due to enhanced moisture convergence and updraft on the down-shear side of the circulation (e.g., Atallah  
et al., 2007; Shu et al., 2018).

## 5 Summary and Conclusions

In this study, we examine flood peak distributions over China based on 1120 stream gauging stations with continuous records  
of annual maximum instantaneous discharge for more than 50 years. The principal findings of this study can be summarized  
395 as follows.

(1) There are 38% and 35% stations exhibiting significant change points in mean and in variance, respectively. Change  
points tend to occur during the period 1980-2000, and show strong a spatial concentration in the lower Yellow River, upper  
Huaihe River, the entire Haihe River, upper Yangtze and Pearl River basins. Hydrological regimes in these regions demonstrate  
intensive anthropogenic influences, for instance, large hydro-power generation dams, cascade constructions of small-capacity  
400 reservoirs, transboundary water-transfer projects, soil-water conservation projects, urbanization. There is a weak signal of  
climate impacts on the abrupt changes in annual flood series across China. Abrupt change is the dominant mode of violation  
of the stationary assumption for annual flood peaks over China.

(2) Approximately 6% stations (69 in total) show significant linear trends in the annual flood peak series. Those stations  
with significant trends are uniformly distributed across the country, with 62 of them exhibiting significantly decreasing trends.  
405 The decreasing trends of flood peak magnitude in northern China may be at least partially tied to changes in extreme rainfall.  
Disconnections between changes in annual rainfall extremes and annual maximum floods are identified in southern China, and  
highlight complex flood-generation processes across China. The dominance of decreasing trends in annual flood peak series  
indicates weakening tendencies of severe flood hazards (i.e., annual maximum floods) over China, even though flood-affected  
area and economic damages are on the rise in recent decades (Kundzewicz et al., 2019). Future studies need to further examine  
410 changes in flood frequency for a complete assessment on flood hazards (based on peaks-over-threshold flood series, similarly  
see, e.g., Mallakpour and Villarini, 2015).

(3) We fit GEV distribution for the stationary time series of annual flood peaks, and examined the dependence of its pa-  
rameters on drainage area. We find that the location and scale parameters are linearly scaled with drainage area in a log-log  
domain. There is only a weak tendency for the shape parameters to decrease as a function of drainage area. Our results highlight  
415 scale-independent properties of upper tails of flood peaks. The relationships between GEV parameters and drainage area show  
strong spatial splits between northern and southern China, indicating space-time rainfall organization as an important player in  
determining the upper-tail properties of flood peak distributions over China. Procedures for regional flood frequency analysis  
should explicitly address the spatial splits through considering spatial heterogeneity in flood hydroclimatology.

(4) Flood-generation systems over China show a mixture of monsoon, tropical cyclones, and extratropical systems. Tropical  
420 cyclone plays an important role in characterizing spatial-temporal variability of flood peaks and the upper-tail properties of  
flood peak distributions over China. More than 50% of the annual flood peaks in the southeastern coast are caused by tropical



cyclones. The percentage progressively decreases when we move further inland and to higher latitudes. Tropical cyclones lead to heavier tails of flood peak distributions (with larger shape parameters of the GEV distribution) in northern China. Those regions are characterized with record floods frequently associated with tropical cyclones, despite that tropical cyclone visits relatively infrequently compared to the southern China. Record floods in southern China are more frequently associated with monsoon-related extreme rainfall rather than landfalling tropical cyclones. We highlight the importance of considering the mixture of flood-generation mechanisms in flood frequency analyses especially in northern China. Contrasting roles of tropical cyclones in flood peak distributions highlight the necessity of tailored procedures for flood-control practices and flood hazard assessment across China. For instance, landfalling tropical cyclones can be good candidates for PMP/PMF designs for drainage basins in northern rather than southern China.

(5) Tropical cyclone plays an important role in most severe flood hazards in the history of China. There are 9 tropical cyclones that produced more than 100 annual flood peaks over China, contributing to approximately 50% of total annual flood peaks caused by all historical tropical cyclones. The large number of annual flood peaks is associated with extended spatial coverages of extreme rainfall after the storms going through the processes of extratropical transition. An additional feature for severe flood hazards is tied to favorable synoptic set-up for persistent moisture transport after the storm making landfall, as demonstrated by Typhoon Herb (1996), Typhoon Andy (1982), and Typhoon Nina (1975). Interaction of tropical cyclone with regional topography is a key element for most extreme floods in central China (mainly the middle/lower Yellow River basin and upper Huaihe River basin). Annual flood peaks caused by tropical cyclones do not show strong spatial preferences with respect to the tracks, even though the record floods tend to be frequently observed in the left-front quadrant of the circulation. Hydrometeorological analyses can provide improved physical characterization on severe flood hazards associated with landfalling tropical cyclones (see e.g., Yang et al., 2017).

Attribution analysis on the nonstationarities of annual flood peaks across China point to mixed controls of human activities, external climate factors (i.e., extreme rainfall), and changes in soil moisture on flood hydrology. The homogeneity of flood population for flood frequency analysis needs to be carefully revisited in a changing environment. This is especially proposed by England et al. (2018) in Hydrology Subcommittee Bulletin 17C as an imminent need to “define flood potentials for watersheds altered by urbanization, wildfires, deforestation, and by reservoirs”. Innovative approaches that explicitly address the nonstationarities should be embraced for flood frequency analysis across China, for instance, process-based approaches that rely on physically-based hydrological modelling which can represent the processes of nonstationarities in flood series (see e.g., Wright et al., 2014; Yu et al., 2018), statistical modelling approaches that mathematically parametrize the role of human regulations in flood series based on the framework of probability theory (Salas et al., 2018; Serago and Vogel, 2018; Gao et al., 2019; Dong et al., 2019; Barth et al., 2019). These approaches should be especially in great needs for northern China that exhibits an overwhelming portion of stations with nonstationarities in flood series.

Our results highlight the important role of landfalling tropical cyclones in determining the upper tails of flood peak distributions across China, especially the northern China and the southeastern coast. Previous studies show strong teleconnections between tropical cyclone activity in the western North Pacific basin and large-scale climate variability, e.g., the El Niño-Southern Oscillation (e.g., Chan and Shi, 1996; Chan, 2000), Madden-Julian Oscillation (e.g., Kim et al., 2008). Statistical

models that adopt varying parameters on time or other predictors (such as, large-scale climate indices) can provide predictive tools of understanding future changes in flood hazards associated with landfalling tropical cyclones (e.g., Zhang et al., 2018c). Future studies need to zoom into watershed scales, and explore physical connections between extreme flood processes and  
460 key tropical cyclone features (e.g., space-time structures of tropical cyclone rainfall, tropical cyclone intensity), to provide additional insights into flood hazard associated with landfalling tropical cyclones.

A unique feature of our study is a nation-wide assessment of flood hazard based on an unprecedented network of stream gauging stations across China. Comprehensive analysis based on the exceptional dataset over China, together with studies by Villarini et al. (2009) and Burn and Whitfield (2018) in North America, Blöschl et al. (2017, 2019) in European countries,  
465 among others, promotes improved understandings on flood hydrology and hydroclimatology under a changing environment from a global perspective. A future endeavor will further exploit the dataset through developing a data archive of key hydrological indices that is accessible to worldwide research community.

*Data availability.* The data used in this research are collected from distributed hydrological offices of major river basins over China. The dataset is unavailable to access due to licensing issues at the moment.

470 *Author contributions.* L.Y. designed the study and carried out the analysis. L.Y. wrote the manuscript with the contribution of L. W. All authors contributed to the discussion and revision.

*Competing interests.* The authors declare that they have no conflict of interest.

*Acknowledgements.* This research is supported by the Strategic Priority Research Program of the Chinese Academy of Sciences (XDA230402). LX acknowledges support from the National Science Foundation of China (51609256) and the Young Elite Scientists Sponsorship Program  
475 by the China Association for Science and Technology (2017QNRC001). The authors would like to acknowledge Gabriele Villarini from the University of Iowa and James Smith from Princeton University for pre-review comments, Dr. Hong Do and the other anonymous reviewer for review comments, which substantially improve the manuscript. The authors would like to extend sincere thanks to colleagues and collaborators from hydrographic offices of major river basins across China for their exceptional contribution to this dataset.

## References

- 480 Arnell, N. W. and Gosling, S. N.: The impacts of climate change on river flood risk at the global scale, *Climatic Change*, 134, 387–401, 2016.
- Atallah, E., Bosart, L. F., and Ayyer, A. R.: Precipitation distribution associated with landfalling tropical cyclones over the Eastern United States, *Monthly Weather Review*, 135, 2185–2206, 2007.
- Atallah, E. H. and Bosart, L. F.: The Extratropical Transition and precipitation distribution of Hurricane Floyd (1999), *Monthly Weather Review*, 131, 1063–1081, 2003.
- 485 Ayalew, T. B., Krajewski, W. F., Mantilla, R., Wright, D. B., and Small, S. J.: Effect of spatially distributed small dams on flood frequency: insights from the Soap Creek watershed, *Journal of Hydrologic Engineering*, 22, 04017 011, 2017.
- Bai, P., Liu, X., Liang, K., and Liu, C.: Investigation of changes in the annual maximum flood in the Yellow River basin, China, *Quaternary International*, 392, 168–177, 2016.
- Barros, A. P., Duan, Y., Brun, J., and Medina, M. A.: Flood nonstationarity in the Southeast and Mid-Atlantic regions of the United States, 490 *Journal of Hydrologic Engineering*, 19, 05014 014, 2014.
- Barth, N. A., Ph, D., Villarini, G., Ph, D., White, K., and Ph, D.: Accounting for Mixed Populations in Flood Frequency Analysis : Bulletin 17C Perspective, *Journal of Hydrologic Engineering*, 24, 1–12, 2019.
- Bates, N. S., Smith, J. A., and Villarini, G.: Flood response for the watersheds of the Fernow Experimental Forest in the central Appalachians, *Water Resources Research*, 51, 4431–4453, 2015.
- 495 Berghuijs, W. R., Woods, R. A., Hutton, C. J., and Sivapalan, M.: Dominant flood generating mechanisms across the United States, *Geophysical Research Letters*, 43, 4382–4390, 2016.
- Blöschl, G., Hall, J., Parajka, J., Perdigão, R. A. P., Merz, B., Arheimer, B., Aronica, G. T., Bilibashi, A., Bonacci, O., Borga, M., Ivan, Č., Castellarin, A., and Chirico, G. B.: Changing climate shifts timing of European floods, *Science*, 357, 588–590, 2017.
- Blöschl, G., Hall, J., Viglione, A., Perdigão, R., Parajka, R., Merz, B., Lun, D., Arheimer, B., Aronica, G., Bilibashi, A., Boháč, M., Bonacci, 500 O., Borga, M., Čanjevac, I., Castellarin, A., Chirico, G., Claps, P., Frolova, N., Ganora, D., Gorbachova, L., Gül, A., Hannaford, J., Harrigan, S., Kireeva, M., Kiss, A., Kjeldsen, T., Kohnová, S., Koskela, J., Ledvinka, O., Macdonald, N., Mavrova-Guirguinova, M., Mediero, L., Merz, R., Molnar, P., Montanari, A., Murphy, C., Osuch, M., Ovcharuk, V., Radevski, I., Salinas, J., Sauquet, E., Šraj, M., Szolgay, J., Volpi, E., Wilson, D., Zaimi, K., and Živković, N.: Changing climate both increases and decreases European floods, *Nature*, 573, 108–111, 2019.
- 505 Brooks, F. and Day, C. A.: Analyzing the Mixed Flood Hydroclimatology of the Red River Basin, Kentucky, *Journal of the Kentucky Academy of Science*, 75, 47–52, 2015.
- Burn, D. H. and Whitfield, P. H.: Changes in flood events inferred from centennial length streamflow data records, *Advances in Water Resources*, 121, 333–349, 2018.
- Chan, J. C.: Tropical Cyclone Activity over the Western North Pacific Associated with El Niño and La Niña Events, *Journal of Climate*, 13, 510 2960–2972, 2000.
- Chan, J. C. and Shi, J. E.: Long-term trends and interannual variability in tropical cyclone activity over the western North Pacific, *Geophysical Research Letters*, 23, 2765–2767, 1996.
- Cleveland, W.: Robust locally weighted regression and smoothing scatterplots, *Journal of the American Statistical Association*, 74, 829–836, 1979.
- 515 Coles, S.: An introduction to statistical modeling of extreme values, Springer, London, 2001.

- Costa, J. E.: A comparison of the largest rainfall-runoff floods in the United States with those of the People's Republic of China and the world, *Journal of Hydrology*, 96, 101–115, 1987.
- Dankers, R., Arnell, N. W., Clark, D. B., Falloon, P. D., Fekete, B. M., Gosling, S. N., Heinke, J., Kim, H., Masaki, Y., Satoh, Y., Stacke, T., Wada, Y., and Wisser, D.: First look at changes in flood hazard in the Inter-Sectoral Impact Model Intercomparison Project ensemble, 520 *Proceedings of the National Academy of Sciences*, 111, 3257–3261, 2014.
- Ding, Y. and Chan, J. C. L.: The East Asian summer monsoon: an overview, *Meteorology and Atmospheric Physics*, 89, 117–142, 2005.
- Ding, Y. and Zhang, J.: *Torrential Rains and Flashing Floods*, Meteorological Press, 2009.
- Do, H. X., Westra, S., and Leonard, M.: A global-scale investigation of trends in annual maximum streamflow, *Journal of Hydrology*, 552, 28–43, 2017.
- 525 Do, H. X., Zhao, F., Westra, S., Leonard, M., Gudmundsson, L., Chang, J., Ciais, P., Gerten, D., Gosling, S. N., Schmied, H. M., Stacke, T., Stanislas, B. J. E., and Wada, Y.: Historical and future changes in global flood magnitude &ndash; evidence from a model-observation investigation, *Hydrology and Earth System Sciences Discussions*, pp. 1–31, 2019.
- Dong, Q., Zhang, X., Lall, U., Sang, Y.-f., and Xie, P.: An improved nonstationary model for flood frequency analysis and its implication to the Three Gorges Dam, China, *Hydrological Sciences Journal*, 0, 02626 667.2019.1596 274, 2019.
- 530 Eden, J. M., Wolter, K., Otto, F. E. L., Harvey, H., Environ, A., and Lett, R.: Attribution of extreme rainfall from Hurricane Harvey, August 2017, *Environmental Research Letters*, 12, 2017.
- England, J. F., Cohn, T. A., Faber, B. A., Stedinger, J. R., Thomas Jr., W. O., Veilleux, A. G., Kiang, J. E., and Mason Jr., R. R.: Guidelines for determining flood flow frequency—Bulletin 17C, Tech. rep., Reston, VA, <https://doi.org/10.3133/tm4B5>, <http://pubs.er.usgs.gov/publication/tm4B5>, 2018.
- 535 Enzel, Y., Ely, L. L., House, P. K., Baker, R., and Webb, R. H.: Paleoflood Evidence for a Natural Upper Bound to Flood Magnitudes in the Colorado River Basin basin, *Water Resources Research*, 29, 2287–2297, 1993.
- Franks, S. W. and Kuczera, G.: Flood frequency analysis: evidence and implications of secular climate variability, New South Wales, *Water Resources Research*, 38, 1–7, 2002.
- Gao, S., Liu, P., Pan, Z., Ming, B., Guo, S., Cheng, L., and Wang, J.: Incorporating reservoir impacts into flood frequency distribution 540 functions, *Journal of Hydrology*, 568, 234–246, 2019.
- Gaume, E.: Flood frequency analysis: The Bayesian choice, *Wiley Interdisciplinary Reviews: Water*, 5, e1290, 2018.
- Gu, X., Zhang, Q., Singh, V. P., Liu, L., and Shi, P.: Spatiotemporal patterns of annual and seasonal precipitation extreme distributions across China and potential impact of tropical cyclones, *International Journal of Climatology*, 37, 3949–3962, 2017a.
- Gu, X., Zhang, Q., Singh, V. P., and Shi, P.: Nonstationarity in timing of extreme precipitation across China and impact of tropical cyclones, 545 *Global and Planetary Change*, 149, 153–165, 2017b.
- Hart, R. E. and Evans, J. L.: A climatology of the extratropical transition of Atlantic tropical cyclones, *Journal of Climate*, 14, 546–564, 2000.
- Held, I. M. and Soden, B. J.: Robust Responses of the Hydrological Cycle to Global Warming, *Journal of Climate*, 19, 1–14, 2006.
- Hirabayashi, Y., Mahendran, R., Koirala, S., Konoshima, L., Yamazaki, D., Watanabe, S., Kim, H., and Kanae, S.: Global flood risk under 550 climate change, *Nature Climate Change*, 3, 816–821, 2013.
- Hirschboeck, K. K.: Flood hydroclimatology, in: *Flood Geomorphology*, edited by Baker, V. R., Kockel, R. C., and Patton, P. C., pp. 27–49, John Wiley, New York, 1988.

- Hodgkins, G., Dudley, R., Archfield, S., and Renard, B.: Effects of climate, regulation, and urbanization on historical flood trends in the United States, *Journal of Hydrology*, 2019.
- 555 Houze, R.: Orographic Effects on Precipitating Clouds, *Reviews of Geophysics*, pp. 1–47, 2012.
- Ishak, E. H., Rahman, A., Westra, S., Sharma, A., and Kuczera, G.: Evaluating the non-stationarity of Australian annual maximum flood, *Journal of Hydrology*, 494, 134–145, 2013.
- Ivancic, T. J. and Shaw, S. B.: Examining why trends in very heavy precipitation should not be mistaken for trends in very high river discharge, *Climatic Change*, 133, 681–693, 2015.
- 560 Jarrett, R. D. and Costa, J. E.: Evaluation of the flood hydrology in the Colorado Front Range using precipitation, streamflow, and paleoflood data for the Big Thompson River basin, Tech. rep., <https://doi.org/10.3133/wri874117>, <http://pubs.er.usgs.gov/publication/wri874117>, 1988.
- Jiang, F. and Jiang, B.: Study on impacts of typhoon on China and its characteristics, *Yangtze River*, 45, 1–5, 2014.
- Katz, R. W., Parlange, M. B., and Naveau, P.: Statistics of extremes in hydrology, *Advances in Water Resources*, 25, 1287–1304, 2002.
- 565 Kendall, M.: Rank correlation methods, Charles Griffin, London, 1975.
- Kim, J. H., Ho, C. H., Kim, H. S., Sui, C. H., and Park, S. K.: Systematic variation of summertime tropical cyclone activity in the western North Pacific in relation to the Madden-Julian oscillation, *Journal of Climate*, 21, 1171–1191, 2008.
- Kundzewicz, Z., Su, B., Wang, Y., Xia, J., Huang, J., and Jiang, T.: Flood risk and its reduction in China, *Advances in Water Resources*, <https://doi.org/10.1016/j.advwatres.2019.05.020>, <https://linkinghub.elsevier.com/retrieve/pii/S0309170818308339>, 2019.
- 570 Leonard, M., Westra, S., Phatak, A., Lambert, M., Hurk, B. V. D., McInnes, K., Risbey, J., Jakob, D., and Stafford-smith, M.: A compound event framework for understanding extreme impacts, *WIREs Clim Change*, 5, 113–128, 2014.
- Liu, M. and Smith, J. A.: Extreme rainfall from landfalling tropical cyclones in the Eastern United States: Hurricane Irene (2011), *Journal of Hydrometeorology*, 17, 2883–2904, 2016.
- Liu, S., Huang, S., Xie, Y., Wang, H., Leng, G., Huang, Q., Wei, X., and Wang, L.: Identification of the Non-stationarity of Floods: Changing  
575 Patterns, Causes, and Implications, *Water Resources Management*, 2018.
- Lu, W., Lei, H., Yang, D., Tang, L., and Miao, Q.: Quantifying the impacts of small dam construction on hydrological alterations in the Jiulong River basin of Southeast China, *Journal of Hydrology*, 567, 382–392, 2018.
- Ma, S., Zhou, T., Dai, A., and Han, Z.: Observed changes in the distributions of daily precipitation frequency and amount over China from 1960 to 2013, *Journal of Climate*, 28, 6960–6978, 2015.
- 580 Mallakpour, I. and Villarini, G.: The changing nature of flooding across the central United States, *Nature Climate Change*, 5, 250–254, 2015.
- Mann, H. B.: Nonparametric tests against trend, *Econometrica*, 13, 245–259, 1945.
- Marvel, K. and Bonfils, C.: Identifying external influences on global precipitation, *Proceedings of the National Academy of Sciences*, 110, 19301–19306, 2013.
- Matteson, D. S. and James, N. A.: A nonparametric approach for multiple change point analysis of multivariate data, *Journal of the American  
585 Statistical Association*, 109, 334–345, 2014.
- Mediero, L., Santillán, D., Garrote, L., and Granados, A.: Detection and attribution of trends in magnitude, frequency and timing of floods in Spain, *Journal of Hydrology*, 517, 1072–1088, 2014.
- Milly, P. C. D., Wetherald, R. T., Dunne, K. A., and Delworth, T. L.: Increasing risk of great floods in a changing climate, *Nature*, 415, 4–7, 2002.

- 590 Milly, P. C. D., Bentacourt, J., Falkenmark, M., Robert, M., Hirsch, R. M., Kundzewicz, Z. W., Lettenmaier, D. P., and Stouffer, R. J.: Stationarity is dead: whither water management? , *Science*, 319, 573–574, 2008.
- Montanari, A. and Koutsoyiannis, D.: Modeling and mitigating natural hazards: Stationarity is immortal!, *Water Resources Research*, 50, 9748–9756, 2014.
- Morrison, J. E. and Smith, J. A.: Stochastic modeling of flood peaks using the generalized extreme value distribution, *Water Resources*  
595 *Research*, 38, 2002.
- O’Connor, J. E., Grant, G. E., and Costa, J. E.: The Geology and Geography of Floods, *Ancient Floods Mod. Hazards*, 5, 359–385, 2002.
- Petrow, T. and Merz, B.: Trends in flood magnitude, frequency and seasonality in Germany in the period 1951-2002, *Journal of Hydrology*, 371, 129–141, 2009.
- Pettitt, A. N.: A non-parametric approach to the change-point problem, *Applied Statistics*, 1, 126–135, 1979.
- 600 Rappaport, E. N.: Fatalities in the united states from atlantic tropical cyclones: New data and interpretation, *Bulletin of the American Meteorological Society*, 95, 341–346, 2014.
- Ren, F., Wu, G., Wang, X., and Wang, Y.: Changes in tropical cyclone precipitation over China, *Indian Ocean Tropical Cyclones and Climate Change*, 33, 25–28, 2010.
- Rios Gaona, M. F., Villarini, G., Zhang, W., and Vecchi, G. A.: The added value of IMERG in characterizing rainfall in tropical cyclones,  
605 *Atmospheric Research*, 209, 95–102, 2018.
- Risser, M. D. and Wehner, M. F.: Attributable Human-Induced Changes in the Likelihood and Magnitude of the Observed Extreme Precipitation during Hurricane Harvey, *Geophysical Research Letters*, 44, 12,457–12,464, 2017.
- Robson, A. J.: Evidence for trends in UK flooding, *Philosophical Transactions of the Royal Society A: Mathematical, Physical and Engineering Sciences*, 360, 1327–1343, 2002.
- 610 Robson, A. J., Jones, T. K., Reed, D. W., and Bayliss, A. C.: A study of national trend and variation in UK floods, *International Journal of Climatology*, 18, 165–182, 1998.
- Salas, J. D., Obeysekera, J., and Vogel, R. M.: Techniques for assessing water infrastructure for nonstationary extreme events: a review, *Hydrological Sciences Journal*, 63, 325–352, 2018.
- Schaller, N., Kay, A. L., Lamb, R., Massey, N. R., Van Oldenborgh, G. J., Otto, F. E., Sparrow, S. N., Vautard, R., Yiou, P., Ashpole, I.,  
615 Bowery, A., Crooks, S. M., Hausteine, K., Huntingford, C., Ingram, W. J., Jones, R. G., Legg, T., Miller, J., Skeggs, J., Wallom, D., Weisheimer, A., Wilson, S., Stott, P. A., and Allen, M. R.: Human influence on climate in the 2014 southern England winter floods and their impacts, *Nature Climate Change*, 6, 627–634, 2016.
- Serago, J. M. and Vogel, R. M.: Parsimonious nonstationary flood frequency analysis, *Advances in Water Resources*, 112, 1–16, 2018.
- Serinaldi, F. and Kilsby, C. G.: Rainfall extremes : Toward reconciliation after the battle of distributions, *Water Resources Research*, 50,  
620 336–352, 2014.
- Sharma, A., Wasko, C., and Lettenmaier, D. P.: If Precipitation Extremes Are Increasing, Why Aren’t Floods?, *Water Resources Research*, 54, 8545–8551, 2018.
- Shu, S., Feng, X., and Wang, Y.: Essential role of synoptic environment on rainfall distribution of landfalling tropical cyclones Over China, *Journal of Geophysical Research: Atmospheres*, 123, 11,285–11,306, 2018.
- 625 Si, Y., Li, X., Yin, D., Li, T., and Cai, X.: PT State Key Laboratory of Simulation and Regulation of Water Cycle in River Basin , China Institute of, *Science of the Total Environment*, 682, 1–18, 2019.

- Singh, V. P., Wang, S. X., and Zhang, L.: Frequency analysis of nonidentically distributed hydrologic flood data, *Journal of Hydrology*, 307, 175–195, 2005.
- Small, D., Islam, S., and Vogel, R. M.: Trends in precipitation and streamflow in the eastern U.S.: Paradox or perception?, *Geophysical Research Letters*, 33, 2–5, 2006.
- 630 Smith, J. A. and Baeck, M. L.: "Prophetic vision, vivid imagination": The 1927 Mississippi River flood, *Water Resources Research*, 51, 9127–9140, 2015.
- Smith, J. A., Baeck, M. L., Villarini, G., and Krajewski, W. F.: The hydrology and hydrometeorology of flooding in the Delaware River basin, *Journal of Hydrometeorology*, 11, 841–859, 2010.
- 635 Smith, J. A., Villarini, G., and Baeck, M. L.: Mixture distributions and the hydroclimatology of extreme rainfall and flooding in the Eastern United States, *Journal of Hydrometeorology*, 12, 294–309, 2011.
- Smith, J. A., Cox, A. A., Baeck, M. L., Yang, L., and Bates, P.: Strange floods: the upper tail of flood peaks in the United States, *Water Resources Research*, 54, 6510–6542, 2018.
- Svensson, C. and Berndtsson, R.: Characterization of extreme rainfall in an East Asian monsoon-climate catchment in the upper reaches of  
640 the Huai River, China, *International Journal of Climatology*, 16, 321–337, 1996.
- Tan, X. and Gan, T. Y.: Nonstationary analysis of annual maximum streamflow of Canada, *Journal of Climate*, 28, 1788–1805, 2014.
- Trenberth, K. E., Fasullo, J. T., and Shepherd, T. G.: Attribution of climate extreme events, *Nature Climate Change*, 5, 725–730, 2015.
- Villarini, G.: On the seasonality of flooding across the continental United States, *Advances in Water Resources*, 87, 80–91, 2016.
- Villarini, G. and Smith, J. A.: Flood peak distributions for the eastern United States, *Water Resources Research*, 46, 1–17, 2010.
- 645 Villarini, G., Serinaldi, F., Smith, J. A., and Krajewski, W. F.: On the stationarity of annual flood peaks in the continental United States during the 20th century, *Water Resources Research*, 45, 1–17, 2009.
- Villarini, G., Smith, J. A., Serinaldi, F., and Ntelekos, A. A.: Analyses of seasonal and annual maximum daily discharge records for central Europe, *Journal of Hydrology*, 399, 299–312, 2011.
- Villarini, G., Smith, J. A., Serinaldi, F., Ntelekos, A. A., and Schwarz, U.: Analyses of extreme flooding in Austria over the period 1951–2006,  
650 *International Journal of Climatology*, 32, 1178–1192, 2012.
- Villarini, G., Goska, R., Smith, J. A., and Vecchi, G. A.: North atlantic tropical cyclones and U.S. flooding, *Bulletin of the American Meteorological Society*, 95, 1381–1388, 2014.
- Vogel, R. M., Yaindl, C., and Walter, M.: Nonstationarity: Flood magnification and recurrence reduction factors in the united states, *Journal of the American Water Resources Association*, 47, 464–474, 2011.
- 655 Wasko, C. and Nathan, R.: Influence of changes in rainfall and soil moisture on trends in flooding, *Journal of Hydrology*, <https://doi.org/10.1016/j.jhydrol.2019.05.054>, <https://linkinghub.elsevier.com/retrieve/pii/S0022169419304998>, 2019.
- Wright, D. B., Smith, J. A., and Baeck, M. L.: Flood frequency analysis using radar rainfall fields and stochastic storm transposition, *Water Resources Research*, 50, 191–203, 2014.
- Wu, L., Wang, B., and Geng, S.: Growing typhoon influence on east Asia, *Geophysical Research Letters*, 32, 1–4, 2005.
- 660 Yan, L., Xiong, L., Liu, D., Hu, T., and Xu, C.-Y.: Frequency analysis of nonstationary annual maximum flood series using the time-varying two-component mixture distributions, *Hydrological Processes*, 89, 69–89, 2017.
- Yan, L., Xiong, L., Ruan, G., Xu, C.-Y., Yan, P., and Liu, P.: Reducing uncertainty of design floods of two-component mixture distributions by utilizing flood timescale to classify flood types in seasonally snow covered region, *Journal of Hydrology*, 2019.

- Yang, L., Villarini, G., Smith, J. A., Tian, F., and Hu, H.: Changes in seasonal maximum daily precipitation in China over the period 1961-  
665 2006, *International Journal of Climatology*, 33, 1646–1657, 2013.
- Yang, L., Liu, M., Smith, J. A., and Tian, F.: Typhoon Nina and the August 1975 Flood over Central China, *Journal of Hydrometeorology*,  
18, 451–472, 2017.
- Yang, T., Zhang, Q., Chen, Y. D., Tao, X., Xu, C.-Y., and Chen, X.: A spatial assessment of hydrologic alteration caused by dam construction  
in the middle and lower Yellow River, China, *Hydrological Processes*, 22, 3829–3843, 2008.
- 670 Yu, G., Wright, D. B., Zhu, Z., Smith, C., and Holman, K. D.: Process-based flood frequency analysis in an agricultural watershed exhibiting  
nonstationary flood seasonality, *Hydrology and Earth System Sciences Discussions*, pp. 1–30, 2018.
- Zhang, Q., Wu, L., and Liu, Q.: Tropical cyclone damages in China 1983-2006, *Bulletin of the American Meteorological Society*, 90, 489–  
495, 2009.
- Zhang, Q., Gu, X., Singh, V. P., Xiao, M., and Xu, C.-Y.: Stationarity of annual flood peaks during 1951-2010 in the Pearl River basin, China,  
675 *Journal of Hydrology*, 519, 3263–3274, 2014.
- Zhang, Q., Gu, X., Singh, V. P., Xu, C.-y., Kong, D., and Xiao, M.: Homogenization of precipitation and flow regimes across China : Changing  
properties , causes and implications, *Journal of Hydrology*, 530, 462–475, 2015.
- Zhang, Q., Gu, X., Singh, V. P., Sun, P., Chen, X., and Kong, D.: Magnitude, frequency and timing of floods in the Tarim River basin, China:  
changes, causes and implications, *Global and Planetary Change*, 139, 44–55, 2016.
- 680 Zhang, Q., Zheng, Y., Singh, V. P., Luo, M., and Xie, Z.: Summer extreme precipitation in eastern China: mechanisms and impacts, *Journal  
of Geophysical Research*, 122, 2766–2778, 2017.
- Zhang, Q., Gu, X., Li, J., Shi, P., and Singh, V. P.: The impact of tropical cyclones on extreme precipitation over coastal and Inland Areas of  
China and its association to ENSO, *Journal of Climate*, 31, 1865–1880, 2018a.
- Zhang, Q., Gu, X., Singh, V. P., Shi, P., and Sun, P.: More frequent flooding? Changes in flood frequency in Pearl River, *Hydrology and Earth  
685 System Sciences*, 22, 2637–2653, 2018b.
- Zhang, W., Villarini, G., Vecchi, G. A., and Smith, J. A.: Urbanization exacerbated the rainfall and flooding caused by hurricane Harvey in  
Houston, *Nature*, 563, 384–388, 2018c.



**Table 1.** Summary of tropical cyclones that produced more than 100 annual flood peaks over China. All the stations that are located within the 500 km buffer zone of each tropical cyclone track are counted. The “storm type” column shows whether the tropical cyclone experienced extratropical transition (ET) or not (TS).

| Rank | Storm name    | Total No. of storm-affected stations | Total No. of annual flood peaks | No. of record floods | Storm type |
|------|---------------|--------------------------------------|---------------------------------|----------------------|------------|
| 1    | Herb (1996)   | 465                                  | 167                             | 4                    | TS         |
| 2    | Wendy (1963)  | 622                                  | 159                             | 6                    | ET         |
| 3    | Tim (1994)    | 591                                  | 156                             | 2                    | ET         |
| 4    | Freda (1984)  | 634                                  | 144                             | 2                    | ET         |
| 5    | Doris (1961)  | 836                                  | 119                             | 2                    | ET         |
| 6    | Winnie (1997) | 482                                  | 114                             | 0                    | ET         |
| 7    | Andy (1982)   | 375                                  | 111                             | 10                   | TS         |
| 8    | Russ (1994)   | 330                                  | 104                             | 1                    | ET         |
| 9    | Nina (1975)   | 441                                  | 102                             | 24                   | TS         |

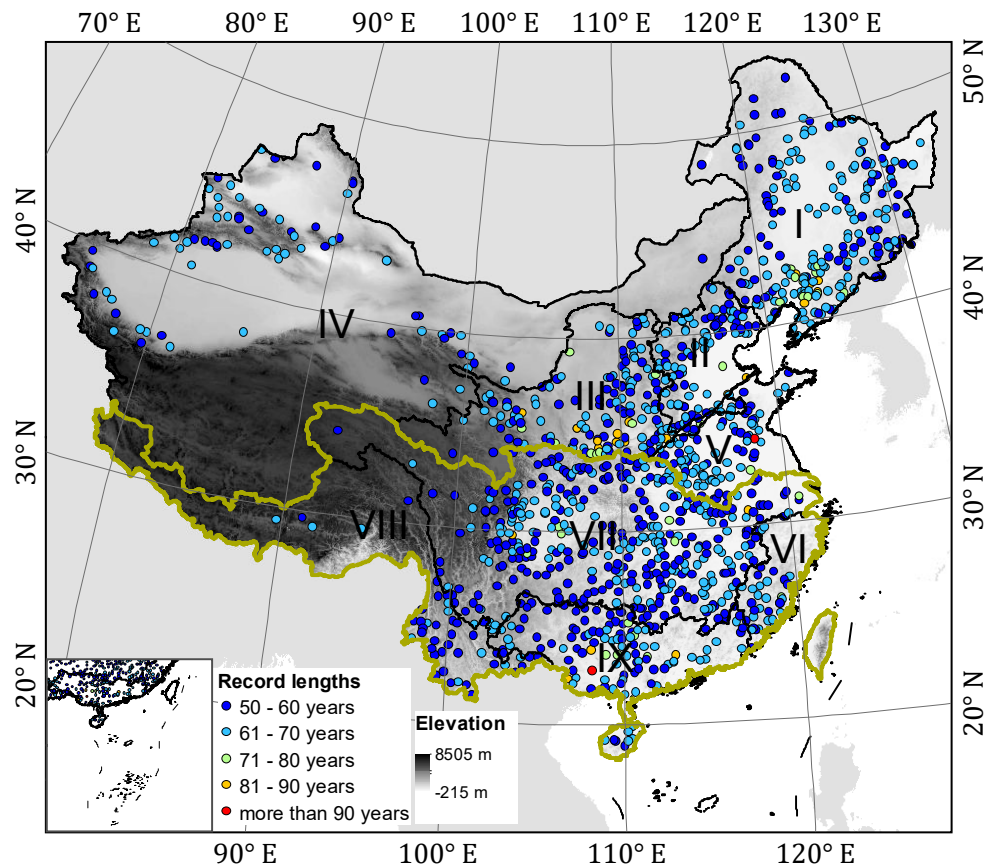

**Figure 1.** Overview of the stream gauging stations with record lengths of more than 50 years over China (1120 gauges in total). Scatter shading represents the record length (in years) for each station. The grey shading represents topography, while the black lines represent the first-level hydrologic units. The Roman numerals highlight the nine major hydrologic units in China: I-Northeastern river basins, II-Haihe River basin, III-Yellow River Basin, IV-Northwestern river basins, V-Huaihe River basin, VI-Southeastern river basins, VII-Yangtze River basin, VIII-Southwestern river basin, and IX-Pearl River basin. Olive line shows the boundary of river basins in southern China (VI-IX), with the rest of the river basins in northern China (I-V).



**Figure 2.** (a) Time series of total number of available stations (with record lengths of more than 50 years) for each year. Histograms of all the 1120 stream gauging stations sorted by (b) record lengths and (c) drainage areas.



**Figure 3.** Change points in (a) mean and (b) variance. Color represents the year of change-point occurrence. The insert plot shows the histogram of the years of change-point occurrence (y-axis represents the number of change points, while x-axis represents the ending year of a 10-year period, e.g., 1990 actually means 1980-1990). Only stations with results being statistically significant (at the level of 5%) are shown.



**Figure 4.** Time series of annual flood peaks for four stream gauging stations with strong human interventions: (a) large hydroelectric dams (upper Yellow River, ID: 40100500), (b) a cascade of small reservoirs (upper Haihe River, ID: 30909100), (c) urbanization (a tributary in the lower Yangtze River, ID: 63205400), and (d) transboundary water-transfer project (a tributary in the lower Yellow River, ID: 41800701). Locations of the four stations are represented by the numbers in brackets in Figure 3, with (1) to (4) corresponding to (a) to (d), respectively. Black lines indicate the year of occurrence for change point in mean. Results are based on the Pettitt's test. Only stations with Pettitt's test being statistically significant (at the level of 5%) are shown.

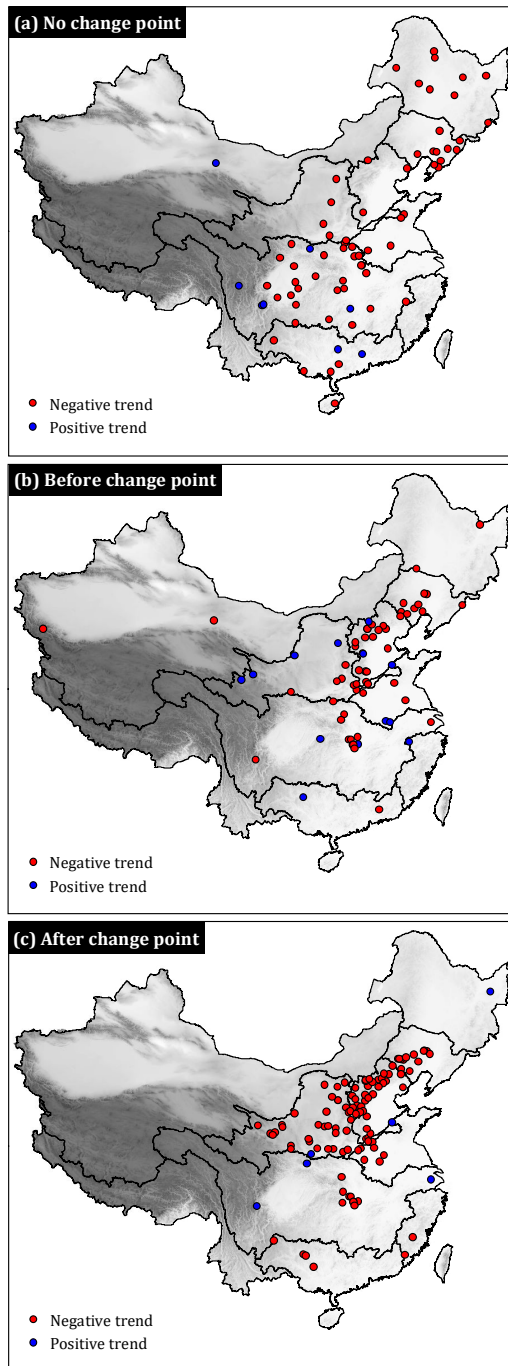

**Figure 5.** Mann-Kendall test results for stations (a) without change point in mean and (b,c) with change point in mean. Results are statistically significant at the level of 5%. Different number of data points between (b) and (c) are associated with (1) insufficient record lengths for sub-groups before or after change points, (2) linear trends for either sub-group being not statistically significant.



**Figure 6.** Seasonality of annual maximum flood peaks for northern China (red), southern China (blue), and annual flood peaks caused by tropical cyclones (black).

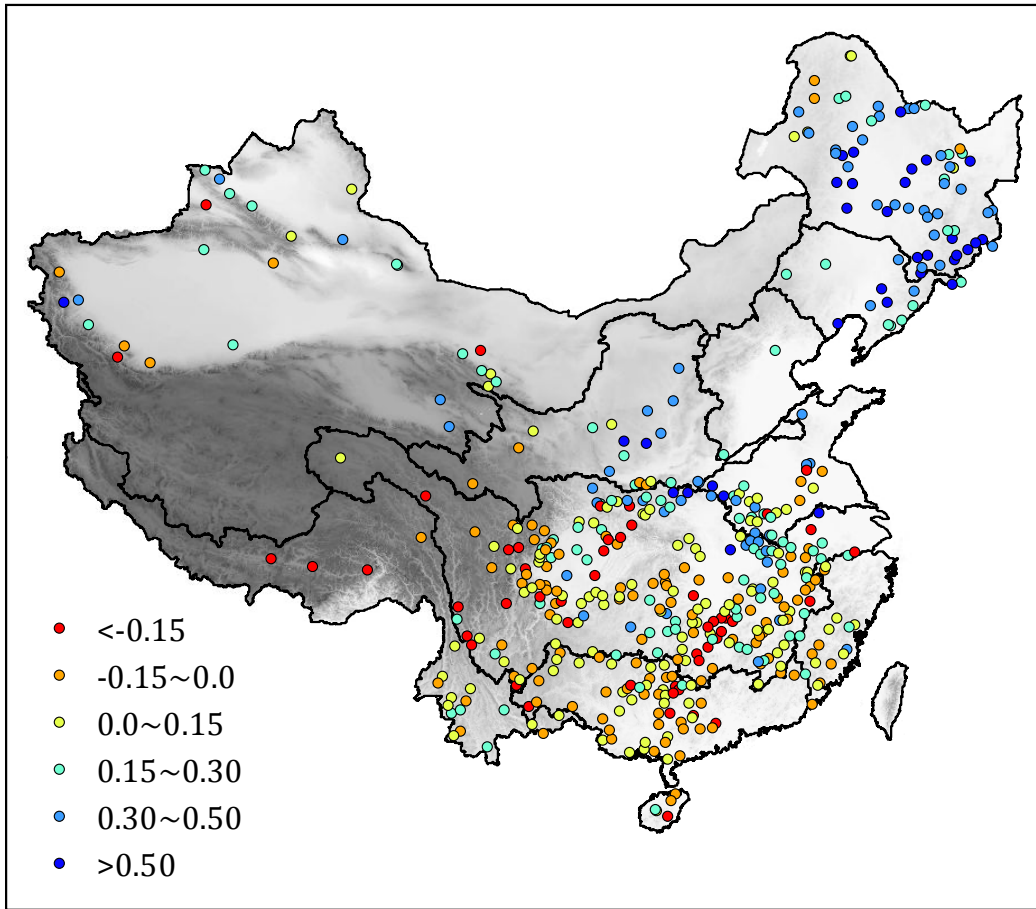

**Figure 7.** Map of the GEV shape parameters for the stationary time series of annual flood peaks.





**Figure 8.** Scatterplots of GEV parameters (a) location, (b) scale, and (c) shape, as a function of drainage areas. Blue (red) scatters represent stations over south (north) China.



**Figure 9.** Percentage of annual flood peaks that are caused by tropical cyclones. The black dots and circles represent the stations with record floods caused by tropical cyclones. The black dots further highlight stations with stationary time series of annual flood peaks.



**Figure 10.** Scatterplot of the shape parameters for the entire series versus the series with annual flood peaks caused by tropical cyclones removed. Blue dots highlight the stations with record floods that are caused by tropical cyclones (see Figure 1 for locations). The insert boxplot shows the differences of shape parameter (series with TC flood peaks removed minus the entire series) for stations with (blue) and without (grey) TC-induced record floods.



**Figure 11.** Tropical cyclones that produced more than 100 annual flood peaks (blue dots) over China. Red dots highlight that the annual flood peak is also the record flood of the station. Dark black line shows tropical cyclone track. Grey shading represents 500 km buffer zone of each track. See Table 1 for more details.
